# Targeting methionine synthase in a fungal pathogen causes a metabolic imbalance that impacts cell energetics, growth and virulence

Jennifer Scott<sup>1</sup>, Monica Sueiro-Olivares<sup>1</sup>, Benjamin P. Thornton<sup>2</sup>, Rebecca A. Owens<sup>3</sup>, Howbeer Muhamadali<sup>4</sup>, Rachael Fortune-Grant<sup>1</sup>, Riba Thomas<sup>1</sup>, Katherine Hollywood<sup>5</sup>, Sean Doyle<sup>3</sup>, Royston Goodacre<sup>4</sup>, Lydia Tabernero<sup>2</sup>, Elaine Bignell<sup>1</sup> and Jorge Amich<sup>1\*</sup>

1. Manchester Fungal Infection Group (MFIG), Division of Infection, Immunity and Respiratory Medicine, School of Biological Sciences, Faculty of Biology, Medicine and Health, University of Manchester, Manchester Academic Health Science Centre, Manchester, UK.

2. School of Biological Sciences, Faculty of Biology, Medicine and Health, University of Manchester, Manchester Academic Health Science Centre, Manchester, UK.

3. Department of Biology, Maynooth University, Co. Kildare, Ireland.

4. Department of Biochemistry, Institute of Integrative Biology, University of Liverpool, Liverpool, UK.

5. Manchester Institute of Biotechnology. University of Manchester, Manchester, UK.

\*Corresponding author: [jorge.amichelias@manchester.ac.uk](mailto:jorge.amichelias@manchester.ac.uk)

## ABSTRACT

There is an urgent need to develop novel antifungals to tackle the threat fungal pathogens pose to human health. In this work, we have performed a comprehensive characterisation and validation of the promising target methionine synthase (MetH). We uncover that in *Aspergillus fumigatus* the absence of this enzymatic activity triggers a metabolic imbalance that causes a reduction in intracellular ATP, which prevents fungal growth even in the presence of methionine. Interestingly, growth can be recovered in the presence of certain metabolites, which evidences that conditional essentiality, defined as genes whose deficiency can be overcome in specific conditions, is present in pathogenic fungi. As this concept must be considered for correct target validation, we have optimised a genetic model to mimic treatment of established infections using the tetOFF system. We show that repression of *metH* in growing hyphae halts growth *in vitro*, which translates into a beneficial effect when targeting established infections using this model *in vivo*. Finally, a structural-based virtual screening of methionine synthases reveals key differences between the human and fungal structures and unravels features in the fungal enzyme that can guide the design of novel specific inhibitors. Therefore, methionine synthase is a valuable target for the development of new antifungals.

## INTRODUCTION

Fungal pathogens represent an increasing risk to human health <sup>1</sup>, with over one billion people worldwide affected by mycoses annually. Many of these mycoses are superficial infections of the skin, nails or mucosal membranes and although troublesome are usually not life-threatening. However, some fungi cause devastating chronic and invasive fungal infections, which result in an estimated 1.6 million deaths per year <sup>2</sup>. Incidences of invasive infections caused by *Aspergillus*, *Candida*, *Cryptococcus* and *Pneumocystis* species are increasing <sup>3</sup>, a cause for serious concern as these genera are responsible for 90% of deaths caused by mycoses <sup>4</sup>. Despite the availability of antifungal drugs, mortality rates for invasive aspergillosis, invasive candidiasis, cryptococcal meningitis and *Pneumocystis jirovecii* pneumonia are intolerably high, reaching over 80%, 40%, 50% and 30% respectively <sup>2,5</sup>. There are currently only four classes of antifungals in clinical use to treat invasive infections (azoles, echinocandins, polyenes and flucytosine), all suffering from pharmacological drawbacks including toxicity, drug-drug interactions and poor bioavailability <sup>6,7</sup>. With the sole exemption of flucytosine, which is only used in combinatory therapy with amphotericin B for cryptococcal meningitis and *Candida* endocarditis <sup>7</sup>, the current antifungals target critical components of the fungal cell membrane or cell wall <sup>8</sup>, which represents a very limited druggable space. The rise of antifungal resistance presents an additional challenge as mortality rates in patients with resistant isolates can reach 100%, making the development of new antifungal drugs increasingly critical for human health <sup>1,9</sup>. Targeting fungal primary metabolism is broadly considered a valid strategy for the development of novel antifungals, as it is crucial for pathogen virulence and survival <sup>10,11</sup>. A primary example of success of this strategy is olorofim (F901318), a novel class of antifungal that targets the pyrimidine biosynthesis pathway <sup>12</sup>, which is currently in clinical trials.

Methionine synthases catalyse the transfer of a methyl group from *N*5-methyl-5,6,7,8-tetrahydrofolate (CH<sub>3</sub>-THF) to L-homocysteine (Hcy). Two unrelated protein families catalyse this reaction: cobalamin dependent methionine synthases (EC 2.1.1.13) and cobalamin independent methionine synthases (EC 2.1.1.14). Members of both families must catalyse the transfer of a low active methyl group from the tertiary amine, CH<sub>3</sub>-THF, to a relatively weak nucleophile, Hcy sulfur. Cobalamin dependent enzymes facilitate this transfer by using cobalamin as an intermediate methyl carrier <sup>13</sup>. By contrast, cobalamin independent enzymes directly transfer the methyl group from CH<sub>3</sub>-THF to Hcy <sup>14</sup>. Logically, proteins of each family differ significantly both at amino acid sequence <sup>15</sup> and 3D structure level <sup>16</sup>.

We have previously shown that the methionine synthase-encoding gene is essential for *A. fumigatus* viability and virulence, which led us to propose it as a promising target for antifungal

drug development<sup>17</sup>. In support of this, a systematic metabolic network analysis by Kaldorf and colleagues identified methionine synthase as a promising antifungal drug target worthy of investigation<sup>18</sup>. Methionine synthase has also been described as essential for *Candida albicans* viability<sup>19,20</sup> and necessary for *Cryptococcus neoformans* pathogenicity<sup>21</sup>, which suggests that a drug developed against this enzyme may have a broad spectrum of action. Moreover, fungal methionine synthases are cobalamin independent, differing significantly from the cobalamin dependent human protein at the amino acid sequence level: only 11.2% identity, 20.4% similarity and 60.2% gaps when aligned the *A. fumigatus* and human proteins using L-Align from EMBL<sup>22,23</sup>. Therefore, it should be possible to develop drugs with low toxicity potential.

Target validation is critical and has been suggested as the most important step in translating a new potential target into a viable drug target because of its role in achieving efficacy in patients<sup>24</sup>. Indeed a retrospective analysis from AstraZeneca's drug pipeline showed that projects that had performed a more thorough target validation were less likely to fail: 73% of the projects were active or successful in Phase II compared with only 43% of projects without such extra target validation<sup>25</sup>. Therefore, in this work we aimed to further substantiate methionine synthase's potential as an antifungal drug target, before advancing the drug discovery process. In particular, we were interested in 1) unravelling the mechanistic basis of methionine synthase essentiality in *A. fumigatus*, which is needed to fully explore the potential of this enzyme as drug target and to be able to anticipate drug resistance mechanisms; and 2) developing *in vivo* models of infection to mimic treatment against the target in an established infection and using them to validate methionine synthase as an antifungal drug target.

## RESULTS AND DISCUSSION

### *Methionine synthase enzymatic activity is essential for Aspergillus fumigatus viability*

We had previously demonstrated that the methionine synthase encoding gene is essential for *A. fumigatus* viability and virulence<sup>17</sup>; however, the underlying reason for this essentiality was still unclear. To address this question, here we have constructed strains that express the *metH* gene under the control of a tetOFF system recently adapted for *Aspergillus*<sup>26</sup> in two different *A. fumigatus* wild-type backgrounds, ATCC46645 and A1160. The advantage of the tetOFF system over other regulatable systems is that doxycycline (Dox) can be added to downregulate gene expression in growing hyphae (Fig. S1A), and thus this system permits investigation of the consequences of the repression of an essential gene in growing mycelia. The constructed *metH\_tetOFF* strains (*H\_OFF*) grew as the wild type in the absence of Dox, but as little as 0.5

µg/mL was sufficient to completely prevent colony development on an agar plate even in the presence of methionine (Fig. S1B). This corroborates our previous result that methionine synthase is essential for *A. fumigatus* viability and that its absence does not result in a sheer auxotrophy for methionine.<sup>17</sup>.

Methionine synthase forms an interjection between the trans-sulfuration pathway and the one carbon metabolic route (Fig. 1A), as the enzyme utilizes 5-methyl-tetrahydrofolate as co-substrate. Therefore, the essentiality of *metH* might be due to required integrities of the trans-sulfuration pathway or of the one carbon metabolic route. Alternatively, it could be that the presence of the enzyme itself is essential, either because its enzymatic activity is required or because it is fulfilling an unrelated additional role, as being part of a multiprotein complex. To start discerning among these possibilities, we constructed a double  $\Delta metG\Delta cysD$  mutant, blocked in the previous step of the trans-sulfuration pathway, and a  $\Delta metF$  deletant, which blocks the previous step of the one-carbon metabolic route (Fig. 1A). As we had previously observed<sup>27</sup>, to rescue fully  $\Delta metF$ 's growth the media had to be supplemented with methionine and other amino acids, as the folate cycle is necessary for the interconversion of serine and glycine and plays a role in histidine and aromatic amino acid metabolism<sup>28,29</sup>. Consequently, we added a mix of all amino acids except cysteine and methionine to the S-free medium for this experiment. Phenotypic tests (Fig. 1B) confirmed that the  $\Delta metG\Delta cysD$  and  $\Delta metF$  mutants were viable and could grow in the presence of methionine. In contrast, the *H<sub>OFF</sub>* conditional strain could not grow under restrictive conditions even in the presence of the amino acid mix and methionine (Fig. 1B). Therefore, the MetH protein itself, and not the integrity of the trans-sulfuration and one-carbon pathways, is essential for *A. fumigatus* viability. Interestingly, the methionine auxotroph  $\Delta metG\Delta cysD$  was avirulent in a leukopenic model of pulmonary aspergillosis (Fig. S1C), suggesting that the amount of readily available methionine in the lung is very limited, not sufficient to rescue its auxotrophy. Indeed, the level of methionine in human serum was calculated to be as low as ~20 µM<sup>30,31</sup>, which was described as insufficient to support the growth of various auxotrophic bacterial pathogens<sup>32</sup> and we have also observed that is not enough to rescue growth of the *A. fumigatus*  $\Delta metG\Delta cysD$  auxotroph.

Essentiality of the MetH protein could be directly linked to its enzymatic activity or, alternatively, the protein could be performing an additional independent function. To discern between these two possibilities, we constructed two strains that express single-point mutated versions of MetH from the innocuous *Ku70* locus of the *H<sub>OFF</sub>* background strain, under the control of its native promoter (Fig. 1C). These point mutations, *methH*<sup>g2042A>2C</sup> (D616A) and *methH*<sup>g2179TA>9GC</sup> (Y662A), were previously described to prevent conformational rearrangements

required for activity of the *C. albicans* methionine synthase<sup>33</sup>. In the absence of Dox, these strains grew normally, as they expressed both the wild-type MetH, from the tetOFF promoter, and the mutated version of the protein (Fig. 1C). In the presence of Dox, when the wild-type *metH* gene was downregulated, the Y662A strain grew on sulfate worse than in non-restrictive conditions, but still to a significant extent, suggesting that this point mutation did not completely abrogate enzymatic activity (Fig. 1C). Interestingly, Y662 grew normally on methionine, showing that methionine can compensate for a partial reduction of MetH activity (Fig 1C). The D616A strain (two isolates were tested) was not able to grow on sulfate (Fig. 1C), demonstrating that enzymatic activity was fully blocked. Nor could it grow on methionine (Fig. 1C), indicating that enzymatic activity is required for viability even in the presence of the full protein. All these phenotypes support the conclusion that methionine synthase enzymatic activity is required for viability.

# *Absence of methionine synthase enzymatic activity results in a shortage of crucial metabolites, but does not cause toxic accumulation of homocysteine*

The absence of methionine synthase enzymatic activity has two direct consequences, which could cause deleterious effects and therefore explain its essentiality (Fig. 1A). It could cause an accumulation of the potentially toxic substrate homocysteine and a shortage of the co-product tetrahydrofolate (THF). THF is directly converted to 5,10-methylene-THF, which is required for the synthesis of purines and thymidylate (TMP), and thus for DNA synthesis; additionally, as purine biosynthesis requires Gln, Gly and Asp, and THF *de novo* synthesis requires chorismate (precursor of aromatic amino acids), a shortage of THF might cause a depletion of amino acids (Fig. 1A). To investigate if the depletion of any of these metabolites underlies MetH essentiality, we supplemented the media with a number of precursors and potentially depleted metabolites (Fig. 2A). Added as sole supplement, only adenine was able to trigger growth, but to a minimal degree. Further addition of a mixture of all amino acids noticeably improved growth. Supplementation with adenine and guanine (purine bases) did also reconstitute noticeable growth, which was not enhanced with further addition of amino acids. Folic acid was also capable of reconstituting growth, but only when amino acids were added as the sole N-source (Fig. S3). However, no combination of compounds was able to reconstitute growth to the wild-type level. This suggests that a shortage of relevant metabolites derived from THF, prominently adenine, partially accounts for methionine synthase essentiality, but cannot explain it completely. Hence, although supplementation with adenine and other amino acids can partially restore growth, a *metH* mutant in *A. fumigatus* is not merely a methionine and adenine

combined auxotroph, as it is the case in other fungi as *Pichia pastoris*<sup>34</sup> or *Schizosaccharomyces pombe*<sup>35</sup>.

To investigate if homocysteine could be accumulating to toxic levels in the absence of MetH activity, we over-expressed several genes that should alleviate its accumulation. To this aim we designed and constructed the plasmid pJA49, which allows direct integration of any ORF to episomally overexpress genes in *A. fumigatus*. Plasmid pJA49 carries the *A. nidulans* AMA1 autologous replicating sequence<sup>36,37</sup> and the hygromycin B resistance gene (*hygrB*) as a selection marker. A unique *StuI* restriction site allows introduction of any PCR amplified ORF in frame under the control of the *A. fumigatus* strong promoter *hspA*<sup>38</sup> and the *A. nidulans* *trpC* terminator (Fig S2A). Using this plasmid, we produced a strain in the *H\_OFF* background that episomally overexpresses *mecA*, encoding cystathionine- $\beta$ -synthase, which converts homocysteine to cystathionine (Fig. 1A). Homocysteine exerts toxic effects through its conversion to S-adenosylhomocysteine, which causes DNA hypomethylation<sup>39,40</sup>, or to homocysteine thiolactone, which causes N-homocysteinylation at the  $\epsilon$ -amino group of protein lysine residues<sup>41,42</sup>. Consequently, we also constructed strains that episomally over-express genes that could detoxify those products: the S-adenosyl-homocysteinase lyase encoding gene *sahL* (AFUA\_1G10130) or the *A. nidulans* homocysteine thiolactone hydrolase encoding gene *blhA* (AN6399) (*A. fumigatus* genome does not encode any orthologue) (Fig. S2B). However, despite a strong over-expression of the genes (Fig. S2C&D), none of them could rescue growth of the *H\_OFF* strain in restrictive conditions (Fig. 2B), suggesting that a toxic accumulation of homocysteine does not explain the essentiality of MetH enzymatic activity. Addition of adenine to the medium did not improve growth of the overexpression strains further than that of the *H\_OFF* background (Fig. 2B), indicating that there is not a combined effect of homocysteine accumulation and depletion of THF-derived metabolites. Toxic accumulation of homocysteine was speculated to be the underlying reason of methionine synthase essentiality in both *Candida albicans* and *Cryptococcus neoformans*<sup>20,21</sup> but we have demonstrated that this is not the case in *A. fumigatus*. Therefore, although we do not have any evidence to refute the previous assumption in other fungal pathogens, we suggest that it should be revisited.

*Methionine synthase repression triggers a metabolic imbalance that causes a decrease in cell energetics*

Aiming to identify any adverse metabolic shift in the absence of MetH and/or accumulation of toxic compounds that could explain its necessity for proper growth, we performed a



metabolomics analysis, via gas chromatography-mass spectrometry (GC-MS), comparing the metabolites present in wild-type and *H<sub>OFF</sub>* strains before and after Dox addition. Before Dox addition both strains clustered closely together in a Principal Component Analysis (PCA) scores plot (Fig. S4A), showing that their metabolic profiles are highly similar. However, 6 h after Dox addition the strains clusters became clearly separated, denoting differential metabolite content. Analysis of the differentially accumulated metabolites (full list can be consulted in Table S1) using the online platforms MBRole<sup>43</sup> and Metaboanalyst<sup>44,45</sup> did not reveal any obvious metabolic switch, probably due to the rather small number of metabolites that could be identified by cross-referencing with the Golm library (<http://gmd.mpimp-golm.mpg.de/>). Manual inspection of the metabolites pointed out interesting aspects. Firstly, the methionine levels were not significantly different, which demonstrates that methionine supplementation in the growth medium triggers correct intracellular levels in the *H<sub>OFF</sub>* strain; this undoubtedly rules out that a shortage of methionine could be the cause of the essentiality of methionine synthase. Secondly, we detected a significantly lower amount of adenosine in the *H<sub>OFF</sub>* strain compared with the wild-type after Dox addition (Fig. 3A), which is in agreement with our previous result that supplementation of adenine can partially reconstitute growth in the absence of MetH. We did not find accumulation of compounds with a clear toxic potential upon *metH* repression. Nevertheless, we detected a lower amount of several amino acids (Phe, Ser, Glu, Pro, Ile, Thr, Ala and Asp, Fig. S4B), which suggests that the cells may enter into growth arrest upon *metH* repression. Interestingly, we noticed a significantly lower accumulation of some metabolites of the glycolysis pathway and TCA cycle (Fig. 3A) and some other mono and poly-saccharides (Fig. S4B). These variations could reflect a low energetic status of the cells upon *metH* repression. Indeed, we found that the level of ATP significantly decreased in the *H<sub>OFF</sub>* strain upon Dox addition (Fig. 3B). Therefore, we evaluated if supplementation of the medium with substrates that have the potential to increase cell energetics can rescue *H<sub>OFF</sub>* growth in restrictive conditions. Indeed, we found that when pyruvate, which can directly be converted to acetyl-CoA to enter the TCA cycle, was added as the sole carbon source *H<sub>OFF</sub>* growth was reconstituted in restrictive conditions to the same level as the wild-type (Fig. 3C). Growth was limited for both strains, as pyruvate does not appear to be a good carbon source<sup>46</sup>. However, the presence of glucose in the medium precluded the reconstitution of growth of *H<sub>OFF</sub>* (Fig. S3), as it has been described to prevent pyruvate uptake in *S. cerevisiae*<sup>47</sup>. We next tested the capacity of ATP to be used as an alternative energy source and to reconstitute growth. To diversify the presence of permeases in the cell membrane, and thus maximise the chance of ATP uptake, we assayed two different N-sources: ammonium (NH<sub>4</sub><sup>+</sup>, preferred source) and amino acids (Fig. S3). Indeed, when amino acids were the only N-source, supplementation of the medium with



ATP reconstituted *H<sub>OFF</sub>* growth in restrictive conditions to wild type levels (Fig. 3C). This agrees with the recent observation that eukaryotic cells can uptake ATP and exploit it as an energy source<sup>48</sup>. In conclusion, a decrease in cell energetics developed in the absence of methionine synthase is the underlying reason of its essentiality for growth.

The fact that growth in the absence of methionine synthase can be reconstituted when there are sufficient levels of ATP implies that *metH* is not an absolutely essential gene. It falls within the definition of conditional essentiality, which encompasses genes that are essential in the absence of the specific conditions that can overcome disturbances derived from its deficiency. We expect that a significant number of genes previously described as essential in fungi would in fact fall within this new definition of conditionally essential, however the right conditions to reconstitute growth have not been identified in many cases. Based on this, there is a paramount implication for drug target identification: to be a valid target the deficiencies introduced by a conditionally essential gene must not be overcome during infection. In the case of methionine synthase, it is unlikely that the fungus could acquire sufficient levels of ATP (combined with methionine and not using preferred N-source) in the lung tissue to overcome the growth defect resulting from targeting MetH. The concentration of free extracellular ATP in human plasma has been calculated to be in the sub-micromolar range (28-64 nM)<sup>49</sup>. In the lungs, extracellular ATP concentrations must be strictly balanced and increased levels are implicated in the pathophysiology of inflammatory diseases<sup>50</sup>; nevertheless, even in such cases ATP levels have been calculated in the low micromolar range<sup>51,52</sup>.

We then questioned how the lack of methionine synthase's enzymatic activity could cause a drop in cell energy. We hypothesised that blockage of methionine synthase activity likely causes a forced conversion of 5,10-methylene-THF to 5-methyl-THF by the action of MetF (Fig. 1A). In support of this, we observed that expression of *metF* was increased in the *H<sub>OFF</sub>* strain (Fig. 3D). This likely causes a shortage of 5,10-methylene-THF, as the conversion is not reversible and THF cannot be recycled by the action of methionine synthase (Fig. 1A). Indeed, supplementation of folic acid (only when amino acids are the sole N-source, Fig. S3) and of purines could partially restore growth (Fig. 2A), as they compensate for the deficit in purine ring biosynthesis when there is a shortage of 5,10-methylene-THF. However, this still does not explain why there is a drop in ATP. We hypothesised that the block of purine biosynthesis might be sensed as a shortage of nucleotides. This could then cause a shift in glucose metabolism from glycolysis and the TCA cycle (which produce energy) to the Pentose Phosphate Pathway (PPP), which is required to produce ribose-5-phosphate, an integral part of nucleotides. In a similar vein, it has recently been described that activation of anabolism in *Saccharomyces cerevisiae* implies

increased nucleotide biosynthesis and consequently metabolic flow through the PPP<sup>53</sup>. To evaluate our hypothesis, we investigated the transcription level of the glucose-6-phosphate dehydrogenase (G6PD) encoding gene (AFUA\_3G08470), which catalyses the first committed step of the PPP. In agreement with our hypothesis, the expression of G6PD encoding gene increases in the *H\_OFF* strain upon addition of Dox (Fig. 3D), likely reflecting an increased flow through the PPP. We then wondered how cells may be activating the PPP. The target of rapamycin (TOR) TORC1 effector, which is widely known to activate anabolism and growth<sup>54-56</sup>, has been described to activate the PPP in mammalian cells<sup>57,58</sup> and has been functionally connected with energy production and nucleotide metabolism in *A. fumigatus*<sup>59</sup>. In addition, the cAMP/PKA (protein kinase A) pathway is known to be paramount for sensing of nutrients and the correspondent adaptation of gene expression and metabolism<sup>60</sup>, and was found to be implicated in the regulation of nucleotide biosynthesis in *A. fumigatus*<sup>61</sup>. Consequently, we explored if a partial block of TOR with low concentrations of rapamycin or of PKA with H-89 could prevent the imbalanced activation of the PPP in the absence of MetH activity. However, neither of the inhibitors could reconstitute growth of the *H\_OFF* strain in restrictive conditions (Fig. S4C). This means that neither the TOR nor the PKA pathways seem to be involved in the deleterious metabolic shift that activates PPP and therefore the mechanism remains to be elucidated.

In summary, we propose that absence of methionine synthase activity causes a strong defect in purine biosynthesis that the cell tries to compensate for by shifting carbon metabolism to the PPP; this metabolic imbalance causes a drop of ATP levels, which collapses cell energetics and results in halted growth (Fig. 3E).

Interestingly, we also detected that *metF* expression is higher in the *H\_OFF* strain compared to the wild-type, even in the absence of Dox (Fig. 3D). This could be explained as an effort to compensate a higher demand of 5-methyl-THF by the slightly increased amount of methionine synthase in this strain (Fig. S1A). This effect could cause a mild defect in purine biosynthesis in the *H\_OFF* strain, and indeed adenosine content was lower in the *H\_OFF*-Dox condition compared with the wild-type-Dox sample in the metabolome analysis (Fig 3A). Furthermore, this also explains why we detected a small but significant increase of G6PD expression in the *H\_OFF*-Dox condition (Fig. 3D). Therefore, it seems that upregulating methionine synthase has the potential to cause the same metabolic imbalance as downregulating it. However, the effect of overexpression (notice that it is only ~1.5 fold in our strain Fig. S1A) is minor and does not have obvious consequences for growth, as THF can be recycled and thus the shortage of 5,10-methylene-THF is not severe. In any case, two important points can be highlighted from this

small imbalance. Firstly, methionine synthase activity is very important and must be finely tuned to maintain a proper metabolic homeostasis. Secondly, changing the expression level of genes with constitutive and/or regulatable promoters can have unexpected and hidden consequences that often go unnoticed.

### *Supplementation with S-adenosylmethionine reconstitutes ATP levels and growth*

We have shown that the absence of MetH activity causes a reduction in ATP levels. S-adenosylmethionine (SAM) is produced from methionine and ATP by the action of S-adenosylmethionine synthetase SasA (Fig. 1A), an essential enzyme in *A. nidulans*<sup>62</sup>. Hence, we reasoned that the absence of MetH activity might cause a decrease in SAM levels. To test that hypothesis, we first attempted to rescue growth of the *H<sub>OFF</sub>* strain in a medium supplemented with methionine and SAM. We tested various N-sources to diversify the presence of permeases in the cell membrane, aiming to maximise the chances of SAM uptake (Fig. S3). Indeed, the addition of SAM reconstituted growth of the *H<sub>OFF</sub>* strain in restrictive conditions in the presence of methionine when amino acids were the only N-source (Fig. 4A and S3). We then measured the intracellular concentration of SAM in growing mycelia upon addition of Dox using MS/MS. Surprisingly, we observed that addition of Dox to the *H<sub>OFF</sub>* strain did not cause a significant reduction in SAM levels (Fig. 4B). Consequently, we wondered how the addition of SAM may reconstitute *H<sub>OFF</sub>* growth if its levels are not reduced upon *metH* repression. We speculated that as SAM is a crucial molecule it continues to be produced even if the levels of ATP are reduced, draining it from other cellular processes and thus triggering energy deprivation. In support of this hypothesis, we observed that supplementing SAM to the medium increased the levels of ATP in growing hyphae (Fig. 4C).

In any case, as SAM supplementation can reconstitute *H<sub>OFF</sub>* growth, it constitutes another condition that overcomes the conditional essentiality of *metH*. However, the concentration of SAM in human serum is extremely low, in the range of 100-150 nM<sup>31</sup>, and consequently it is unlikely that the fungus could find sufficient SAM during infection to compensate for the defect in ATP caused by targeting methionine synthase.

S-adenosylmethionine plays a fundamental role as methyl donor for the majority of cellular methylation reactions, including methylation of DNA. Given the observed importance of SAM in the absence of MetH activity and considering that in *P. pastoris* and *C. albicans* methionine synthase was reported to localise in the nucleus, as well as in the cytoplasm<sup>34</sup>, we speculated that nuclear localization might be important for MetH cellular function. To test this hypothesis,

we constructed strains expressing different versions of C-terminus GFP-tagged MetH from the pJA49 plasmid (Fig. S2) in the *H\_OFF* background. These were a wild-type MetH, a MetH<sup>D616A</sup> (control of no growth –Fig. 1C & S5A–) and a MetH<sup>R749A</sup> (*methH*<sup>g2439CG>GA</sup>) version of the protein, which according to the results published for *P. pastoris* should not localise in the nucleus<sup>34</sup>. The strain expressing wild-type MetH grew normally in restrictive conditions (Fig. S5A), proving that the tagged MetH-GFP protein was active. We confirmed that *A. fumigatus* MetH localises in both the nucleus and cytoplasm (Fig 4D & S5B). In contrast to what was described in *P. pastoris*, the MetH<sup>R749A</sup> protein seems to be active, as it could trigger growth of *H\_OFF* in restrictive conditions (Fig. S5A) and still localised into the nucleus (Fig. S5B). Therefore, the possibility that MetH localisation in the nucleus is important needs further exploration.

### *Repression of methionine synthase causes growth inhibition in growing mycelia*

The major advantage of the tetOFF system is that it can be employed to simulate a drug treatment before a specific chemical is developed. Addition of Dox to a growing mycelium downregulates the gene of interest (Fig S1A), mimicking the effect of blocking its product by the action of a drug. To investigate the effect that blocking MetH has for mycelial growth, we added Dox to 12, 16 or 24 h grown submerged mycelia and left it incubating for an additional 24 h. Addition of Dox to 12 or 16 h grown mycelia severely impaired growth, as observed by biomass (Fig. 5A) and OD (Fig S6A) measurements. This effect was lost when Dox was added to 24 h grown mycelia, due to the incapacity of Dox to reach and downregulate expression in all cells within the dense mass of an overgrown mycelium. Interestingly, Dox addition to methionine free media stopped *H\_OFF* growth immediately, which can be observed by comparing fungal biomass at the time of Dox addition to the measurement 24 h after Dox addition. In contrast, the fungus inoculated in methionine containing media grew a little further after Dox addition (Fig. 5A). To understand this difference, we added Dox to either resting or 8 h germinated conidia and imaged them 16 and 40 hs after drug addition (Fig. 5B & Fig. S6B). In agreement with the previous result, we observed that Dox addition in methionine free medium inhibited growth immediately: resting conidia did not germinate and germinated conidia did not elongate the germ tube. In contrast, after addition of Dox in methionine containing medium, most of the resting conidia were still able to germinate and some germlings could elongate the germinated tubes to form short hyphae. This suggests that the drop in ATP levels takes ~3-4 h before having an effect on growth. Importantly, once growth was inhibited, the effect was sustained for a long period, as we could not detect further growth up to 40 h post-inoculation. To corroborate these observations and further determine whether the effect of growth is fungistatic or fungicidal in

the long term, we performed a time-lapse analysis of the effects of adding Dox to 8 h swollen conidia and its subsequent withdrawal after 16 h of incubation (Fig. 5C and Video 1). We observed that growth was inhibited ~4 h after Dox addition and almost completely halted after 6 h, which was sustained as long as the drug was present. Upon withdrawal of Dox, growth resumes within 6 h (Fig 5D), showing that the effect of blocking MetH is fungistatic, at least with the genetic TeOFF model of *metH* repression.

#### *Targeting MetH in established infections interferes with the progression of disease*

Using the TetON system we previously showed that impeding genetic expression of *metH* in the infecting conidia resulted in avirulence in a murine model of invasive pulmonary aspergillosis<sup>17</sup>. This demonstrated that the murine lung does not readily provide the conditions to overcome the conditional essentiality of *metH*, and thus this gene is required to establish infection. However, antifungal drugs are normally administered to treat patients who already have an established infection. This could imply that the conditional essentiality of the gene is overcome as the fungal metabolic requirements and the environmental conditions are different when the fungus is actively growing in the tissue. Consequently, in order to achieve a rigorous target validation, it is crucial to assess the efficiency of new target candidates in established infections. Currently, two systems can be used to assess the relevance of fungal essential genes for pulmonary infection: TetON and (p)xyIP. These systems can be used to either impede or permit fungal gene expression in murine lungs; but in both models this control must be exerted from the beginning of infection, as sufficient levels of the inducing molecule (doxycycline or xylose) must be present to activate gene expression in the control condition. Consequently, these models have been used to investigate the role of genes that are required to grow *in vitro* to establish infection<sup>17,63,64</sup>. However, those models cannot be used to mimic drug treatments of already established aspergillosis infections *in vivo*. Therefore, we aimed to optimise the use of the TetOFF system for this purpose, as it can be used to downregulate gene expression in growing mycelia. As a control for the model, we constructed a *cyp51A\_tetOFFΔcyp51B* (51A\_OFF) strain. We reasoned that the target of the azoles, first-line treatment drugs for *Aspergillus* diseases, should be the gold standard to compare to for any target. This strain showed a similar behaviour as *H\_OFF* *in vitro*: as little as 0.05 µg/ml Dox prevented colony development on an agar plate (Fig. S7A) and addition of Dox to conidia or germlings blocked growth (Fig. S7B).

We first assayed the use of the TetOFF system in the *Galleria mellonella* alternative mini-host model of infection. Preliminary experiments revealed that the balance between reaching sufficient levels of Dox to exert an effect and preventing toxic effects of overdose was very delicate. We finally optimised a regimen consisting of 5 injections of 50 mg/kg Dox (Fig. S8A). We then infected *Galleria* larvae with  $5 \times 10^2$  conidia of *51A\_OFF* or *H\_OFF* strains and applied the Dox regimen or PBS vehicle starting at the same time of infection (0 h) or 6 h after infection (Fig. S8A). For both strains, administration of Dox from the beginning of infection triggered a significant improvement in survival compared with the non-treated conditions (50% VS 17.2% for *51A\_OFF*,  $P=0.0036$ , and 41.45% VS 6.67% for *H\_OFF*,  $P=0.022$ ) (Fig. 6A). Notably, the administration of Dox at the time of infection, with either strain, did not improve survival to close to 100%. Considering that both strains are unable to grow in the presence of the drug (Fig. S6B, S7B), this was a surprising result that suggests the levels of Dox reached *in vivo* are not sufficient to completely downregulate gene expression. This could be due to a rapid metabolism of the drug in the larvae hemocoel or to microenvironment variations in its concentration. Despite this caveat of the model, we observed that administration of Dox 6 h after infection also triggered a significant improvement in survival for both strains (42.8% VS 17.2% for *51A\_OFF*,  $P=0.0007$ , and 32.26% VS 6.67% for *H\_OFF*,  $P=0.0324$ ) (Fig. 6A). Therefore, downregulation of methionine synthase genetic expression in established infections conferred a significant benefit in survival which was comparable to that observed with the target of the azoles.

The positive results obtained using the *Galleria* infection model prompted us to assay the TetOFF system in a leukopenic murine model of pulmonary aspergillosis. To ensure that Dox levels in mouse lungs reach and maintain sufficient concentrations to downregulate gene expression (according to our results *in vitro*) we performed a pilot Dox dosage experiment in immunosuppressed non-infected mice (Fig S8B). We extracted lungs of Dox treated mice at different time-points, homogenated them and measured Dox concentration using a bioassay based on inhibition of *Escherichia coli* DH5 $\alpha$  growth. We could detect promising levels of Dox in all mice (concentrations ranging from 2.2 to 0.94  $\mu\text{g/mL}$  –Fig. S8B–) which according to our results *in vitro* should be sufficient to downregulate gene expression from the TetOFF system. We therefore infected leukopenic mice with  $10^5$  spores of the *51A\_OFF* or the *H\_OFF* strains and administered PBS vehicle or our Dox regimen, starting 16 h after infection (Fig. S8B). The use of an uninfected, Dox treated control group uncovered that the intense Dox regimen used was harmful for the mice. These uninfected mice lost weight at a similar rate as the infected groups and looked ill from the third or fourth day of treatment. This might be due to a toxic effect



caused by the previously described iron chelating properties of Dox<sup>65</sup>, although we have made no attempt to confirm this. As a consequence, there was no beneficial effect of Dox treatment on survival (not shown). The fact that Dox treatment did also not show any benefit in survival for our control strain *51A\_OFF*, which should mimic treatment with azoles (primary therapy for invasive aspergillosis), indicates that the TetOFF system is not adequate to mimic a drug treatment in established infections. Nevertheless, we further attempted to determine the efficiency of targeting MetH in established infections by measuring fungal burdens in lungs of treated and untreated mice. We observed that two and a half days of Dox treatment (which had not caused visible toxic effects) did result in a significant reduction of fungal burdens 3 days after infection for both *51A\_OFF* ( $P=0.0279$ ) and *H\_OFF* ( $P=0.0019$ ) (Fig. 6B). Therefore, we could observe a beneficial effect of interfering with methionine synthase genetic expression in an established pulmonary infection, which was comparable to that of interfering with the expression of *cyp51A*, the target of azoles. To our knowledge, this is the most rigorous validation made for a fungal target *in vivo* to date.

A recent study also aimed to use another TetOFF system to validate a drug target in established aspergillosis infections<sup>66</sup>. These authors administered Dox exclusively through oral gavage, accounting for lower dosage of drug. Consequently, even if no toxic effect was observed, they did also not detect any beneficial effect on survival when the Dox treatment was initiated after infection. Therefore, even if the TetOFF system is currently the only model that allows investigating the efficiency of new targets in aspergillosis established infections, it is clearly not optimal and better models are needed.

#### *Structural-based virtual screening of MetH*

Having shown *in vivo* that MetH is a promising target, we decided to investigate its druggability by running a structural-based virtual screening. The sequence of *A. fumigatus* MetH (AfMetH) contains two predicted methionine synthase domains with a  $\beta$ -barrel fold conserved in other fungal and bacterial enzymes. The structure of the *C. albicans* orthologue<sup>67</sup> (CaMetH) showed that the active site is located between the two domains where the methyl tetrahydrofolate, the homocysteine substrate and the catalytic zinc ion bind in close proximity. The homology model for AfMetH (Fig. 7A) overlaps very well with that of the CaMetH thus providing a suitable molecular model for further analysis. In contrast, the structure of the human methionine synthase (hMS) shows a very different overall arrangement with the folate and homocysteine binding domains located in completely different regions (Fig. 7B). Comparison of the



tetrahydrofolate binding sites between the fungal and the human structures also highlights significant structural differences that affect the conformation adopted by the ligand. In the CaMetH structure the 5-methyl-tetrahydrofolate (C2F) adopts a bent conformation (<20Å long) and it is in close proximity to the methionine product, whereas in the human structure the tetrahydrofolate (THF) ligand binds in an elongated conformation extending up to 30Å from end to end, (Fig. 7 C&D).

Virtual screening (VS) was carried on the AfMetH and the hMS structures with the Maybridge Ro3 fragment library to explore potential venues for drug development. The results showed four ligand binding clusters in the AfMetH structure, two of which (C1, C2) match the binding position of the 5-methyl-tetrahydrofolate and the methionine from the CaMetH crystal structure (Fig. 7E). For the hMS, we found two main clusters, C1 that overlaps with the tetrahydrofolate binding site and C2 in a nearby pocket. Clearly the distribution of the clusters defines a very different landscape around the folate site between the human and the fungal enzymes. Furthermore, the proximity of the C1 and C2 clusters, matching the folate and Met/homocysteine binding sites in the Ca/Af proteins means that it may be possible to combine ligands at both sites to generate double-site inhibitors with high specificity towards the fungal enzymes. Antifolates are a class of drugs that antagonise folate, blocking the action of folate dependent enzymes such as dihydrofolate reductase (DHFR), thymidylate synthase or methionine synthase. Methotrexate is an antifolate commonly used to treat cancer and autoimmune diseases. Interestingly, methotrexate has been shown to be a weak inhibitor of the *C. albicans* methionine synthase<sup>33</sup> and to have some antifungal activity against *C. albicans*<sup>68</sup> and *Aspergillus ssp*<sup>69</sup>. Nevertheless, methotrexate is not a good antifungal drug, as its activity is high against human enzymes (IC<sub>50</sub> of 0.3 µM for DHFR<sup>70</sup>) and low against fungal methionine synthase (IC<sub>50</sub> of 4 mM for *C. albicans* MetH<sup>33</sup>). Therefore, more potent and specific inhibitors of fungal methionine synthases are needed to fully exploit the value of this target for antifungal therapy, a task that seems possible and can be directed from our analyses.

In summary, we have shown that methionine synthase blockage triggers not only methionine auxotrophy, but also a metabolic imbalance that results in a drop in cellular energetics and growth arrest. In light of our results, we propose that conditional essentiality is important to understand the underlying mechanisms of metabolic processes and needs to be considered to achieve proper validation of novel antimicrobial targets. Accordingly, we proved that targeting methionine synthase in established infections has a beneficial effect similar to that observed for the target of azoles, the most effective drugs for the treatment of aspergillosis. Finally, we

showed that fungal methionine synthases have distinct druggable pockets that can be exploited to design specific inhibitors. In conclusion, we have demonstrated that fungal methionine synthases are promising targets for the development of novel antifungals

## MATERIAL AND METHODS

### *Strains, media and culture conditions*

The *Escherichia coli* strain DH5 $\alpha$ <sup>71</sup> was used for cloning procedures. Plasmid-carrying *E. coli* strains were routinely grown at 37°C in LB liquid medium (Oxoid) under selective conditions (100  $\mu\text{g}\cdot\text{mL}^{-1}$  ampicillin or 50  $\mu\text{g}\cdot\text{mL}^{-1}$  kanamycin); for growth on plates, 1.5% agar was added to solidify the medium. All plasmids used in the course of this study were generated using the Seamless Cloning (Invitrogen) technology as previously described<sup>17,72</sup>. *E. coli* strain BL21 (DE3)<sup>73</sup> was grown on Mueller Hinton agar (Sigma) in bioassays, to determine Dox concentrations within homogenized murine lungs, as previously described by Law and colleagues<sup>74</sup>.

The wild-type clinical isolate *Aspergillus fumigatus* strain ATCC 46645 served as reference recipient. *A. fumigatus* strain A1160 (*ku80 $\Delta$* )<sup>75</sup> was also used to confirm *metH* essentiality. *A. fumigatus* mutants were generated using a standard protoplasting protocol<sup>76</sup>. *A. fumigatus* strains were generally cultured in minimal medium (MM)<sup>77</sup> (1% glucose, 5 mM ammonium tartrate, 7 mM KCl, 11 mM KH<sub>2</sub>PO<sub>4</sub>, 0.25 mM MgSO<sub>4</sub>, 1 $\times$  Hutner's trace elements solution; pH 5.5; 1.5% agar) at 37°C. For selection in the presence of resistance markers 50  $\mu\text{g}\cdot\text{mL}^{-1}$  of hygromycin B or 100  $\mu\text{g}\cdot\text{mL}^{-1}$  of pyrithiamine (InvivoGen) were applied. In sulfur-free medium (MM-S), MgCl<sub>2</sub> substituted for MgSO<sub>4</sub> and a modified mixture of trace elements lacking any sulfate salt was used. For all growth assays on solid media, the culture medium was inoculated with 10  $\mu\text{l}$  of a freshly prepared *A. fumigatus* spore suspension (10<sup>5</sup> conidia $\cdot\text{mL}^{-1}$  in water supplemented with 0.9% NaCl and 0.02% Tween 80) and incubated at 37°C for 3 days.

### *Extraction and manipulation of nucleic acids*

Standard protocols of recombinant DNA technology were carried out<sup>78</sup>. Phusion<sup>®</sup> high-fidelity DNA polymerase (ThermoFisher Scientific) was generally used in polymerase chain reactions and essential cloning steps were verified by sequencing. Fungal genomic DNA was prepared following the protocol of Kolar *et al.*<sup>79</sup> and Southern analyses were carried out as described<sup>80,81</sup>, using the Amersham ECL Direct Labeling and Detection System<sup>®</sup> (GE Healthcare). Fungal RNA was isolated using TRIzol reagent (ThermoFisher Scientific) and Qiagen plant RNA extraction kit. Retrotranscription was performed using SuperScript III First-Strand Synthesis (ThermoFisher

Scientific). RT-PCR on both gDNA and cDNA was performed using the SYBR® Green JumpStart (Sigma) in a 7500 Fast Real Time PCR cyclor from Applied Biosystems.

# *Microscopy*

10<sup>3</sup> *A. fumigatus* resting or 8 h germinated conidia were inoculated in 200 µL of medium (+/- Dox) in 8 well imaging chambers (ibidi) and incubated at 37°C. Microscopy images were taken on a Nikon Eclipse TE2000-E, using a CFI Plan Apochromat Lambda 20X/0.75 objective and captured with a Hamamatsu Orca-ER CCD camera (Hamamatsu Photonics) and manipulated using NIS-Elements 4.0 (Nikon). For extensively grown mycelia a stereomicroscope Leica MZFL-III was used, with a Q-imaging Retinga 6000 camera, and manipulated using Metamorph v7760. Confocal imaging was performed using a Leica TCS SP8x inverted confocal microscope equipped with a 40X/0.85 objective. Nuclei were stained with DAPI (Life Technologies Ltd) as described previously<sup>74</sup>. GFP was excited at 458 nm with an Argon laser at 20% power. DAPI was excited at 405 nm with an LED diode at 20%.

# *Metabolome analyses*

*A. fumigatus* wild-type and *methH\_tetOFF* strains were incubated in MM for 16 h before the -Dox samples were taken (8 replicates of 11 mL each). Then, 5 µg/mL Dox and 5 mM methionine (to prevent metabolic adaptation due to met auxotrophy) were added as appropriate and the cultures incubated for 6 h, after which the +Dox samples were taken (8 × 11 mL). The samples were immediately quenched with 2× volumes of 60% methanol at -48°C. After centrifugation at 4800 *g* for 10 min at -8°C, metabolites were extracted in 1 mL 80% methanol at -48°C by three cycles of N<sub>2</sub> liquid snap freezing, thawing and vortexing. Supernatant was cleared by centrifugation at -9 °C, 14,500 *g* for 5 min. Quality control (QC) samples were prepared by combining 100 µL from each sample. Samples were aliquoted (300 µL), followed by the addition of 100 µL of the internal standard solution (0.2 mg/mL succinic-*d*<sub>4</sub> acid, and 0.2 mg/mL glycine-*d*<sub>5</sub>) and vortex mix for 15 s. All samples were lyophilised by speed vacuum concentration at room temperature overnight (HETO VR MAXI vacuum centrifuge attached to a Thermo Svart RVT 4104 refrigerated vapour trap; Thermo Life Sciences, Basingstoke, U.K.). A two-step derivatization protocol of methoxyamination followed by trimethylsilylation was employed <sup>82</sup>.

GC-MS analysis was conducted on a 7890B GC coupled to a 5975 series MSD quadrupole mass spectrometer and equipped with a 7693 autosampler (Agilent, Technologies, UK). The sample (1 µL) was injected onto a VF5-MS column (30 m x 0.25 mm x 0.25 µm; Agilent Technologies) with an inlet temperature of 280 °C and a split ratio of 20:1. Helium was used as the carrier gas with a flow rate of 1 mL/min. The chromatography was programmed to begin at

70 °C with a hold time of 4 min, followed by an increase to 300 °C at a rate of 14 °C/min and a final hold time of 4 min before returning to 70 °C. The total run time for the analysis was 24.43 min. The MS was equipped with an electron impact ion source using 70 eV ionisation and a fixed emission of 35 µA. The mass spectrum was collected for the range 50-550 m/z with a scan speed of 3,125 (N=1). Samples were analysed in a randomised order with the injection of a pooled biological quality control sample after every 6th sample injection.

For data analysis, the GC-MS raw files were converted to mzXML and subsequently imported to R. The R package “erah” was employed to de-convolve the GC-MS files. Chromatographic peaks and mass spectra were cross-referenced with the Golm library for putative identification purposes, and followed the metabolomics standards initiative (MSI) guidelines for metabolite identification<sup>83</sup>. The peak intensities were normalised according to the IS (succinic-*d*<sub>4</sub> acid) before being log<sub>10</sub>-scaled for further statistical analysis. All pre-processed data were investigated by employing principal component analysis (PCA)<sup>84</sup>.

The raw data of this metabolome analysis has been deposited in the MetaboLights database<sup>85</sup>, under the reference MTBLS1636 ([www.ebi.ac.uk/metabolights/MTBLS1636](http://www.ebi.ac.uk/metabolights/MTBLS1636))

#### *ATP Quantitation*

*A. fumigatus* was grown as in the metabolome analysis. However, where the effect of SAM was investigated spores were inoculated into MM-N + 1mg/mL aac and 0.5mM SAM was also added at the time of Dox addition. ATP levels were determined using the BacTiter-Glo™ Assay (Promega) following the manufacturer’s instructions and a TriStar LB 941 Microplate Reader (Berthold).

#### *Isolation and detection of SAM*

*A. fumigatus* was grown exactly in the same conditions as described for the metabolome analysis. Harvested mycelia were snap-frozen in liquid N<sub>2</sub> and stored at -70 °C before SAM isolation. SAM extraction was carried out according to<sup>86</sup>. Briefly, frozen mycelia were ground in liquid N<sub>2</sub> and 0.1 M HCl (250 µL) was added to ground mycelia (100 mg). Samples were stored on ice for 1 h, with sample vortexing at regular intervals. Samples were centrifuged at 13,000 *g* for 10 min (4 °C) to remove cell debris and supernatants were collected. Concentration of protein in supernatants was determined using a Biorad Bradford protein assay relative to a bovine serum albumin (BSA) standard curve. Clarified supernatants were adjusted to 15 % (w/v) trichloroacetic acid to remove protein. After 20 min incubation on ice, centrifugation was repeated and clarified supernatants were diluted with 0.1 % (v/v) formic acid. Samples were injected onto a Hypersil Gold aQ C18 column with polar endcapping on a Dionex UltiMate 3000

nanoRSLC with a Thermo Q-Exactive mass spectrometer. Samples were loaded in 100 % Solvent A (0.1 % (v/v) formic acid in water) followed by a gradient to 20 % B (Solvent B: 0.1 % (v/v) formic acid in acetonitrile) over 4 min. Resolution set to 70000 for MS, with MS/MS scans collected using a Top3 method. SAM standard (Sigma) was used to determine retention time and to confirm MS/MS fragmentation pattern for identification. Extracted ion chromatograms were generated at m/z 399-400 and the peak area of SAM was measured. Measurements were taken from three biological and two technical replicates per sample, normalized to the protein concentration in the extracts from each replicate. SAM levels are expressed as a percentage relative to the parental strain in the absence of Dox.

#### *Biomass measurement*

Conidia were inoculated into MM-S, supplemented with either methionine or sulfate, and incubated at 37°C 180 rpm for 12, 16 or 24 h. After this initial incubation, 3 mL samples were taken in triplicate from the cultures, filtered through tared Miracloth, dried at 60°C for 16 h and their biomass measured. In treated conditions Dox was added to a final concentration of 1 µg/mL and the culture allowed to grow for a further 24 h at 37°C 180 rpm. 5 mL samples were taken in triplicate and their biomass measured as above.

#### *Galleria mellonella infections*

Sixth-stage instar larval *G. mellonella* moths (15 to 25 mm in length) were ordered from the Live Foods Company (Sheffield, United Kingdom). Infections were performed according to Kavanagh and Fallon<sup>87</sup>. Randomly selected groups of 15 larvae were injected in the last left proleg with 10 µL of a suspension of 5×10<sup>4</sup> conidia/mL in PBS, using Braun Omnican 50-U 100 0.5- mL insulin syringes with integrated needles. Dox was administered according to the treatment shown in Fig. S7A, alternating injections in the last right and left prolegs. In each experiment an untouched and a saline injected control were included, to verify that mortality was not due to the health status of the larvae or the injection method. Three independent experiments were carried out. The presented survival curves display the pooled data, which was analysed with the Log-Rank test.

#### *Leukopenic murine model of invasive pulmonary aspergillosis and calculation of fungal burden.*

All experiments were performed under United Kingdom Home Office project license PDF8402B7 and approved by the University of Manchester Ethics Committee. Outbred CD1 male mice (22–26 g) were purchased from Charles Rivers and left to rest for at least 1 week before the experiment. Mice were allowed access *ad libitum* to water and food throughout the experiment. Mice were immunosuppressed with 150 mg/kg of cyclophosphamide on days -3 and -1 and with

250 mg/kg cortisone acetate on day -1. On day 0 mice were anesthetized with isoflurane and intranasally infected with a dose of  $10^5$  conidia (40  $\mu$ L of a freshly harvested spore solution of  $2.5 \times 10^6$  conidia/mL). Dox was administered according to the treatment shown in Fig. S7B. Dox containing food was purchased from Envigo (Safe-diet U8200 Version 0115 A03 0.625 g/kg Doxycycline Hyclate pellets). At the selected time-point (72 h after infection for fungal burden) mice were sacrificed by a lethal injection of pentobarbital, the lungs harvested and immediately frozen.

Frozen lungs were lyophilised for 48 h in a CoolSafe ScanVac freeze drier connected to a VacuuBrand pump and subsequently ground in the presence of liquid nitrogen. DNA was isolated from the powder using the DNeasy Blood & Tissue Kit (Qiagen). DNA concentration and quality was measured using a NanoDrop 2000 (ThermoFisher Scientific). To detect the fungal burden, 500 ng of DNA extracted from each infected lung were subjected to qPCR. Primers used to amplify the *A. fumigatus*  $\beta$ -tubulin gene (AFUA\_7G00250) were forward, 5'-ACTTCCGCAATGGACGTTAC-3', and reverse, 5'-GGATGTTGTTGGGAATCCAC-3'. Those designed to amplify the murine actin locus (NM\_007393) were forward, 5'-CGAGCACAGCTTCTTTGCAG-3' and reverse, 5'-CCCATGGTGTCCGTTCTGA-3'. Standard curves were calculated using different concentrations of fungal and murine gDNA pure template. Negative controls containing no template DNA were subjected to the same procedure to exclude or detect any possible contamination. Three technical replicates were prepared for each lung sample. qPCRs were performed using the 7500 Fast Real-Time PCR system (Thermo Fisher Scientific) with the following thermal cycling parameters: 94 °C for 2 min and 40 cycles of 94°C for 15 s and 59°C for 1 min. The fungal burden was calculated by normalising the number of fungal genome equivalents (i.e. number of copies of the tubulin gene) to the murine genome equivalents in the sample (i.e number of copies of the actin gene)<sup>88</sup>. Two independent experiments were carried out ( $n=9$ , 5 mice in the first and 4 mice in the second experiment). Burdens for each strain were compared using a Mann Whitney test.

#### *Molecular homology models and virtual screening*

The full-length sequence for AFUA\_4G07360, the cobalamin-independent methionine synthase MetH from *A. fumigatus* (AfMetH) was obtained from FungiDB (<https://fungidb.org/fungidb>)<sup>89</sup>. This sequence together with the structure of the *C. albicans* orthologue (CaMetH) (PDB ID: 4L65, DOI: 10.1016/j.jmb.2014.02.006) were used to create the molecular homology model in Modeller (version 9.23)<sup>90</sup> with the basic option mode. The AfMetH model was then used for virtual screening with the semi-automated pipeline VSpice<sup>91</sup>. For comparison we also performed virtual screening with the structure of the human methionine synthase (hMS)

containing the folate and homocysteine binding domains (PDB ID: 4CCZ). Docking was done using the Maybridge Ro3 1000 fragment library with AutoDock Vina<sup>92</sup>. Results were inspected graphically using PyMol (v1.8.0.3 Enhanced for Mac OS X (Schrödinger). All images were produced with PyMol.

#### *Nuclei isolation*

Protoplasts were generated as in *A. fumigatus* transformations<sup>76</sup> and nuclei isolated were isolated by sucrose gradient fractionation as previously described by Sperling and Grunstein<sup>93</sup>. Nuclear localisation of GFP-tagged target proteins was confirmed by Western-blot. Aliquots of nuclei were boiled for 5 minutes in loading buffer (0.2 M Tris-HCl, 0.4 M DTT, 8% SDS, trace bromophenol blue) and separated on a 12% (w/v) SDS-PAGE gel. The proteins were transferred to a Polyvinylidene difluoride (PVDF) membrane using the Trans-Blot® Turbo™ Transfer System (Bio-Rad). Detection of GFP was carried out with a rabbit polyclonal anti-GFP antiserum (Bio-Rad) and anti-rabbit IgG HRP-linked antibody (Cell Signalling Technology). SuperSignal West Pico PLUS Chemiluminescent Substrate (Thermo Scientific) and the ChemiDoc XRS+ Imaging System (Biorad) were used to visualise immunoreactive bands. Ponceau S staining was performed to normalize the Western-blot signal to the protein loading.



## ACKNOWLEDGEMENTS

We acknowledge the use of the Phenotyping Center at Manchester (PCAM) for the use of their microscopes and advanced image analysis workstations. We are grateful to Prof Sven Krappmann for critical reading of the manuscript and his constant support. We would like to thank all members of MFIG for constant help and encouragement.

JA was supported by a MRC Career Development Award (MR/N008707/1). JS was supported by a BSAC scholarship (bsac-2016-0049). BPT was supported by a MRC Doctoral Training Partnership PhD studentship. Q-Exactive mass spectrometer and nanoLC instrumentation were funded by a competitive infrastructure award from Science Foundation Ireland (SFI) (12/RI/2346(3)).

## AUTHOR CONTRIBUTION

JS performed the majority of experiments, analysed and interpreted most of the data and participated in the design of the project. MS helped with the acquisition and analysis of most of the experiments. BT run the structural-based virtual screening. RAO measured SAM levels in mycelia. HMA performed the metabolomic experiment, analysed and with RG interpreted the data. RFG assisted with the mouse models of infection. RT helped with the execution of qPCRs. KH helped to set up the GC-MS instrument. SD designed the MS/MS analysis of SAM. RG designed the metabolome analysis and interpreted the data. LT designed the virtual screening analysis and interpreted the data. EB participated in the design and conception of the project. JA conceived and designed the project and analysed most of the data.

## COMPETING INTERESTS

The authors declare no competing interests.

## DATA AVAILABILITY

The raw data that support the findings of this study are available upon reasonable request to the authors. The raw data of metabolome analysis has been deposited in the MetaboLights database<sup>85</sup>, under the reference MTBLS1636 ([www.ebi.ac.uk/metabolights/MTBLS1636](http://www.ebi.ac.uk/metabolights/MTBLS1636)).

## REFERENCES

- 1 Fisher, M. C., Hawkins, N. J., Sanglard, D. & Gurr, S. J. Worldwide emergence of resistance to antifungal drugs challenges human health and food security. *Science* **360**, 739-742, doi:10.1126/science.aap7999 (2018).
- 2 Bongomin, F., Gago, S., Oladele, R. O. & Denning, D. W. Global and Multi-National Prevalence of Fungal Diseases—Estimate Precision. *Journal of Fungi* **3**, 57, doi:10.3390/jof3040057 (2017).
- 3 Bitar, D. *et al.* Population-based analysis of invasive fungal infections, France, 2001-2010. *Emerging Infectious Diseases* **20**, 1149-1155, doi:10.3201/eid2007.140087 (2014).
- 4 Brown, G. D. *et al.* Hidden killers: human fungal infections. *Science Translational Medicine* **4** (2012).
- 5 Nyazika, T. K. *et al.* *Cryptococcus neoformans* population diversity and clinical outcomes of HIV-associated cryptococcal meningitis patients in Zimbabwe. - PubMed - NCBI. *J Med Microbiol* **65**, 1281-1288 (2016).
- 6 Patterson, T. F. *et al.* Executive Summary: Practice Guidelines for the Diagnosis and Management of Aspergillosis: 2016 Update by the Infectious Diseases Society of America. *Clin Infect Dis* **63**, 433-442, doi:10.1093/cid/ciw444 (2016).
- 7 Pound, M. W., Townsend, M. L., Dimondi, V., Wilson, D. & Drew, R. H. Overview of treatment options for invasive fungal infections. *Med Mycol* **49**, 561-580, doi:10.3109/13693786.2011.560197 (2011).
- 8 Ghannoum, M. A. & Rice, L. B. Antifungal agents: mode of action, mechanisms of resistance, and correlation of these mechanisms with bacterial resistance. *Clin Microbiol Rev* **12**, 501-517 (1999).
- 9 Verweij, P. E., Chowdhary, A., Melchers, W. J. G. & Meis, J. F. Azole Resistance in *Aspergillus fumigatus*: Can We Retain the Clinical Use of Mold-Active Antifungal Azoles? *Clin Infect Dis* **62**, 362-368, doi:10.1093/cid/civ885 (2016).
- 10 Amich, J. & Krappmann, S. Deciphering metabolic traits of the fungal pathogen *Aspergillus fumigatus*: redundancy vs. essentiality. *Frontiers in Microbiology Fungi and Their Interactions* (2012).
- 11 Kaltdorf, M. *et al.* Systematic Identification of Anti-Fungal Drug Targets by a Metabolic Network Approach. *Front Mol Biosci* **3**, 22, doi:10.3389/fmolb.2016.00022 (2016).
- 12 Oliver, J. D. *et al.* F901318 represents a novel class of antifungal drug that inhibits dihydroorotate dehydrogenase. *P Natl Acad Sci USA* **113**, 12809-12814, doi:10.1073/pnas.1608304113 (2016).

786 13 Evans, J. C. *et al.* Structures of the N-terminal modules imply large domain motions  
787 during catalysis by methionine synthase. *P Natl Acad Sci USA* **101**, 3729-3736,  
788 doi:10.1073/pnas.0308082100 (2004).

789 14 Peariso, K., Zhou, Z. H. S., Smith, A. E., Matthews, R. G. & Penner-Hahn, J. E.  
790 Characterization of the zinc sites in cobalamin-independent and cobalamin-dependent  
791 methionine synthase using zinc and selenium X-ray absorption spectroscopy.  
792 *Biochemistry-Us* **40**, 987-993, doi:10.1021/bi001711c (2001).

793 15 Gonzalez, J. C., Banerjee, R. V., Huang, S., Sumner, J. S. & Matthews, R. G. Comparison  
794 of cobalamin-independent and cobalamin-dependent methionine synthases from  
795 *Escherichia coli*: two solutions to the same chemical problem. *Biochemistry-Us* **31**, 6045-  
796 6056, doi:10.1021/bi00141a013 (1992).

797 16 Matthews, R. G. *et al.* Cobalamin-dependent and cobalamin-independent methionine  
798 synthases: Are there two solutions to the same chemical problem? *Helv Chim Acta* **86**,  
799 3939-3954, doi:DOI 10.1002/hlca.200390329 (2003).

800 17 Amich, J. *et al.* Exploration of Sulfur Assimilation of *Aspergillus fumigatus* Reveals  
801 Biosynthesis of Sulfur-Containing Amino Acids as a Virulence Determinant. *Infect Immun*  
802 **84**, 917-929, doi:10.1128/IAI.01124-15 (2016).

803 18 Kaldorf, M. *et al.* Systematic Identification of Anti-Fungal Drug Targets by a Metabolic  
804 Network Approach. *Frontiers in Molecular Biosciences* **3**,  
805 doi:doi:10.3389/fmolb.2016.00022 (2016).

806 19 Segal, E. S. *et al.* Gene Essentiality Analyzed by In Vivo Transposon Mutagenesis and  
807 Machine Learning in a Stable Haploid Isolate of *Candida albicans*. *MBio* **9**,  
808 doi:10.1128/mBio.02048-18 (2018).

809 20 Suliman, H. S., Appling, D. R. & Robertus, J. D. The gene for cobalamin-independent  
810 methionine synthase is essential in *Candida albicans*: a potential antifungal target. *Arch*  
811 *Biochem Biophys* **467**, 218-226, doi:10.1016/j.abb.2007.09.003 (2007).

812 21 Pascon, R. C., Ganous, T. M., Kingsbury, J. M., Cox, G. M. & McCusker, J. H. *Cryptococcus*  
813 *neoformans* methionine synthase: expression analysis and requirement for virulence.  
814 *Microbiology* **150**, 3013-3023, doi:10.1099/mic.0.27235-0 (2004).

815 22 Li, W. *et al.* The EMBL-EBI bioinformatics web and programmatic tools framework.  
816 *Nucleic Acids Res* **43**, W580-584, doi:10.1093/nar/gkv279 (2015).

817 23 McWilliam, H. *et al.* Analysis Tool Web Services from the EMBL-EBI. *Nucleic Acids Res*  
818 **41**, W597-600, doi:10.1093/nar/gkt376 (2013).

819 24 Miwa, G. T. in *Enzyme Inhibition in Drug Discovery and Development: The Good and the*  
820 *Bad* (eds C. Lu & A.P. Li ) Ch. 1, 1-14 (Wiley Online Library 2010).

821 25 Cook, D. *et al.* Lessons learned from the fate of AstraZeneca's drug pipeline: a five-  
822 dimensional framework. *Nat Rev Drug Discov* **13**, 419-431, doi:10.1038/nrd4309 (2014).

823 26 Wanka, F. *et al.* Tet-on, or Tet-off, that is the question: Advanced conditional gene  
824 expression in *Aspergillus*. *Fungal Genet Biol* **89**, 72-83, doi:10.1016/j.fgb.2015.11.003  
825 (2016).

826 27 Scott, J. *et al.* *Pseudomonas aeruginosa*-Derived Volatile Sulfur Compounds Promote  
827 Distal *Aspergillus fumigatus* Growth and a Synergistic Pathogen-Pathogen Interaction  
828 That Increases Pathogenicity in Co-infection. *Front Microbiol* **10**, 2311,  
829 doi:10.3389/fmicb.2019.02311 (2019).

830 28 Luccock, M. Folic acid: nutritional biochemistry, molecular biology, and role in disease  
831 processes. *Mol Genet Metab* **71**, 121-138, doi:10.1006/mgme.2000.3027 (2000).

832 29 Tzin, V. & Galili, G. The Biosynthetic Pathways for Shikimate and Aromatic Amino Acids  
833 in *Arabidopsis thaliana*. *Arabidopsis Book* **8**, e0132, doi:10.1199/tab.0132 (2010).

834 30 Deakova, Z., Durackova, Z., Armstrong, D. W. & Lehotay, J. Two-dimensional high  
835 performance liquid chromatography for determination of homocysteine, methionine  
836 and cysteine enantiomers in human serum. *J Chromatogr A* **1408**, 118-124,  
837 doi:10.1016/j.chroma.2015.07.009 (2015).

838 31 Elshorbagy, A. K., Jerneren, F., Samocha-Bonet, D., Refsum, H. & Heilbronn, L. K. Serum  
839 S-adenosylmethionine, but not methionine, increases in response to overfeeding in  
840 humans. *Nutr Diabetes* **6**, doi:ARTN e19210.1038/nutd.2015.44 (2016).

841 32 Jochim, A. *et al.* Methionine Limitation Impairs Pathogen Expansion and Biofilm  
842 Formation Capacity. *Appl Environ Microbiol* **85**, doi:10.1128/AEM.00177-19 (2019).

843 33 Ubhi, D., Kago, G., Monzingo, A. F. & Robertus, J. D. Structural analysis of a fungal  
844 methionine synthase with substrates and inhibitors. *J Mol Biol* **426**, 1839-1847,  
845 doi:10.1016/j.jmb.2014.02.006 (2014).

846 34 Sahu, U. *et al.* Methionine synthase is localized to the nucleus in *Pichia pastoris* and  
847 *Candida albicans* and to the cytoplasm in *Saccharomyces cerevisiae*. *J Biol Chem* **292**,  
848 14730-14746, doi:10.1074/jbc.M117.783019 (2017).

849 35 Fujita, Y., Ukena, E., Iefuji, H., Giga-Hama, Y. & Takegawa, K. Homocysteine accumulation  
850 causes a defect in purine biosynthesis: further characterization of *Schizosaccharomyces*  
851 *pombe* methionine auxotrophs. *Microbiology* **152**, 397-404, doi:10.1099/mic.0.28398-0  
852 (2006).

853 36 Gems, D., Johnstone, I. L. & Clutterbuck, A. J. An autonomously replicating plasmid  
854 transforms *Aspergillus nidulans* at high frequency. *Gene* **98**, 61-67,  
855 doi:https://doi.org/10.1016/0378-1119(91)90104-J (1991).

856 37 Aleksenko, A. Y. & Clutterbuck, A. J. Recombinational stability of replicating plasmids in  
857 *Aspergillus nidulans* during transformation, vegetative growth and sexual reproduction.  
858 *Current Genetics* **28**, 87-93, doi:10.1007/BF00311886 (1995).

859 38 Paul, S., Klutts, J. S. & Moyer-Rowley, W. S. Analysis of promoter function in *Aspergillus*  
860 *fumigatus*. *Eukaryot Cell* **11**, 1167-1177, doi:10.1128/EC.00174-12 (2012).

861 39 Christopher, S. A., Melnyk, S., James, S. J. & Kruger, W. D. S-adenosylhomocysteine, but  
862 not homocysteine, is toxic to yeast lacking cystathionine beta-synthase. *Mol Genet*  
863 *Metab* **75**, 335-343, doi:10.1016/S1096-7192(02)00003-3 (2002).

864 40 Perna, A. F. *et al.* Possible mechanisms of homocysteine toxicity. *Kidney Int Suppl*, S137-  
865 140, doi:10.1046/j.1523-1755.63.s84.33.x (2003).

866 41 Bretes, E. & Zimny, J. Homocysteine thiolactone affects protein ubiquitination in yeast.  
867 *Acta Biochim Pol* **60**, 485-488 (2013).

868 42 Jakubowski, H. Pathophysiological consequences of homocysteine excess. *J Nutr* **136**,  
869 1741S-1749S (2006).

870 43 Lopez-Ibanez, J., Pazos, F. & Chagoyen, M. MBROLE 2.0-functional enrichment of  
871 chemical compounds. *Nucleic Acids Research* **44**, W201-W204, doi:10.1093/nar/gkw253  
872 (2016).

873 44 Chong, J. *et al.* MetaboAnalyst 4.0: towards more transparent and integrative  
874 metabolomics analysis. *Nucleic Acids Research* **46**, W486-W494,  
875 doi:10.1093/nar/gky310 (2018).

876 45 Xia, J. G., Psychogios, N., Young, N. & Wishart, D. S. MetaboAnalyst: a web server for  
877 metabolomic data analysis and interpretation. *Nucleic Acids Research* **37**, W652-W660,  
878 doi:10.1093/nar/gkp356 (2009).

879 46 Fendt, S. M. & Sauer, U. Transcriptional regulation of respiration in yeast metabolizing  
880 differently repressive carbon substrates. *BMC Syst Biol* **4**, 12, doi:10.1186/1752-0509-4-  
881 12 (2010).

882 47 Akita, O., Nishimori, C., Shimamoto, T., Fujii, T. & Iefuji, H. Transport of pyruvate in  
883 *Saccharomyces cerevisiae* and cloning of the gene encoded pyruvate permease. *Biosci*  
884 *Biotechnol Biochem* **64**, 980-984, doi:10.1271/bbb.64.980 (2000).

885 48 Forte, G. M. *et al.* Import of extracellular ATP in yeast and man modulates AMPK and  
886 TORC1 signalling. *J Cell Sci* **132**, doi:10.1242/jcs.223925 (2019).

887 49 Gorman, M. W., Feigl, E. O. & Buffington, C. W. Human plasma ATP concentration. *Clin*  
888 *Chem* **53**, 318-325, doi:10.1373/clinchem.2006.076364 (2007).

889 50 Ito, S., Furuya, K., Sokabe, M. & Hasegawa, Y. Cellular ATP release in the lung and airway.  
890 *Aims Biophys* **3**, 571-584, doi:10.3934/biophys.2016.4.571 (2016).

891 51 Mortaz, E. *et al.* ATP in the pathogenesis of lung emphysema. *Eur J Pharmacol* **619**, 92-  
892 96, doi:10.1016/j.ejphar.2009.07.022 (2009).

893 52 Riteau, N. *et al.* Extracellular ATP Is a Danger Signal Activating P2X(7) Receptor in Lung  
894 Inflammation and Fibrosis. *Am J Resp Crit Care* **182**, 774-783, doi:10.1164/rccm.201003-  
895 0359OC (2010).

896 53 Walvekar, A. S., Srinivasan, R., Gupta, R. & Laxman, S. Methionine coordinates a  
897 hierarchically organized anabolic program enabling proliferation. *Mol Biol Cell*,  
898 mbcE18080515, doi:10.1091/mbc.E18-08-0515 (2018).

899 54 De Virgilio, C. & Loewith, R. The TOR signalling network from yeast to man. *Int J Biochem*  
900 *Cell Biol* **38**, 1476-1481, doi:10.1016/j.biocel.2006.02.013 (2006).

901 55 Loewith, R. & Hall, M. N. Target of rapamycin (TOR) in nutrient signaling and growth  
902 control. *Genetics* **189**, 1177-1201, doi:10.1534/genetics.111.133363 (2011).

903 56 Saxton, R. A. & Sabatini, D. M. mTOR Signaling in Growth, Metabolism, and Disease. *Cell*  
904 **168**, 960-976, doi:10.1016/j.cell.2017.02.004 (2017).

905 57 Thiepold, A. L. *et al.* Mammalian target of rapamycin complex 1 activation sensitizes  
906 human glioma cells to hypoxia-induced cell death. *Brain* **140**, 2623-2638,  
907 doi:10.1093/brain/awx196 (2017).

908 58 Tsouko, E. *et al.* Regulation of the pentose phosphate pathway by an androgen receptor-  
909 mTOR-mediated mechanism and its role in prostate cancer cell growth. *Oncogenesis* **3**,  
910 e103, doi:10.1038/oncsis.2014.18 (2014).

911 59 Baldin, C. *et al.* Comparative proteomics of a tor inducible *Aspergillus fumigatus* mutant  
912 reveals involvement of the Tor kinase in iron regulation. *Proteomics* **15**, 2230-2243,  
913 doi:10.1002/pmic.201400584 (2015).

914 60 Caza, M. & Kronstad, J. W. The cAMP/Protein Kinase a Pathway Regulates Virulence and  
915 Adaptation to Host Conditions in *Cryptococcus neoformans*. *Front Cell Infect Microbiol*  
916 **9**, 212, doi:10.3389/fcimb.2019.00212 (2019).

917 61 Grosse, C., Heinekamp, T., Knemeyer, O., Gehrke, A. & Brakhage, A. A. Protein kinase A  
918 regulates growth, sporulation, and pigment formation in *Aspergillus fumigatus*. *Appl*  
919 *Environ Microbiol* **74**, 4923-4933, doi:10.1128/AEM.00470-08 (2008).

920 62 Gerke, J., Bayram, O. & Braus, G. H. Fungal S-adenosylmethionine synthetase and the  
921 control of development and secondary metabolism in *Aspergillus nidulans*. *Fungal*  
922 *Genet Biol* **49**, 443-454, doi:10.1016/j.fgb.2012.04.003 (2012).

923 63 Bauer, I. *et al.* The Lysine Deacetylase RpdA Is Essential for Virulence in *Aspergillus*  
924 *fumigatus*. *Frontiers in Microbiology* **10**, doi:ARTN 277310.3389/fmicb.2019.02773  
925 (2019).



926 64 Stewart, J. I. P. *et al.* Reducing *Aspergillus fumigatus* Virulence through Targeted  
927 Dysregulation of the Conidiation Pathway. *mBio* **11**, doi:10.1128/mBio.03202-19 (2020).

928 65 Grenier, D., Huot, M. P. & Mayrand, D. Iron-chelating activity of tetracyclines and its  
929 impact on the susceptibility of *Actinobacillus actinomycetemcomitans* to these  
930 antibiotics. *Antimicrob Agents Chemother* **44**, 763-766, doi:10.1128/aac.44.3.763-  
931 766.2000 (2000).

932 66 Peng, Y., Zhang, H., Xu, M. & Tan, M. W. A Tet-Off gene expression system for validation  
933 of antifungal drug targets in a murine invasive pulmonary aspergillosis model. *Sci Rep* **8**,  
934 443, doi:10.1038/s41598-017-18868-9 (2018).

935 67 Ferrer, J. L., Ravanel, S., Robert, M. & Dumas, R. Crystal structures of cobalamin-  
936 independent methionine synthase complexed with zinc, homocysteine, and  
937 methyltetrahydrofolate. *J Biol Chem* **279**, 44235-44238, doi:10.1074/jbc.C400325200  
938 (2004).

939 68 Warnock, D. W., Johnson, E. M., Burke, J. & Prachartam, R. Effect of methotrexate alone  
940 and in combination with antifungal drugs on the growth of *Candida albicans*. *J*  
941 *Antimicrob Chemother* **23**, 837-847, doi:10.1093/jac/23.6.837 (1989).

942 69 Yang, J. X., Wan, Z., Wang, X. H., Liu, W. & Li, R. Y. In Vitro Interactions Between  
943 Antifungals and Methotrexate Against *Aspergillus spp.* *Mycopathologia* **168**, 237-242,  
944 doi:10.1007/s11046-009-9218-4 (2009).

945 70 Fan, C. C., Vitols, K. S. & Huennekens, F. M. Inhibition of dihydrofolate reductase by  
946 methotrexate: a new look at an old problem. *Adv Enzyme Regul* **18**, 41-52,  
947 doi:10.1016/0065-2571(80)90007-2 (1980).

948 71 Woodcock, D. M. *et al.* Quantitative evaluation of *Escherichia coli* host strains for  
949 tolerance to cytosine methylation in plasmid and phage recombinants. *Nucleic Acids Res*  
950 **17**, 3469-3478 (1989).

951 72 Amich, J., Schafferer, L., Haas, H. & Krappmann, S. Regulation of sulphur assimilation is  
952 essential for virulence and affects iron homeostasis of the human-pathogenic mould  
953 *Aspergillus fumigatus*. *PLoS Pathog* **9**, e1003573, doi:10.1371/journal.ppat.1003573  
954 (2013).

955 73 Wood, W. B. Host specificity of DNA produced by *Escherichia coli*: bacterial mutations  
956 affecting the restriction and modification of DNA. **16**, 118-133 (1966).

957 74 Reverberi, M., MSmith, C.AZjalic, SScarpri, MScala, VCardinali, GAspite, NPinzari,  
958 FPayne, G.AFabbri, A.AFanelli, C. How Peroxisomes Affect Aflatoxin Biosynthesis  
959 in *Aspergillus Flavus*. *PLoS ONE* **7**, e48097 (2012).



960 75 da Silva Ferreira, M. E. *et al.* The akuB(KU80) mutant deficient for nonhomologous end  
961 joining is a powerful tool for analyzing pathogenicity in *Aspergillus fumigatus*. *Eukaryot*  
962 *Cell* **5**, 207-211, doi:10.1128/EC.5.1.207-211.2006 (2006).

963 76 Szewczyk, E. *et al.* Fusion PCR and gene targeting in *Aspergillus nidulans*. *Nature*  
964 *Protocols* **1**, 3111, doi:10.1038/nprot.2006.405 (2006).

965 77 Kafer, E. Meiotic and mitotic recombination in *Aspergillus* and its chromosomal  
966 aberrations. *Adv Genet* **19**, 33-131 (1977).

967 78 Sambrook, J., Fritsch, E. F. & Maniatis, T. *Molecular Cloning: A Laboratory Manual*.  
968 (1989).

969 79 Kolar, M., Punt, P. J., van den Hondel, C. A. & Schwab, H. Transformation of *Penicillium*  
970 *chrysogenum* using dominant selection markers and expression of an *Escherichia coli*  
971 *lacZ* fusion gene. *Gene* **62**, 127-134 (1988).

972 80 Southern, E. Southern blotting. *Nat Protoc* **1**, 518-525 (2006).

973 81 Southern, E. M. Detection of specific sequences among DNA fragments separated by gel  
974 electrophoresis. *J Mol Biol* **98**, 503-517 (1975).

975 82 Wedge, D. C. *et al.* Is Serum or Plasma More Appropriate for Intersubject Comparisons  
976 in Metabolomic Studies? An Assessment in Patients with Small-Cell Lung Cancer. *Anal*  
977 *Chem* **83**, 6689-6697, doi:10.1021/ac2012224 (2011).

978 83 Sumner, L. W. *et al.* Proposed minimum reporting standards for chemical analysis.  
979 *Metabolomics* **3**, 211-221, doi:10.1007/s11306-007-0082-2 (2007).

980 84 Gromski, P. S. *et al.* A tutorial review: Metabolomics and partial least squares-  
981 discriminant analysis - a marriage of convenience or a shotgun wedding. *Anal Chim Acta*  
982 **879**, 10-23, doi:10.1016/j.aca.2015.02.012 (2015).

983 85 Haug, K. *et al.* MetaboLights: a resource evolving in response to the needs of its scientific  
984 community. *Nucleic Acids Res* **48**, D440-D444, doi:10.1093/nar/gkz1019 (2020).

985 86 Owens, R. A. *et al.* Interplay between Gliotoxin Resistance, Secretion, and the  
986 Methyl/Methionine Cycle in *Aspergillus fumigatus*. *Eukaryot Cell* **14**, 941-957,  
987 doi:10.1128/EC.00055-15 (2015).

988 87 Kavanagh, K. & Fallon, J. P. *Galleria mellonella* larvae as models for studying fungal  
989 virulence. *Fungal Biol Rev* **24**, 79-83 (2010).

990 88 Gago, S. *et al.* Development and validation of a quantitative real-time PCR assay for the  
991 early diagnosis of coccidioidomycosis. *Diagn Microbiol Infect Dis* **79**, 214-221,  
992 doi:10.1016/j.diagmicrobio.2014.01.029 (2014).

993 89 Stajich, J. E. *et al.* FungiDB: an integrated functional genomics database for fungi. *Nucleic*  
994 *Acids Res* **40**, D675-681, doi:10.1093/nar/gkr918 (2012).

995 90 Fiser, A. & Sali, A. MODELLER: Generation and refinement of homology-based protein  
996 structure models. *Method Enzymol* **374**, 461-491, doi:Doi 10.1016/S0076-  
997 6879(03)74020-8 (2003).

998 91 Alvarez-Carretero, S., Pavlopoulou, N., Adams, J., Gilsenan, J. & Tabernero, L. VSpipe, an  
999 Integrated Resource for Virtual Screening and Hit Selection: Applications to Protein  
1000 Tyrosine Phosphatase Inhibition. *Molecules* **23**, doi:ARTN  
1001 35310.3390/molecules23020353 (2018).

1002 92 Trott, O. & Olson, A. J. Software News and Update AutoDock Vina: Improving the Speed  
1003 and Accuracy of Docking with a New Scoring Function, Efficient Optimization, and  
1004 Multithreading. *J Comput Chem* **31**, 455-461, doi:10.1002/jcc.21334 (2010).

1005 93 Sperling, A. S. & Grunstein, M. Histone H3 N-terminus regulates higher order structure  
1006 of yeast heterochromatin. *Proceedings of the National Academy of Sciences of the*  
1007 *United States of America* **106**, 13153-13159 (2009).

Fig. 1

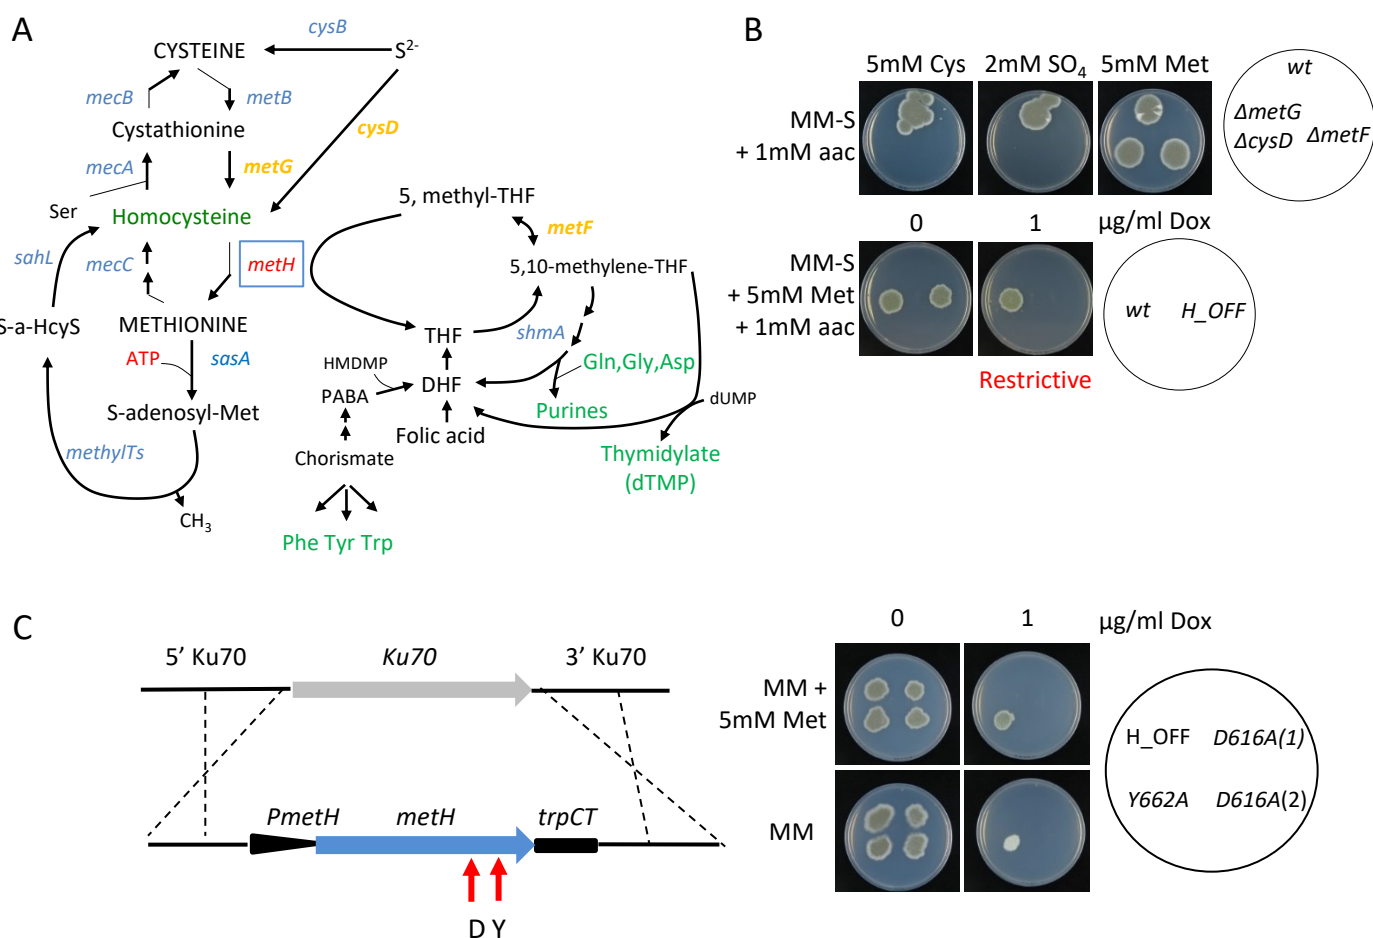

**Figure 1. Methionine synthase (MetH) enzymatic activity is essential for *A. fumigatus* viability.**

**A)** Schematic representation of the trans-sulfuration pathway and its intersection with the one carbon metabolic route. **B)** Both strains, a  $\Delta metF$  mutant (which blocks the one carbon metabolism route) and a  $\Delta metG\Delta cysD$  mutant (which blocks the trans-sulfuration pathway) could grow in the presence of methionine. In contrast, the *metH\_tetOFF* strain (*H\_OFF*) could not grow in restrictive conditions (+Dox) even if methionine was supplemented. The phenotypic analysis was repeated in three independent experiments. Representative plates are shown. **C)** A second copy of the *metH* gene under the control of its own promoter was introduced in the innocuous *Ku70* locus of the *H\_OFF* background strain. Two point-mutated versions of the gene were introduced, one that causes a D→A substitution in amino acid 616 and another one that causes a Y→A substitution in amino acid 662. In non-restrictive conditions all strains were able to grow as the parental *H\_OFF* strain. In the presence of Dox and absence of met, the Y662A protein was able to trigger significant growth, suggesting that its enzymatic activity is impaired but not blocked. In the presence of Met the Y662A strain grew as well in restrictive as in non-restrictive conditions, suggesting that partial enzymatic activity is sufficient to cover the essential function of MetH. In restrictive conditions and absence of methionine, the D616A strain was not able to grow, indicating that enzymatic activity is blocked in this mutated protein. The D616A was also not able to grow in the presence of Dox and met, indicating that enzymatic activity is required for the essential function of MetH. The phenotypic analysis was repeated in three independent experiments. Representative plates are shown.

Fig. 2

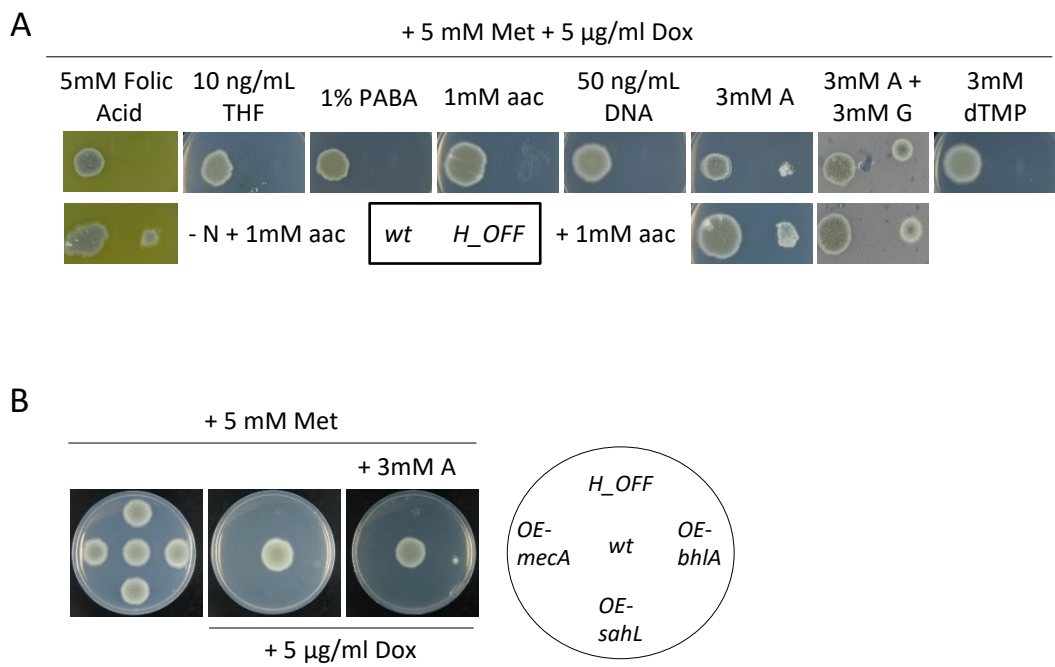

**Figure 2. Shortage of important downstream metabolites, but not toxic accumulation of homocysteine, partially accounts for MetH essentiality.**

**A)** Supplementation of the growth media with a variety of downstream metabolites (Fig. 1A) showed that purines (adenine A and guanine G, 3 mM) could slightly reconstitute growth of the *H\_OFF* strain in restrictive conditions. Further supplementation of amino acids improves growth, but not to the wild-type levels. Folic acid (5 mM) could also reconstitute growth when amino acids are the only N-source. **B)** Overexpression of genes that could detoxify a potential accumulation of homocysteine did not reconstitute growth in the absence of MetH activity. Further addition of adenine did not improve growth. The phenotypic analyses were repeated in three independent experiments. Representative plates are shown.

**Fig. 3**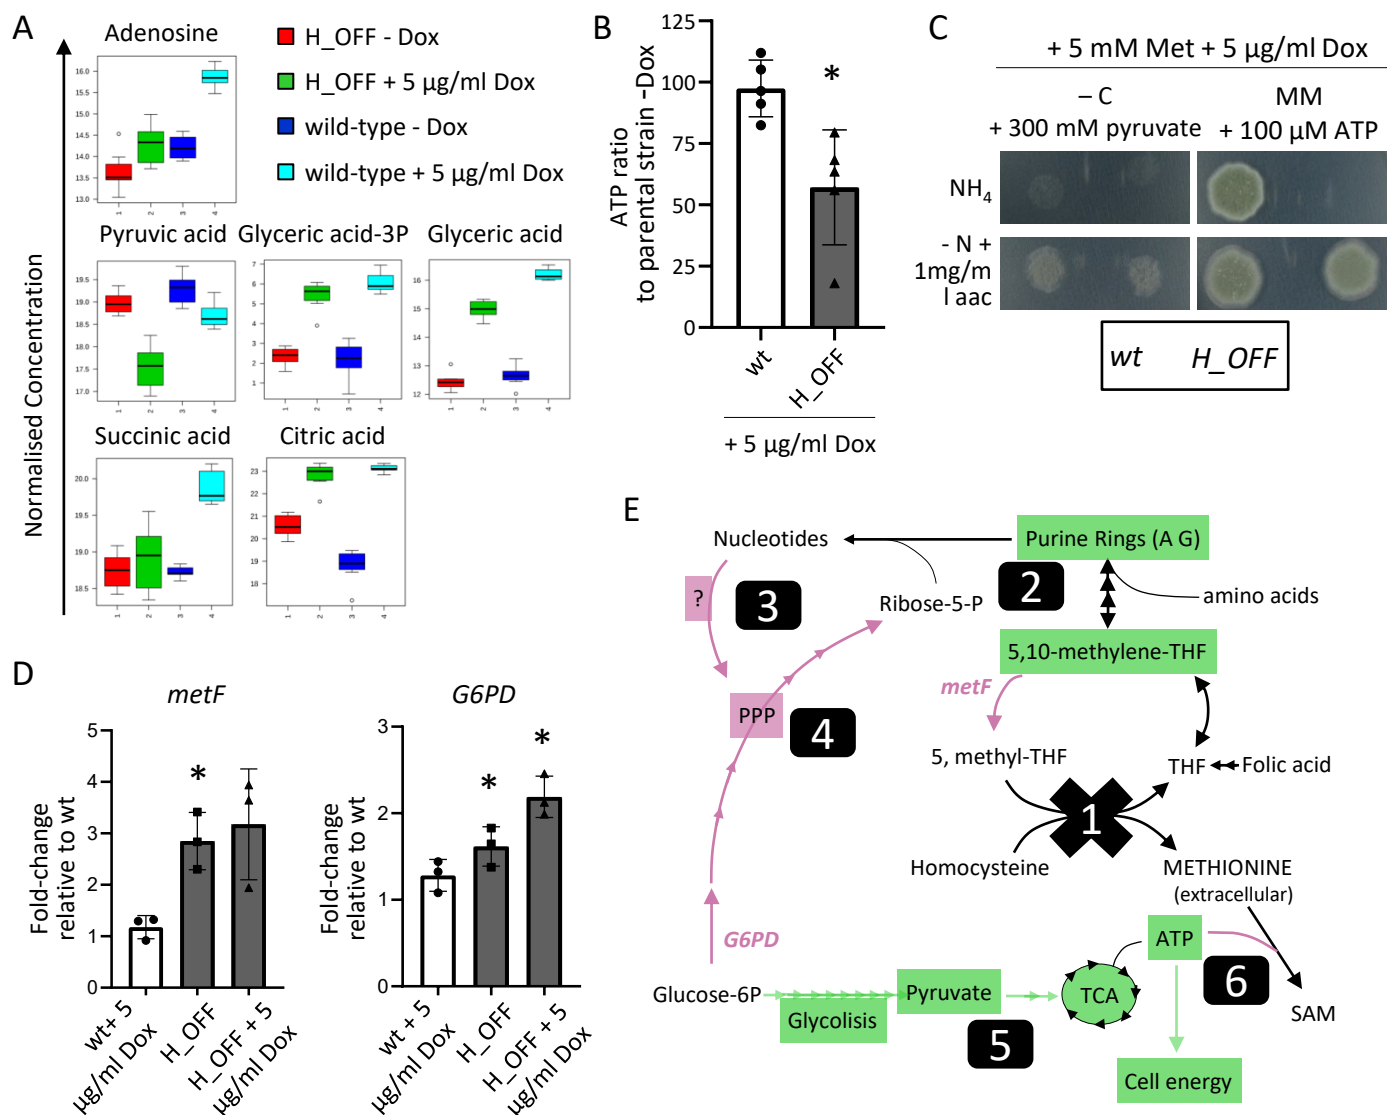**Figure 3. Lack of methionine synthase activity causes a decrease in cell energetics.**

**A** Normalized concentrations of metabolites in fungal mycelia ( $n=8$ ). Adenosine levels were decreased in *H\_OFF*+Dox compared with *wt*+Dox, which agrees with its capacity to partially reconstitute growth. Several metabolites of the glycolysis and TCA pathways were reduced in *H\_OFF*+Dox compared with *wt*+Dox, suggesting low energetic levels. **B** The levels of ATP significantly decreased in the *H\_OFF* strain upon Dox addition, whilst they did not vary significantly in the *wt* strain. Each point represents a biological replicate, which was assayed with three technical replicates. Data was analysed using one sample *t*-test to a hypothetical value of 100 (i.e. no change in ratio of ATP). Graph displays the mean and standard deviation. **C** Pyruvate as the sole carbon source could reconstitute growth of the *H\_OFF* strain in restrictive conditions to wild-type levels. For both strains, growth was limited and slightly improved in the presence of amino acids. ATP could fully reconstitute growth of *H\_OFF* when amino acids were the sole N-source. The phenotypic analyses were repeated in three independent experiments. Representative plates are shown. **D** RT-PCR calculation of the fold-change in genetic expression of *metF* and *G6PD* with respect to their expression in wild-type without Dox. Each point represents a biological replicate which was analysed with three technical replicates. Data was analysed using one sample *t*-test to a hypothetical value of 1 (i.e. no change in expression). Graphs display the mean and standard deviation.

**E)** Schematic representation of the metabolic imbalance started with MetH repression (1). Lack of the enzymatic activity caused a shortage of 5,10-methylene-THF and consequently of purine rings (2). This was sensed as a shortage of nucleotides that the cell attempted to compensate through an unknown mechanism, seemingly TOR and PKA independent (3), that activated glucose flow through the Pentose Phosphate Pathway (PPP) (4). That caused a reduction of glycolysis and TCA cycles, which in turn decreased ATP levels (5). ATP usage for *S*-adenosylmethionine (SAM) synthesis was maintained, which caused a drop in cell energy that resulted in growth arrest (6). Genes/pathways/compounds expected to be reduced are highlighted in green and those increased in magenta.

**Fig. 4**

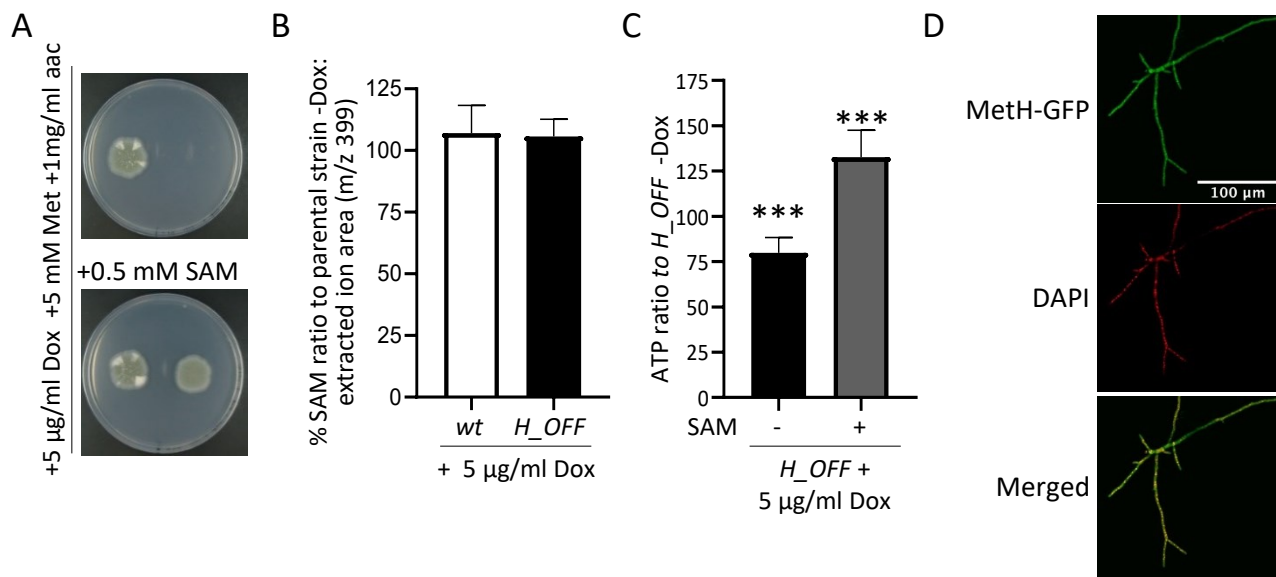

**Figure 4. External S-adenosylmethionine (SAM) reconstitutes ATP levels and growth.**

**A)** Addition of SAM to the medium reconstituted growth of the *H\_OFF* strain in restrictive conditions. The phenotypic analysis was repeated in two independent experiments. Representative plates are shown. **B)** Levels of SAM did not significantly decrease upon Dox administration (5  $\mu\text{g/ml}$ ) in wild-type or *H\_OFF* strains. Graphs depict mean and SD of three biological and two technical replicates. Data were analysed using one-way ANOVA with Bonferroni post-tests adjustment. **C)** Presence of SAM in the medium (0.5 mM) prevented the decrease in ATP levels observed in the *H\_OFF* strain upon Dox addition. In fact, ATP levels were increased compared to the minus Dox condition. Graphs depict mean and SD of two biological and four technical replicates. **D)** Expression of MetH-GFP in the *H\_OFF* background showed that the protein localised both in cytoplasm and nucleus.



Fig. 5

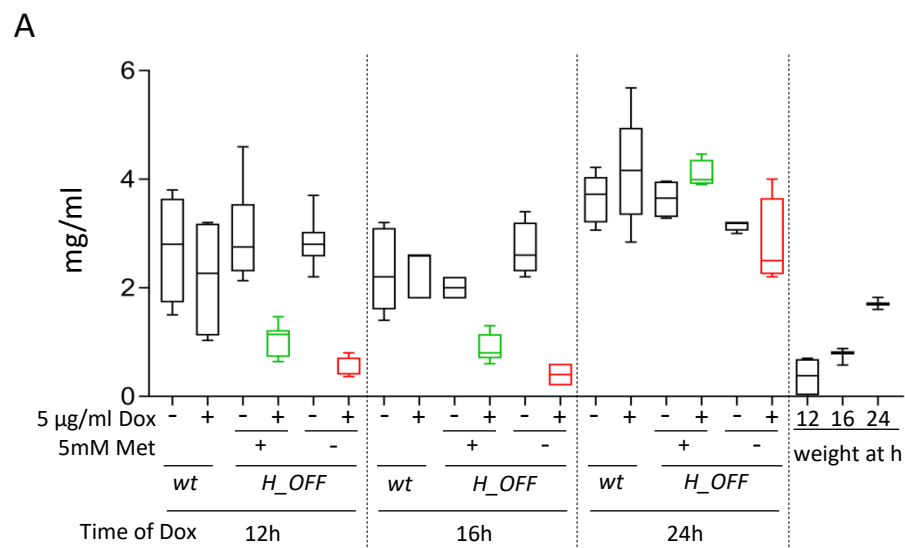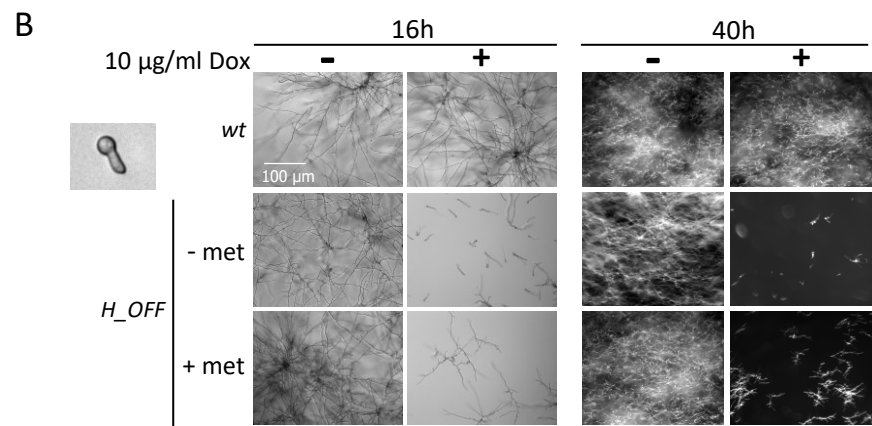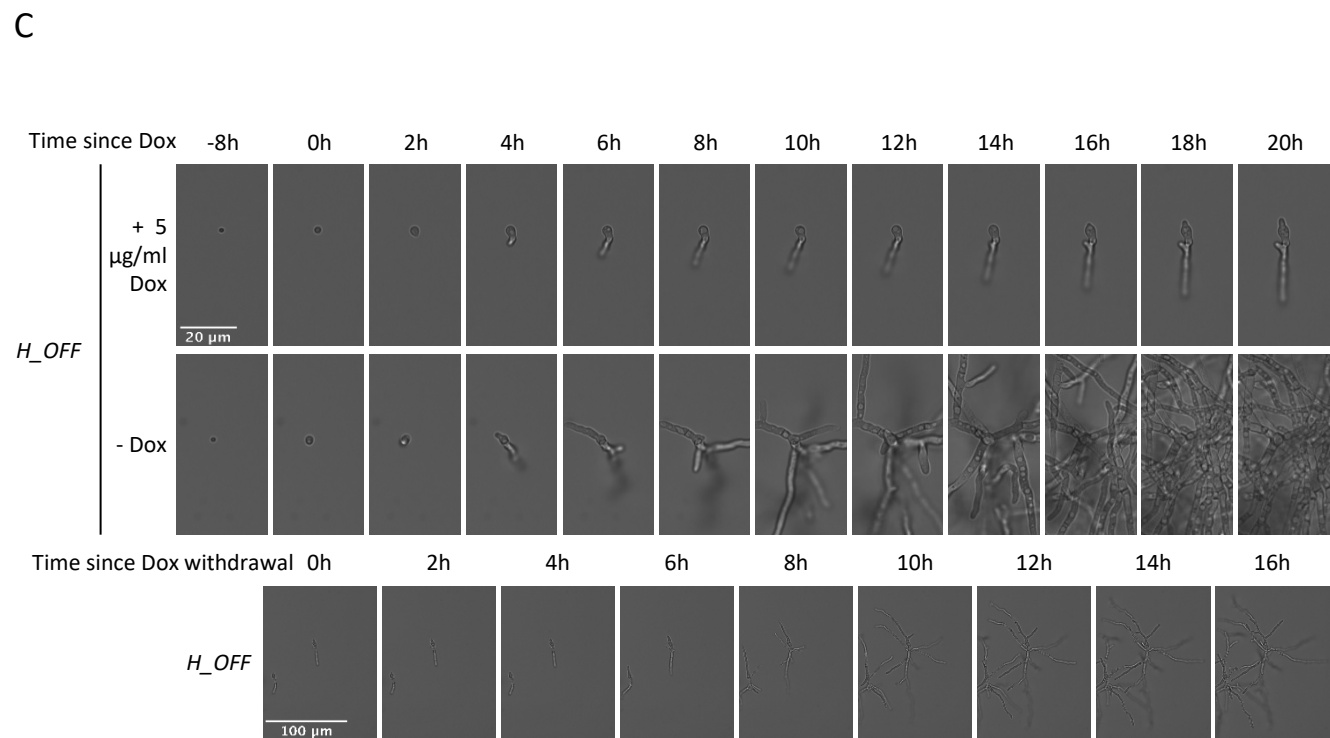

**Figure 5. Repression of *metH* transcription causes inhibition of growth *in vitro*.**

**A)** Addition of 1 µg/mL Dox to 12 and 16 h grown mycelia strongly reduced fungal biomass, measured 24 h later. This was more pronounced in media without methionine. The effect was lost when Dox was added 24 h after inoculation. For comparison, fungal biomass of mycelia harvested at the time of Dox addition (12, 16 and 24 h post-inoculation) is shown. Three independent experiments were performed, using 3 technical replicates for each. **B)** Microscopic images of 8 h germinated spores treated with 10 µg/mL Dox. Images were taken 16 h after Dox addition (wide-field microscopy) and again 24 h later (stereomicroscopy). Dox addition halts growth of *H\_OFF* strain in a sustained manner. **C)** Time-lapse microscopy of *H\_OFF* growth upon Dox addition. Dox was added to 8 h grown conidia, which caused growth inhibition that was obvious after ~4 h. Growth was virtually halted for as long as Dox was present. **D)** ~6 h after Dox withdrawal, *H\_OFF* growth resumed, showing that the effect was fungistatic.

Fig. 6

A

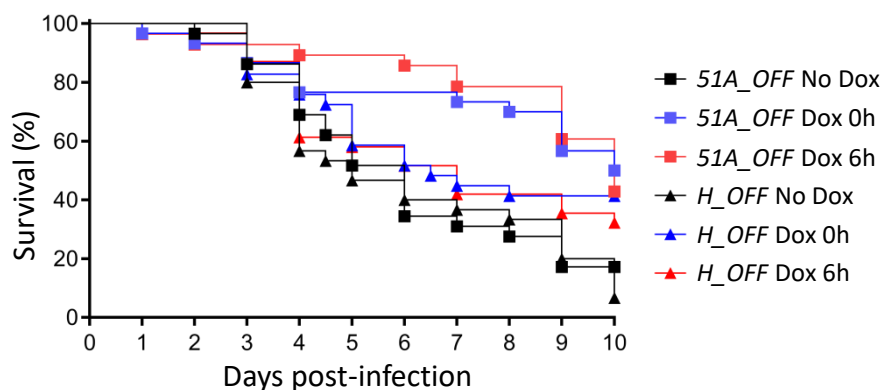

B

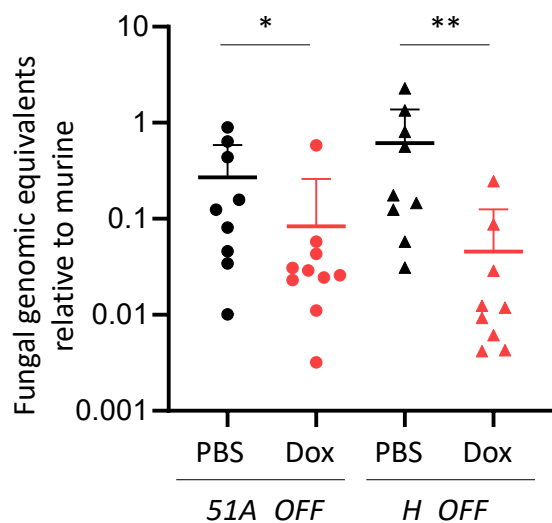

**Figure 6. Downregulation of *metH* in vivo in established infections shows a beneficial effect comparable to the target of azoles.**

**A)** Administration of a Dox regimen (Fig. S8A) to *Galleria mellonella* infected with either the *H\_OFF* strain or the *51A\_OFF* control strain showed a beneficial effect in survival. For both strains, starting regimen at the time of infection triggered a significant improvement in survival (50% VS 17.2% for *51A\_OFF*,  $P=0.0036$ , and 41.45% VS 6.67% for *H\_OFF*,  $P=0.022$ ). Dox regimen 6 h after infection also triggered a significant improvement in survival for both strains (42.8% VS 17.2% for *51A\_OFF*,  $P=0.0007$ , and 32.26% VS 6.67% for *H\_OFF*,  $P=0.0324$ ). The curves show the pooled data from 3 independent experiments. Curves were compared using the Log-Rank test. **B)** Leukopenic mice were infected with *51A\_OFF* or *H\_OFF* and a Dox regimen (Fig. S8B) administered 16 h after infection. Upon Dox treatment, fungal burden in the lungs was significantly reduced for both strains ( $P=0.0279$  for *51A\_OFF* and  $P=0.0019$  for *H\_OFF*). Two independent experiment were carried out. Each point in the graphs represents one mouse ( $n=9$ ). Burdens for each strain were compared using a Mann Whitney test.

Fig. 7

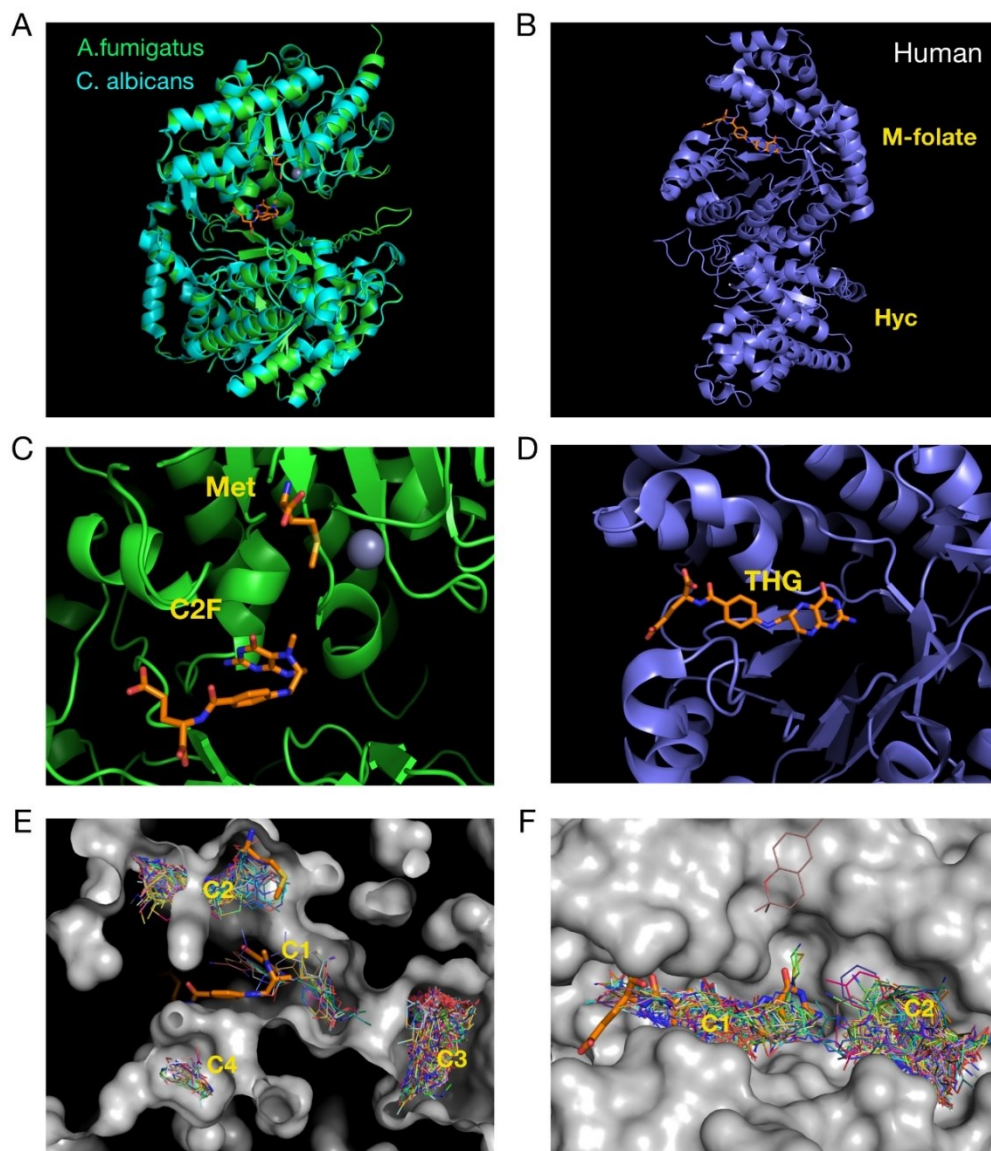

**Figure 7. Virtual-screening of fungal and human methionine synthases reveals different druggability of the proteins.**

**A)** The structures of the crystallized *C. albicans* and the predicted *A. fumigatus* methionine synthases are highly similar. **B)** In contrast, the structure of the human enzyme is very different, having the 5-methyl-tetrahydrofolate and homocysteine binding sites separated. **C)** Detail of the active site of fungal methionine synthases, with the methionine, folate and zinc displayed. **D)** Tetrahydrofolate binding site of the human protein. **E)** Virtual screening on the *A. fumigatus* protein found four ligand binding clusters in the structure, two of which (C1, C2) match the binding position of the 5-methyl-tetrahydrofolate and the methionine. **F)** In the human enzyme two clusters were found, one (C1) that overlaps with the tetrahydrofolate binding site and (another C2) in a nearby pocket.
