1 Targeting methionine synthase in a fungal pathogen causes a metabolic imbalance that  
2 impacts cell energetics, growth and virulence

3

4 Jennifer Scott<sup>1</sup>, Monica Sueiro-Olivares<sup>1</sup>, Benjamin P. Thornton<sup>2</sup>, Rebecca A. Owens<sup>3</sup>, Howbeer  
5 Muhamadali<sup>4</sup>, Rachael Fortune-Grant<sup>1</sup>, Darren Thomson<sup>1</sup>, Riba Thomas<sup>1</sup>, Katherine Hollywood<sup>5</sup>,  
6 Sean Doyle<sup>3</sup>, Royston Goodacre<sup>4</sup>, Lydia Tabernero<sup>2</sup>, Elaine Bignell<sup>1</sup> and Jorge Amich<sup>1\*</sup>

7

- 8 1. Manchester Fungal Infection Group (MFIG), Division of Infection, Immunity and  
9 Respiratory Medicine, School of Biological Sciences, Faculty of Biology, Medicine and  
10 Health, University of Manchester, Manchester Academic Health Science Centre,  
11 Manchester, UK.
- 12 2. School of Biological Sciences, Faculty of Biology, Medicine and Health, University of  
13 Manchester, Manchester Academic Health Science Centre, Manchester, UK.
- 14 3. Department of Biology, Maynooth University, Co. Kildare, Ireland.
- 15 4. Department of Biochemistry, Institute of Integrative Biology, University of Liverpool,  
16 Liverpool, UK.
- 17 5. Manchester Institute of Biotechnology. University of Manchester, Manchester, UK.

18

19

20

21 \*Corresponding author: [jorge.amichelias@manchester.ac.uk](mailto:jorge.amichelias@manchester.ac.uk)

22

23

24

25

26

27

28

29 **ABSTRACT**

30 There is an urgent need to develop novel antifungals to tackle the threat fungal pathogens pose  
31 to human health. In this work, we have performed a comprehensive characterisation and  
32 validation of the promising target methionine synthase (MetH). We uncover that in *Aspergillus*  
33 *fumigatus* the absence of this enzymatic activity triggers a metabolic imbalance that causes a  
34 reduction in intracellular ATP, which prevents fungal growth even in the presence of methionine.  
35 Interestingly, growth can be recovered in the presence of certain metabolites, which evidences  
36 that *metH* is a conditionally essential gene. As this implies that for a correct validation MetH  
37 should be targeted in established infections, we have validated the use of the tetOFF genetic  
38 model for fungal research and optimised its performance to mimic treatment of established  
39 infections. We show that repression of *metH* in growing hyphae halts growth *in vitro*, which  
40 translates into a beneficial effect when targeting established infections using this model *in vivo*.  
41 Finally, a structural-based virtual screening of methionine synthases reveals key differences  
42 between the human and fungal structures and unravels features in the fungal enzyme that can  
43 guide the design of novel specific inhibitors. Therefore, methionine synthase is a valuable target  
44 for the development of new antifungals.

45 **IMPORTANCE**

46 Fungal pathogens are responsible for millions of life-threatening infections on an annual basis  
47 worldwide. The current repertoire of antifungal drugs is very limited and, worryingly, resistance  
48 has emerged and already become a serious threat to our capacity to treat fungal diseases. The  
49 first step to develop new drugs often is to identify molecular targets which inhibition during  
50 infection can prevent pathogen growth. However, the current models are not suitable to  
51 validate targets in established infections. Here we have characterised the promising antifungal  
52 target methionine synthase in great detail, using the prominent fungal pathogen *Aspergillus*  
53 *fumigatus* as a model. We have uncovered the underlying reason for its essentiality and  
54 confirmed its druggability. Furthermore, we have optimised the use of a genetic system to show  
55 a beneficial effect of targeting methionine synthase in established infections. Therefore, we  
56 believe that antifungal drugs to target methionine synthase should be pursued and additionally,  
57 we propose that antifungal targets should be validated in a model of established infection.

58

59

60

61

## 62 INTRODUCTION

63 Fungal pathogens represent an increasing risk to human health (1), with over one billion people  
64 worldwide affected by mycoses annually. Many of these mycoses are superficial infections of  
65 the skin, nails or mucosal membranes and although troublesome are usually not life-  
66 threatening. However, some fungi cause devastating chronic and invasive fungal infections,  
67 which result in an estimated 1.6 million deaths per year (2). Incidences of invasive infections  
68 caused by *Aspergillus*, *Candida*, *Cryptococcus* and *Pneumocystis* species are increasing (3), a  
69 cause for serious concern as these genera are responsible for 90% of deaths caused by mycoses  
70 (4). Despite the availability of antifungal drugs, mortality rates for invasive aspergillosis, invasive  
71 candidiasis, cryptococcal meningitis and *Pneumocystis jirovecii* pneumonia are intolerably high,  
72 reaching over 80%, 40%, 50% and 30% respectively (2, 5). There are currently only four classes  
73 of antifungals in clinical use to treat invasive infections (azoles, echinocandins, polyenes and  
74 flucytosine), all suffering from pharmacological drawbacks including toxicity, drug-drug  
75 interactions and poor bioavailability (6, 7). With the sole exemption of flucytosine, which is only  
76 used in combinatory therapy with amphotericin B for cryptococcal meningitis and *Candida*  
77 endocarditis (7), the current antifungals target critical components of the fungal cell membrane  
78 or cell wall (8), which represents a very limited druggable space. The rise of antifungal resistance  
79 presents an additional challenge as mortality rates in patients with resistant isolates can reach  
80 100%, making the development of new antifungal drugs increasingly critical for human health  
81 (1, 9). Targeting fungal primary metabolism is broadly considered a valid strategy for the  
82 development of novel antifungals, as it is crucial for pathogen virulence and survival (10, 11). A  
83 primary example of success of this strategy is olorofim (F901318), a novel class of antifungal that  
84 targets the pyrimidine biosynthesis pathway (12), which is currently in clinical trials.

85 Methionine synthases catalyse the transfer of a methyl group from *N*<sup>5</sup>-methyl-5,6,7,8-  
86 tetrahydrofolate (CH<sub>3</sub>-THF) to L-homocysteine (Hcy). Two unrelated protein families catalyse  
87 this reaction: cobalamin dependent methionine synthases (EC 2.1.1.13) and cobalamin  
88 independent methionine synthases (EC 2.1.1.14). Members of both families must catalyse the  
89 transfer of a low active methyl group from the tertiary amine, CH<sub>3</sub>-THF, to a relatively weak  
90 nucleophile, Hcy sulfur. Cobalamin dependent enzymes facilitate this transfer by using  
91 cobalamin as an intermediate methyl carrier (13). By contrast, cobalamin independent enzymes  
92 directly transfer the methyl group from CH<sub>3</sub>-THF to Hcy (14). Logically, proteins of each family  
93 differ significantly both at amino acid sequence (15) and 3D structure level (16).

94 We have previously shown that the methionine synthase-encoding gene is essential for *A.*  
95 *fumigatus* viability and virulence, which led us to propose it as a promising target for antifungal

96 drug development (17). In support of this, a systematic metabolic network analysis by Kaldorf  
97 and colleagues identified methionine synthase as a promising antifungal drug target worthy of  
98 investigation (11). Methionine synthase has also been described as essential for *Candida*  
99 *albicans* viability (18, 19) and necessary for *Cryptococcus neoformans* pathogenicity (20), which  
100 suggests that a drug developed against this enzyme may have a broad spectrum of action.  
101 Moreover, fungal methionine synthases are cobalamin independent, differing significantly from  
102 the cobalamin dependent human protein at the amino acid sequence level: only 11.2% identity,  
103 20.4% similarity and 60.2% gaps when aligned the *A. fumigatus* and human proteins using L-  
104 Align from EMBL (21, 22). Therefore, it should be possible to develop drugs with low toxicity  
105 potential.

106 Target validation is critical and has been suggested as the most important step in translating  
107 a new potential target into a viable drug target because of its role in achieving efficacy in patients  
108 (23). Indeed a retrospective analysis from AstraZeneca's drug pipeline showed that projects that  
109 had performed a more thorough target validation were less likely to fail: 73% of the projects  
110 were active or successful in Phase II compared with only 43% of projects without such extra  
111 target validation (24). Therefore, in this work we aimed to further substantiate methionine  
112 synthase's potential as an antifungal drug target, before advancing the drug discovery process.  
113 In particular, we were interested in 1) unravelling the mechanistic basis of methionine synthase  
114 essentiality in *A. fumigatus*, which is needed to fully explore the potential of this enzyme as drug  
115 target and to be able to anticipate drug resistance mechanisms; and 2) developing *in vivo* models  
116 of infection to mimic treatment against the target in an established infection and using them to  
117 validate methionine synthase as an antifungal drug target.

118

## 119 **RESULTS AND DISCUSSION**

### 120 *Methionine synthase enzymatic activity is essential for Aspergillus fumigatus viability*

121 We had previously demonstrated that the methionine synthase encoding gene is essential for  
122 *A. fumigatus* viability and virulence (17); however, the underlying reason for this essentiality was  
123 still unclear. To address this question, here we have constructed strains that express the *metH*  
124 gene under the control of a tetOFF system recently adapted for *Aspergillus* (25) in two different  
125 *A. fumigatus* wild-type backgrounds, ATCC46645 and A1160. The advantage of the tetOFF  
126 system over other regulatable systems is that doxycycline (Dox) can be added to downregulate  
127 gene expression in growing hyphae (Fig. S1A), and thus this system permits investigation of the  
128 consequences of the repression of an essential gene in growing mycelia. The constructed

129 *methH\_tetOFF* strains (*H\_OFF*) grew as the wild type in the absence of Dox, but as little as 0.5  
130  $\mu\text{g/mL}$  was sufficient to completely prevent colony development on an agar plate even in the  
131 presence of methionine (Fig. S1B). This corroborates our previous result that methionine  
132 synthase is essential for *A. fumigatus* viability and that its absence does not result in a sheer  
133 auxotrophy for methionine (17).

134 Methionine synthase forms an interjection between the trans-sulfuration pathway and the  
135 one carbon metabolic route (Fig. 1A), as the enzyme utilizes 5-methyl-tetrahydrofolate as co-  
136 substrate. Therefore, the essentiality of *metH* might be due to required integrities of the trans-  
137 sulfuration pathway or of the one carbon metabolic route. Alternatively, it could be that the  
138 presence of the enzyme itself is essential, either because its enzymatic activity is required or  
139 because it is fulfilling an unrelated additional role, as being part of a multiprotein complex. To  
140 start discerning among these possibilities, we constructed a double  $\Delta\textit{metG}\Delta\textit{cysD}$  mutant,  
141 blocked in the previous step of the trans-sulfuration pathway, and a  $\Delta\textit{metF}$  deletant, which  
142 blocks the previous step of the one-carbon metabolic route (Fig. 1A). As we had previously  
143 observed (26), to rescue fully  $\Delta\textit{metF}$ 's growth the media had to be supplemented with  
144 methionine and other amino acids, as the folate cycle is necessary for the interconversion of  
145 serine and glycine and plays a role in histidine and aromatic amino acid metabolism (27, 28).  
146 Consequently, we added a mix of all amino acids except cysteine and methionine to the S-free  
147 medium for this experiment. Phenotypic tests (Fig. 1B) confirmed that the  $\Delta\textit{metG}\Delta\textit{cysD}$  and  
148  $\Delta\textit{metF}$  mutants were viable and could grow in the presence of methionine. In contrast, the  
149 *H\_OFF* conditional strain could not grow under restrictive conditions even in the presence of the  
150 amino acid mix and methionine (Fig. 1B). Therefore, the MetH protein itself, and not the integrity  
151 of the trans-sulfuration and one-carbon pathways, is essential for *A. fumigatus* viability.  
152 Interestingly, the methionine auxotroph  $\Delta\textit{metG}\Delta\textit{cysD}$  was avirulent in a leukopenic model of  
153 pulmonary aspergillosis (Fig. S1C), suggesting that the amount of readily available methionine  
154 in the lung is very limited, not sufficient to rescue its auxotrophy. Indeed, the level of methionine  
155 in human serum was calculated to be as low as  $\sim 20 \mu\text{M}$  (29, 30), which was described as  
156 insufficient to support the growth of various auxotrophic bacterial pathogens (31) and we have  
157 also observed that is not enough to rescue growth of the *A. fumigatus*  $\Delta\textit{metG}\Delta\textit{cysD}$  auxotroph.

158 Essentiality of the MetH protein could be directly linked to its enzymatic activity or,  
159 alternatively, the protein could be performing an additional independent function. To discern  
160 between these two possibilities, we constructed two strains that express single-point mutated  
161 versions of MetH from the innocuous *Ku70* locus of the *H\_OFF* background strain, under the  
162 control of its native promoter (Fig. 1C). These point mutations, *methH*<sup>g2042A>2C</sup> (D616A) and

163 *metH*<sup>g2179TA>9GC</sup> (Y662A), were previously described to prevent conformational rearrangements  
164 required for activity of the *C. albicans* methionine synthase (32). In the absence of Dox, these  
165 strains grew normally, as they expressed both the wild-type MetH, from the tetOFF promoter,  
166 and the mutated version of the protein (Fig. 1C). In the presence of Dox, when the wild-type  
167 *metH* gene was downregulated, the Y662A strain grew on sulfate worse than in non-restrictive  
168 conditions, but still to a significant extent, suggesting that this point mutation did not completely  
169 abrogate enzymatic activity (Fig. 1C). Interestingly, Y662 grew normally on methionine, showing  
170 that methionine can compensate for a partial reduction of MetH activity (Fig 1C). The D616A  
171 mutated protein was confirmed to be stable as a GFP-tagged version of this protein could be  
172 visualised in -Dox conditions (Fig. S1D, strain detailed later in the manuscript). Interestingly, the  
173 D616A strain (two isolates were tested) was not able to grow on sulfate (Fig. 1C), demonstrating  
174 that enzymatic activity was fully blocked. Nor could it grow on methionine (Fig. 1C), indicating  
175 that enzymatic activity is required for viability even in the presence of the full protein. All these  
176 phenotypes support the conclusion that methionine synthase enzymatic activity is required for  
177 viability.

178

179 *Absence of methionine synthase enzymatic activity results in a shortage of crucial metabolites,*  
180 *but does not cause toxic accumulation of homocysteine*

181 The absence of methionine synthase enzymatic activity has two direct consequences, which  
182 could cause deleterious effects and therefore explain its essentiality (Fig. 1A). It could cause an  
183 accumulation of the potentially toxic substrate homocysteine and/or a shortage of the co-  
184 product tetrahydrofolate (THF). THF is directly converted to 5,10-methylene-THF, which is  
185 required for the synthesis of purines and thymidylate (TMP), and thus for DNA synthesis;  
186 additionally, as purine biosynthesis requires Gln, Gly and Asp, and THF *de novo* synthesis  
187 requires chorismate (precursor of aromatic amino acids), a shortage of THF might cause a  
188 depletion of amino acids (Fig. 1A). To investigate if the depletion of any of these metabolites  
189 underlies MetH essentiality, we supplemented the media with a number of precursors and  
190 potentially depleted metabolites (Fig. 2A). Added as sole supplement, only adenine was able to  
191 trigger growth, but to a minimal degree. Further addition of a mixture of all amino acids  
192 noticeably improved growth. Supplementation with adenine and guanine (purine bases) did also  
193 reconstitute noticeable growth, which was not enhanced with further addition of amino acids.  
194 Folic acid was also capable of reconstituting growth, but only when amino acids were added as  
195 the sole N-source (Fig. S3). However, no combination of compounds was able to reconstitute  
196 growth to the wild-type level. This suggests that a shortage of relevant metabolites derived from

197 THF, prominently adenine, partially accounts for methionine synthase essentiality, but cannot  
198 explain it completely. In other fungi, as *Pichia pastoris* (33) or *Schizosaccharomyces pombe* (34),  
199 supplementation with methionine and adenine was found to restore growth of a *meth*  
200 mutant to wild-type levels, denoting them as combined auxotrophs. In *A. fumigatus* it seems to  
201 be more complex because supplementation with methionine, adenine and other amino acids  
202 could still not fully restore growth, suggesting that more factors are implicated.

203 To investigate if homocysteine could be accumulating to toxic levels in the absence of MethH  
204 activity, we over-expressed several genes that should alleviate its accumulation. To this aim we  
205 designed and constructed the plasmid pJA49, which allows direct integration of any ORF to  
206 episomally overexpress genes in *A. fumigatus*. Plasmid pJA49 carries the *A. nidulans* AMA1  
207 autologous replicating sequence (35, 36) and the hygromycin B resistance gene (*hygrB*) as a  
208 selection marker. A unique *StuI* restriction site allows introduction of any PCR amplified ORF in  
209 frame under the control of the *A. fumigatus* strong promoter *hspA* (37) and the *A. nidulans* *trpC*  
210 terminator (Fig S2A). Using this plasmid, we produced a strain in the *H\_OFF* background that  
211 episomally overexpresses *mecA*, encoding cystathionine- $\beta$ -synthase, which converts  
212 homocysteine to cystathionine (Fig. 1A). Homocysteine exerts toxic effects through its  
213 conversion to *S*-adenosylhomocysteine, which causes DNA hypomethylation (38, 39), or to  
214 homocysteine thiolactone, which causes *N*-homocysteinylolation at the  $\epsilon$ -amino group of protein  
215 lysine residues (40, 41). Consequently, we also constructed strains that episomally over-express  
216 genes that could detoxify those products: the *S*-adenosyl-homocysteinase lyase encoding gene  
217 *sahL* (AFUA\_1G10130) or the *A. nidulans* homocysteine thiolactone hydrolase encoding gene  
218 *blhA* (AN6399) (*A. fumigatus* genome does not encode any orthologue) (Fig. S2B). However,  
219 despite a strong over-expression of the genes (Fig. S2C&D), none of them could rescue growth  
220 of the *H\_OFF* strain in restrictive conditions (Fig. 2B). Therefore, our over-expression  
221 experiments suggest that homocysteine accumulation is not responsible for *meth* essentiality,  
222 but additional experiments such as quantification homocysteine levels, which are currently  
223 challenging, would be required to further support this hypothesis. Addition of adenine to the  
224 medium did not improve growth of the overexpression strains further than that of the *H\_OFF*  
225 background (Fig. 2B), indicating that methionine synthase essentiality seemingly is not a  
226 combined effect of homocysteine accumulation and depletion of THF-derived metabolites. Toxic  
227 accumulation of homocysteine was speculated to be the underlying reason of methionine  
228 synthase essentiality in both *Candida albicans* and *Cryptococcus neoformans* (19, 20) but our  
229 results suggest that this is not the case in *A. fumigatus*. Therefore, we propose that the previous  
230 assumption should be revisited in other fungal pathogens.

231

232 *Methionine synthase repression triggers a metabolic imbalance that causes a decrease in cell*  
233 *energetics*

234 Aiming to identify any adverse metabolic shift in the absence of MetH and/or accumulation of  
235 toxic compounds that could explain its necessity for proper growth, we performed a  
236 metabolomics analysis, via gas chromatography-mass spectrometry (GC-MS), comparing the  
237 metabolites present in wild-type and *H\_OFF* strains before and 6 h after Dox addition. Before  
238 Dox addition both strains clustered closely together in a Principal Component Analysis (PCA)  
239 scores plot (Fig. S4A), showing that their metabolic profiles are highly similar. However, 6 h after  
240 Dox addition the strains clusters became clearly separated, denoting differential metabolite  
241 content. Analysis of the differentially accumulated metabolites (full list can be consulted in Table  
242 S1) using the online platforms MBRole (42) and Metaboanalyst (43, 44) did not reveal any  
243 obvious metabolic switch, probably due to the rather small number of metabolites that could  
244 be identified by cross-referencing with the Golm library (<http://gmd.mpimp-golm.mpg.de/>).  
245 Manual inspection of the metabolites pointed out interesting aspects. Firstly, the methionine  
246 levels were not significantly different, which demonstrates that methionine supplementation in  
247 the growth medium triggers correct intracellular levels in the *H\_OFF* strain; this undoubtedly  
248 rules out that a shortage of methionine could be the cause of the essentiality of methionine  
249 synthase. Secondly, we detected a significantly lower amount of adenosine in the *H\_OFF* strain  
250 compared with the wild-type after Dox addition (Fig. 3A), which is in agreement with our  
251 previous result that supplementation of adenine can partially reconstitute growth in the  
252 absence of MetH. We did not find accumulation of compounds with a clear toxic potential upon  
253 *metH* repression. Nevertheless, we detected a lower amount of several amino acids (Phe, Ser,  
254 Glu, Pro, Ile, Thr, Ala and Asp, Fig. S4B), which suggests that the cells may enter into growth  
255 arrest upon *metH* repression. Interestingly, we noticed a significantly lower accumulation of  
256 some metabolites of the glycolysis pathway and TCA cycle (Fig. 3A) and some other mono and  
257 poly-saccharides (Fig. S4B). These variations could reflect a low energetic status of the cells upon  
258 *metH* repression. Indeed, we found that the level of ATP significantly decreased in the *H\_OFF*  
259 strain, but not in the wild-type, upon Dox addition (Fig. 3B). Therefore, we evaluated if  
260 supplementation of the medium with substrates that have the potential to increase cell  
261 energetics can rescue *H\_OFF* growth in restrictive conditions. We found that when pyruvate,  
262 which can directly be converted to acetyl-CoA to enter the TCA cycle, was added as the sole  
263 carbon source *H\_OFF* growth was reconstituted in restrictive conditions to the same level as the  
264 wild-type (Fig. 3C). Growth was limited for both strains, as pyruvate does not appear to be a



265 good carbon source (45). However, the presence of glucose in the medium precluded the  
266 reconstitution of growth of *H\_OFF* (Fig. S3), as it has been described to prevent pyruvate uptake  
267 in *S. cerevisiae* (46). We next tested the capacity of ATP to be used as an alternative energy source  
268 and to reconstitute growth. To diversify the presence of permeases in the cell membrane, and  
269 thus maximise the chance of ATP uptake, we assayed two different N-sources: ammonium ( $\text{NH}_4^+$ ,  
270 preferred source) and amino acids (Fig. S3). Indeed, when amino acids were the only N-source,  
271 supplementation of the medium with ATP reconstituted *H\_OFF* growth in restrictive conditions  
272 to wild type levels (Fig. 3C). This agrees with the recent observation that eukaryotic cells can  
273 uptake ATP and exploit it as an energy source (47). In conclusion, a decrease in cell energetics  
274 developed in the absence of methionine synthase seems to explain MetH essentiality for  
275 growth.

276 The fact that growth in the absence of methionine synthase can be reconstituted when there  
277 are sufficient levels of methionine and ATP implies that *metH* is a conditionally essential gene,  
278 meaning that it is only essential in the absence of the specific conditions that overcome the  
279 disturbances derived from its deficiency. We believe that a significant number of genes  
280 previously described as essential in fungi would in fact be conditionally essential, however the  
281 right conditions to reconstitute growth have not been identified in many cases. This highlights a  
282 paramount consideration for the proper identification and validation of drug targets: the  
283 deficiencies introduced by targeting a conditionally essential gene must not be overcome during  
284 infection. This important concept has already been discussed by others (48-51) and we believe  
285 addressing it should become the standard for proper validation of antimicrobial targets. In the  
286 case of methionine synthase, it is unlikely that the fungus could acquire sufficient levels of ATP  
287 (combined with methionine and not using a preferred N-source) in the lung tissue to overcome  
288 the growth defect resulting from targeting MetH. The concentration of free extracellular ATP in  
289 human plasma has been calculated to be in the sub-micromolar range (28-64 nM) (52). In the  
290 lungs, extracellular ATP concentrations must be strictly balanced and increased levels are  
291 implicated in the pathophysiology of inflammatory diseases (53); nevertheless, even in such  
292 cases ATP levels have been calculated in the low micromolar range (54, 55). Despite this low  
293 concentrations and consequently unlikely compensation, we believe that MetH needs to be  
294 validated in a suitable model to confirm that its deficiency cannot be overcome in  
295 established infections.

296 We then questioned how the lack of methionine synthase's enzymatic activity could cause a  
297 drop in cell energy. We hypothesised that blockage of methionine synthase activity likely causes  
298 a forced conversion of 5,10-methylene-THF to 5-methyl-THF by the action of MetF (Fig. 1A). In

299 support of this, we observed that expression of *metF* was increased in the *H\_OFF* strain (Fig. 3D).  
300 This likely causes a shortage of 5,10-methylene-THF, as the conversion is not reversible and THF  
301 cannot be recycled by the action of methionine synthase (Fig. 1A). Indeed, supplementation of  
302 folic acid (only when amino acids are the sole N-source, Fig. S3) and of purines could partially  
303 restore growth (Fig. 2A), as they compensate for the deficit in purine ring biosynthesis when  
304 there is a shortage of 5,10-methylene-THF. However, this still does not explain why there is a  
305 drop in ATP. We hypothesised that the block of purine biosynthesis might be sensed as a  
306 shortage of nucleotides. This could then cause a shift in glucose metabolism from glycolysis and  
307 the TCA cycle (which produce energy) to the Pentose Phosphate Pathway (PPP), which is  
308 required to produce ribose-5-phosphate, an integral part of nucleotides. In a similar vein, it has  
309 recently been described that activation of anabolism in *Saccharomyces cerevisiae* implies  
310 increased nucleotide biosynthesis and consequently metabolic flow through the PPP (56). To  
311 evaluate our hypothesis, we investigated the transcription level of the glucose-6-phosphate  
312 dehydrogenase (G6PD) encoding gene (AFUA\_3G08470), which catalyses the first committed  
313 step of the PPP. In agreement with our hypothesis, the expression of G6PD encoding gene  
314 increases in the *H\_OFF* strain upon addition of Dox (Fig. 3D), likely reflecting an increased flow  
315 through the PPP. We then wondered how cells may be activating the PPP. The target of  
316 rapamycin (TOR) TORC1 effector, which is widely known to activate anabolism and growth (57-  
317 59), has been described to activate the PPP in mammalian cells (60, 61) and has been  
318 functionally connected with energy production and nucleotide metabolism in *A. fumigatus* (62).  
319 In addition, the cAMP/PKA (protein kinase A) pathway is known to be paramount for sensing of  
320 nutrients and the correspondent adaptation of gene expression and metabolism (63), and was  
321 found to be implicated in the regulation of nucleotide biosynthesis in *A. fumigatus* (64).  
322 Consequently, we explored if a partial block of TOR with low concentrations of rapamycin or of  
323 PKA with H-89 could prevent the imbalanced activation of the PPP in the absence of MethH  
324 activity. However, neither of the inhibitors could reconstitute growth of the *H\_OFF* strain in  
325 restrictive conditions (Fig. S4C). This means that neither the TOR nor the PKA pathways seem to  
326 be involved in the deleterious metabolic shift that seemingly activates PPP and decreases flux  
327 through glycolysis. Therefore, more experiments are required to elucidate the mechanism  
328 underlying the metabolic imbalance developed upon *metH* downregulation.

329 In summary, we propose that absence of methionine synthase activity causes a strong defect  
330 in purine biosynthesis that the cell tries to compensate for by shifting carbon metabolism to the  
331 PPP; this metabolic imbalance causes a drop of ATP levels, which collapses cell energetics and  
332 results in halted growth (Fig. 3E).

333 Interestingly, we also detected that *metF* expression is higher in the *H\_OFF* strain compared  
334 to the wild-type, even in the absence of Dox (Fig. 3D). This could be explained as an effort to  
335 compensate a higher demand of 5-methyl-THF by the slightly increased amount of methionine  
336 synthase in this strain (Fig. S1A). This effect could cause a mild defect in purine biosynthesis in  
337 the *H\_OFF* strain, and indeed adenosine content was lower in the *H\_OFF*–Dox condition  
338 compared with the wild-type–Dox sample in the metabolome analysis (Fig 3A). Furthermore,  
339 this also explains why we detected a small but significant increase of G6PD expression in the  
340 *H\_OFF*–Dox condition (Fig. 3D). Therefore, it seems that upregulating methionine synthase has  
341 the potential to cause the same metabolic imbalance as downregulating it. However, the effect  
342 of overexpression (notice that it is only ~1.5 fold in our strain Fig. S1A) is minor and does not  
343 have obvious consequences for growth, as THF can be recycled and thus the shortage of 5,10-  
344 methylene-THF is not severe. In any case, two important points can be highlighted from this  
345 small imbalance. Firstly, methionine synthase activity is very important and must be finely tuned  
346 to maintain a proper metabolic homeostasis. Secondly, changing the expression level of genes  
347 with constitutive and/or regulatable promoters can have unexpected and hidden consequences  
348 that often go unnoticed.

349

#### 350 *Supplementation with S-adenosylmethionine reconstitutes ATP levels and growth*

351 We have shown that the absence of MetH activity causes a reduction in ATP levels. S-  
352 adenosylmethionine (SAM) is produced from methionine and ATP by the action of S-  
353 adenosylmethionine synthetase SasA (Fig. 1A), an essential enzyme in *A. nidulans* (65). Hence,  
354 we reasoned that the absence of MetH activity might cause a decrease in SAM levels. To test  
355 that hypothesis, we first attempted to rescue growth of the *H\_OFF* strain in a medium  
356 supplemented with methionine and SAM. We tested various N-sources to diversify the presence  
357 of permeases in the cell membrane, aiming to maximise the chances of SAM uptake (Fig. S3).  
358 Indeed, the addition of SAM reconstituted growth of the *H\_OFF* strain in restrictive conditions  
359 in the presence of methionine when amino acids were the only N-source (Fig. 4A and S3). We  
360 then measured the intracellular concentration of SAM in growing mycelia upon addition of Dox  
361 using MS/MS. Surprisingly, we observed that addition of Dox to the *H\_OFF* strain did not cause  
362 a significant reduction in SAM levels (Fig. 4B). Consequently, we wondered how the addition of  
363 SAM may reconstitute *H\_OFF* growth if its levels are not reduced upon *metH* repression. We  
364 speculated that as SAM is a crucial molecule it continues to be produced even if the levels of  
365 ATP are reduced, draining it from other cellular processes and thus triggering energy

366 deprivation. In support of this hypothesis, we observed that supplementing SAM to the medium  
367 increased the levels of ATP in growing hyphae (Fig. 4C).

368 As SAM supplementation can reconstitute *H\_OFF* growth, it constitutes another condition  
369 that overcomes the conditional essentiality of *methH*, highlighting again the need to validate  
370 MetH in a model of established infection. The concentration of SAM in human serum is  
371 extremely low, in the range of 100-150 nM (30), and consequently it is unlikely that the fungus  
372 could find sufficient SAM during infection to compensate for the defect in ATP caused by  
373 targeting methionine synthase.

374 S-adenosylmethionine plays a fundamental role as methyl donor for the majority of cellular  
375 methylation reactions, including methylation of DNA. Given the observed importance of SAM in  
376 the absence of MetH activity and considering that in *P. pastoris* and *C. albicans* methionine  
377 synthase was reported to localise in the nucleus, as well as in the cytoplasm (33), we speculated  
378 that nuclear localization might be important for MetH cellular function. To test this hypothesis,  
379 we constructed strains expressing different versions of C-terminus GFP-tagged MetH from the  
380 pJA49 plasmid (Fig. S2) in the *H\_OFF* background. These were a wild-type MetH, a MetH<sup>D616A</sup>  
381 (control of no growth –Fig. 1C & S5A–) and a MetH<sup>R749A</sup> (*methH*<sup>g2439CG>GA</sup>) version of the protein,  
382 which according to the results published for *P. pastoris* should not localise in the nucleus (33).  
383 The strain expressing wild-type MetH grew normally in restrictive conditions (Fig. S5A), proving  
384 that the tagged MetH-GFP protein was active. Importantly, this result also demonstrated that  
385 genetic downregulation of *methH* is the only reason for the lack of growth of the *H\_OFF* strain in  
386 the presence of Dox. We confirmed that *A. fumigatus* MetH localises in both the nucleus and  
387 cytoplasm (Fig 4D & S5B). In contrast to what was described in *P. pastoris*, the MetH<sup>R749A</sup> protein  
388 seems to be active, as it could trigger growth of *H\_OFF* in restrictive conditions (Fig. S5A) and  
389 still localised into the nucleus (Fig. S5B). Therefore, the possibility that MetH localisation in the  
390 nucleus is important needs further exploration.

391

### 392 *Repression of methionine synthase causes growth inhibition in growing mycelia*

393 The major advantage of the tetOFF system is that it can be employed to simulate a drug  
394 treatment before a specific chemical is developed. Addition of Dox to a growing mycelium  
395 downregulates the gene of interest (Fig S1A), mimicking the effect of blocking its product by the  
396 action of a drug. The validity of the Tet systems has recently been questioned, as it has been  
397 reported that Dox can impair mitochondrial function in various eukaryotic models (66).  
398 Nevertheless, existing evidence suggests that low concentrations of Dox ( $\leq 50 \mu\text{g/mL}$ ) have little

399 effect on fungal cells. For instance, in contrast to reports of Dox affecting proliferation of human  
400 cells at low concentrations (66, 67), we and others have not detected negative effects of low  
401 concentrations of Dox or of tetracycline on fungal proliferation (Fig. 5A), phenotype  
402 (macroscopic or microscopic, Fig. 5B) or virulence (17, 68-74). In addition, it was reported that  
403 40 µg/mL of Dox does not affect the transcriptional profile of *S. cerevisiae* (75), which contrasts  
404 with the broad effect caused by only 1 µg/mL Dox on global transcription in human cells (66).  
405 Moreover, a study that investigated the role of various mitochondrial proteins for its function in  
406 *C. albicans* did not observe any negative effect of 20 µg/mL Dox on fungal growth nor on  
407 mitochondrial morphology and function (76). To test the effect of Dox on *A. fumigatus*, we grew  
408 the wild-type strain overnight in various concentrations of drug and imaged mitochondria using  
409 the Rhodamine 123 dye (Fig S6). It was previously described that inhibition of translation in  
410 mitochondrial (mechanism of Dox toxicity) promotes mitochondrial fission, which can be  
411 detected as a more fragmented, punctuate, mitochondrial appearance compared to the healthy  
412 tubular morphology (66, 76). This fragmented phenotype started to appear, although there was  
413 variation among hyphae, when the fungus was incubated in 100 µg/mL Dox and became obvious  
414 when it was incubated in 1000 µg/mL Dox (Fig. S6). In contrast, in low concentrations of Dox (1  
415 and 10 µg/mL Dox) the mitochondria showed a healthy tubular morphology, indistinguishable  
416 from that of no Dox (Fig. S6). Therefore, low concentrations of Dox do not affect mitochondria  
417 morphology and thus likely do not impair their function. In fact, we have also observed that  
418 addition of 5 µg/mL Dox to wild-type mycelium did not affect the ATP content (Fig 3B), further  
419 supporting the conclusion that mitochondrial function is not impaired. Therefore, even if higher  
420 concentrations of Dox have a negative effect on fungal cells (70, 74), its impact at low  
421 concentrations on fungal cells seems to be minimal. Consequently, we argue that as long as the  
422 concentration of Dox used is  $\leq 50$  µg/mL, the tetOFF system can be utilised to investigate the  
423 consequences of downregulating gene expression in fungal research.

424 To investigate the effect of downregulating *metH* for mycelial growth, we added Dox to 12,  
425 16 or 24 h grown submerged mycelia and left it incubating for an additional 24 h. Addition of  
426 Dox to 12 or 16 h grown mycelia severely impaired growth of the *H\_OFF* strain but not the wt,  
427 as observed by biomass (Fig. 5A) and OD (Fig. S7A) measurements. This effect was lost when  
428 Dox was added to 24 h grown mycelia, due to the incapacity of Dox to reach and downregulate  
429 expression in all cells within the dense mass of an overgrown mycelium. Interestingly, Dox  
430 addition to methionine free media stopped *H\_OFF* growth immediately, which can be observed  
431 by comparing fungal biomass at the time of Dox addition to the measurement 24 h after Dox  
432 addition. In contrast, the fungus inoculated in methionine containing media grew a little further

433 after Dox addition (Fig. 5A). To understand this difference, we added Dox to either resting or 8  
434 h germinated conidia and imaged them 16 and 40 h after drug addition (Fig. 5B & Fig. S7B). In  
435 agreement with the previous result, we observed that Dox addition in methionine free medium  
436 inhibited growth immediately: resting conidia did not germinate and germinated conidia did not  
437 elongate the germtube. In contrast, after addition of Dox in methionine containing medium,  
438 most of the resting conidia were still able to germinate and some germlings could elongate the  
439 germinated tubes to form short hyphae. This suggests that the drop in ATP levels takes ~3-4 h  
440 before having an effect on growth. Importantly, once growth was inhibited, the effect was  
441 sustained for a long period, as we could not detect further growth up to 40 h post-inoculation.  
442 To corroborate these observations and further determine whether the effect of growth is  
443 fungistatic or fungicidal in the long term, we performed a time-lapse analysis of the effects of  
444 adding Dox to 8 h swollen conidia and its subsequent withdrawal after 16 h of incubation (Fig.  
445 5C and Video 1). We observed that growth was inhibited ~4 h after Dox addition and almost  
446 completely halted after 6 h, which was sustained as long as the drug was present. Upon  
447 withdrawal of Dox, growth resumes within 6 h (Fig 5D and Video S1), showing that the effect of  
448 blocking MetH is fungistatic, at least with the genetic TeOFF model of *metH* repression. As  
449 expected Dox had no effect on wild-type growth (Video S2).

450

#### 451 *Targeting MetH in established infections interferes with the progression of disease*

452 We previously used the TetON system to investigate the relevance of MetH in *A. fumigatus*  
453 virulence (17). In this model, *metH* gene expression was active when mice were fed with Dox,  
454 which resulted in full virulence of the *metH\_tetON* strain (demonstrating that the concentration  
455 of Dox reached in murine tissues does not impact fungal virulence). In the absence of Dox the  
456 gene was not expressed, which completely abrogated virulence. This proved that the murine  
457 lung does not readily provide the conditions to overcome the conditional essentiality of *metH*,  
458 and thus this gene is required to establish infection. However, antifungal drugs are normally  
459 administered to treat patients who already have an established infection. Therefore, it is  
460 possible that the conditional essentiality of the gene could be overcome when the fungus is  
461 actively growing in the tissue, as the fungal metabolic requirements and the environmental  
462 conditions are different (49, 50). Consequently, in order to achieve a rigorous target validation,  
463 it is crucial to assess the efficiency of new target candidates in established infections. The first  
464 conditional promoter system used for *A. fumigatus in vivo* was the (p)niiA (48). This system  
465 represses genetic expression of the gene of interest in the presence of ammonium, which is  
466 contained in murine serum. Accordingly, in this seminal study several genes essential *in vitro*

467 were confirmed or refuted to be essential to initiate infection in a model of systemic (blood)  
468 infection. Currently, two more systems are in use to assess the relevance of fungal essential  
469 genes for pulmonary infection: TetON and (p)xylP. These systems can be used to either impede  
470 or permit fungal gene expression in murine lungs; but in both models this control can only be  
471 exerted from the beginning of infection, as sufficient levels of the inducing molecule  
472 (doxycycline or xylose) must be present to activate gene expression in the control condition.  
473 Consequently, these models have been used to investigate the relevance of genes required to  
474 grow *in vitro* to initiate pulmonary infection (17, 72, 77). However, those models cannot be used  
475 to determine the importance of the genes in established aspergillosis infections *in vivo*.  
476 Therefore, we aimed to optimise the use of the TetOFF system for this purpose, as it can be used  
477 to downregulate gene expression in growing mycelia. As a control for the model, we constructed  
478 a *cyp51A\_tetOFFΔcyp51B* (*51A\_OFF*) strain. We reasoned that the target of the azoles, first-line  
479 treatment drugs for *Aspergillus* diseases, should be the gold standard to compare any target  
480 against. This strain showed a similar behaviour as *H\_OFF* *in vitro*: as little as 0.05 µg/ml Dox  
481 prevented colony development on an agar plate (Fig. S8A) and addition of Dox to conidia or  
482 germlings blocked growth (Fig. S8B).

483 We first assayed the use of the TetOFF system in the *Galleria mellonella* alternative mini-host  
484 model of infection. Preliminary experiments revealed that the balance between reaching  
485 sufficient levels of Dox to exert an effect and maintaining toxic effects of overdose low was very  
486 delicate. We finally optimised a regimen consisting of 5 injections of 50 mg/kg Dox (Fig. S9A)  
487 that caused little mortality in the control group (25% in Dox control VS 12% in PBS treatment  
488 control  $P=0.22$ ) but still showed an effect of treatment (Fig. 6A). We then infected *Galleria* larvae  
489 with  $5 \times 10^2$  conidia of *51A\_OFF* or *H\_OFF* strains and applied the Dox regimen or PBS vehicle  
490 starting at the same time of infection (0 h) or 6 h after infection (Fig. S9A). For both strains,  
491 administration of Dox from the beginning of infection triggered a significant improvement in  
492 survival compared with the non-treated conditions (50% VS 17.2% for *51A\_OFF*,  $P=0.0036$ , and  
493 41.45% VS 6.67% for *H\_OFF*,  $P=0.022$ ) (Fig. 6A). The fact that administration of Dox at the time  
494 of infection did not improve survival to close to 100%, was not surprising, as it is important to  
495 note that Dox does not completely prevent gene expression (Fig. S1A), so a moderate effect on  
496 survival was expectable. Furthermore, rapid metabolization of the drug in the larvae hemocoel  
497 or microenvironment variations in its concentration may also account for a discrete effect of  
498 treatment. Despite this limitations of the model, we observed that administration of Dox 6 h  
499 after infection also triggered a significant improvement in survival for both strains (42.8% VS  
500 17.2% for *51A\_OFF*,  $P=0.0007$ , and 32.26% VS 6.67% for *H\_OFF*,  $P=0.0324$ ) (Fig. 6A). Therefore,

501 downregulation of methionine synthase genetic expression in established infections conferred  
502 a significant benefit in survival which was comparable to that observed with the target of the  
503 azoles.

504 The positive results obtained using the *Galleria* infection model prompted us to assay the  
505 TetOFF system in a leukopenic murine model of pulmonary aspergillosis. To ensure that Dox  
506 levels in mouse lungs reach and maintain sufficient concentrations to downregulate gene  
507 expression (according to our results *in vitro*) we performed a pilot Dox dosage experiment in  
508 immunosuppressed non-infected mice (Fig S8B). We extracted lungs of Dox treated mice at  
509 different time-points, homogenated them and measured Dox concentration using a bioassay  
510 based on inhibition of *Escherichia coli DH5 $\alpha$*  growth. We could detect promising levels of Dox in  
511 all mice (concentrations ranging from 2.2 to 0.94  $\mu\text{g}/\text{mL}$  –Fig. S9B–) which according to our  
512 results *in vitro* should be sufficient to downregulate gene expression from the TetOFF system.  
513 We therefore infected leukopenic mice with  $10^5$  spores of the *51A\\_OFF* or the *H\\_OFF* strains and  
514 administered PBS vehicle or our Dox regimen, starting 16 h after infection (Fig. S9B). The use of  
515 an uninfected, Dox treated control group uncovered that the intense Dox regimen used was  
516 harmful for the mice. These uninfected mice lost weight at a similar rate as the infected groups  
517 and looked ill from the third or fourth day of treatment. This is not surprising as Dox can impair  
518 mitochondrial function in mice (66) and has iron chelating properties (78). As a consequence,  
519 there was no beneficial effect of Dox treatment on survival (not shown). The fact that Dox  
520 treatment did also not show any benefit in survival for our control strain *51A\\_OFF*, which should  
521 mimic treatment with azoles (primary therapy for invasive aspergillosis), indicates that the  
522 TetOFF system is not ideal to mimic a drug treatment in established infections. Nevertheless, we  
523 further attempted to determine the efficiency of targeting MetH in established infections by  
524 measuring fungal burdens in lungs of treated and untreated mice. We observed that two and a  
525 half days of Dox treatment (when the mice have not developed visible toxic effects yet) did result  
526 in a significant reduction of fungal burdens 3 days after infection for both *51A\\_OFF* ( $P=0.0279$ )  
527 and *H\\_OFF* ( $P=0.0019$ ) (Fig. 6B). Therefore, we could observe a beneficial effect of interfering  
528 with methionine synthase genetic expression in an established pulmonary infection, which was  
529 comparable to that of interfering with the expression of *cyp51A*, the target of azoles. This  
530 constitutes a very rigorous validation of MetH as a promising antifungal target.

531 A recent study also aimed to use another TetOFF system to validate a drug target in  
532 established aspergillosis infections (79). These authors administered Dox exclusively through  
533 oral gavage, accounting for lower dosage of drug. Consequently, even if no toxic effect for the  
534 mice was observed, they also did not detect any beneficial effect on survival when the Dox



535 treatment was initiated after infection. Therefore, the TetOFF system is clearly not optimal and  
536 better models are needed. Yet, it is currently the only model with which the efficiency of new  
537 targets can be tested in aspergillosis established infections, and thus it is highly valuable that we  
538 have been able to optimise its use *in vivo*. Our *51A\_OFF* control strain has been key to calibrating  
539 the model, and allows us to be confident that the beneficial effects observed, even if subtle, are  
540 significant. Hence, we propose that hereinafter proper genetic validation of antifungal targets  
541 should include testing their relevance in established infections.

542

#### 543 *Structural-based virtual screening of MetH*

544 Having shown *in vivo* that MetH is a promising target, we decided to investigate its druggability  
545 by running a structural-based virtual screening. The sequence of *A. fumigatus* MetH (AfMetH)  
546 contains two predicted methionine synthase domains with a  $\beta$ -barrel fold conserved in other  
547 fungal and bacterial enzymes. The structure of the *C. albicans* orthologue (80) (CaMetH) showed  
548 that the active site is located between the two domains where the methyl tetrahydrofolate, the  
549 homocysteine substrate and the catalytic zinc ion bind in close proximity. The homology model  
550 for AfMetH (Fig. 7A) overlaps very well with that of the CaMetH thus providing a suitable  
551 molecular model for further analysis. In contrast, the structure of the human methionine  
552 synthase (hMS) shows a very different overall arrangement with the folate and homocysteine  
553 binding domains located in completely different regions (Fig. 7B). Comparison of the  
554 tetrahydrofolate binding sites between the fungal and the human structures also highlights  
555 significant structural differences that affect the conformation adopted by the ligand. In the  
556 CaMetH structure the 5-methyl-tetrahydrofolate (C2F) adopts a bent conformation (<20Å long)  
557 and it is in close proximity to the methionine product, whereas in the human structure the  
558 tetrahydrofolate (THF) ligand binds in an elongated conformation extending up to 30Å from end  
559 to end, (Fig. 7 C&D).

560 Virtual screening (VS) was carried on the AfMetH and the hMS structures with the Maybridge  
561 Ro3 fragment library to explore potential venues for drug development. The results showed four  
562 ligand binding clusters in the AfMetH structure, two of which (C1, C2) match the binding position  
563 of the 5-methyl-tetrahydrofolate and the methionine from the CaMetH crystal structure (Fig.  
564 7E). For the hMS, we found two main clusters, C1 that overlaps with the tetrahydrofolate binding  
565 site and C2 in a nearby pocket. Clearly the distribution of the clusters defines a very different  
566 landscape around the folate site between the human and the fungal enzymes. Furthermore, the  
567 proximity of the C1 and C2 clusters, matching the folate and Met/homocysteine binding sites in

568 the Ca/Af proteins means that it may be possible to combine ligands at both sites to generate  
569 double-site inhibitors with high specificity towards the fungal enzymes. Antifolates are a class of  
570 drugs that antagonise folate, blocking the action of folate dependent enzymes such as  
571 dihydrofolate reductase (DHFR), thymidylate synthase or methionine synthase. Methotrexate is  
572 an antifolate commonly used to treat cancer and autoimmune diseases. Interestingly,  
573 methotrexate has been shown to be a weak inhibitor of the *C. albicans* methionine synthase  
574 (32) and to have some antifungal activity against *C. albicans* (81) and *Aspergillus ssp* (82).  
575 Nevertheless, methotrexate is not a good antifungal drug, as its activity is high against human  
576 enzymes (IC<sub>50</sub> of 0.3 µM for DHFR (83)) and low against fungal methionine synthase (IC<sub>50</sub> of 4  
577 mM for *C. albicans* Meth (32)). Therefore, more potent and specific inhibitors of fungal  
578 methionine synthases are needed to fully exploit the value of this target for antifungal therapy,  
579 a task that seems possible and can be directed from our analyses.

580

581 In summary, we have shown that methionine synthase blockage triggers not only methionine  
582 auxotrophy, but also a metabolic imbalance that results in a drop in cellular energetics and  
583 growth arrest. In light of our results, we stress that conditional essentiality is important to  
584 understand the underlying mechanisms of metabolic processes and needs to be considered to  
585 achieve proper validation of novel antimicrobial targets. Accordingly, we proved that targeting  
586 methionine synthase in established infections has a beneficial effect similar to that observed for  
587 the target of azoles, the most effective drugs for the treatment of aspergillosis. Finally, we  
588 showed that fungal methionine synthases have distinct druggable pockets that can be exploited  
589 to design specific inhibitors. In conclusion, we have demonstrated that fungal methionine  
590 synthases are promising targets for the development of novel antifungals.

591

592

## 593 MATERIAL AND METHODS

### 594 *Strains, media and culture conditions*

595 The *Escherichia coli* strain DH5α (84) was used for cloning procedures. Plasmid-carrying *E. coli*  
596 strains were routinely grown at 37°C in LB liquid medium (Oxoid) under selective conditions (100  
597 µg·mL<sup>-1</sup> ampicillin or 50 µg·mL<sup>-1</sup> kanamycin); for growth on plates, 1.5% agar was added to  
598 solidify the medium. All plasmids used in the course of this study were generated using the  
599 Seamless Cloning (Invitrogen) technology as previously described (17, 85). *E. coli* strain BL21

600 (DE3) (86) was grown on Mueller Hinton agar (Sigma) in bioassays, to determine Dox  
601 concentrations within homogenized murine lungs.

602 The wild-type clinical isolate *Aspergillus fumigatus* strain ATCC 46645 served as reference  
603 recipient. *A. fumigatus* strain A1160 (*ku80Δ*) (87) was also used to confirm *metH* essentiality. *A.*  
604 *fumigatus* mutants were generated using a standard protoplasting protocol (88). *A. fumigatus*  
605 strains were generally cultured in minimal medium (MM) (89) (1% glucose, 5 mM ammonium  
606 tartrate, 7 mM KCl, 11 mM KH<sub>2</sub>PO<sub>4</sub>, 0.25 mM MgSO<sub>4</sub>, 1× Hutner's trace elements solution; pH  
607 5.5; 1.5% agar) at 37°C. For selection in the presence of resistance markers 50 µg·mL<sup>-1</sup> of  
608 hygromycin B or 100 µg·mL<sup>-1</sup> of pyrithiamine (InvivoGen) were applied. In sulfur-free medium  
609 (MM-S), MgCl<sub>2</sub> substituted for MgSO<sub>4</sub> and a modified mixture of trace elements lacking any  
610 sulfate salt was used. For all growth assays on solid media, the culture medium was inoculated  
611 with 10 µl of a freshly prepared *A. fumigatus* spore suspension (10<sup>5</sup> conidia·mL<sup>-1</sup> in water  
612 supplemented with 0.9% NaCl and 0.02% Tween 80) and incubated at 37°C for 3 days.

#### 613 *Extraction and manipulation of nucleic acids*

614 Standard protocols of recombinant DNA technology were carried out (90). Phusion<sup>®</sup> high-fidelity  
615 DNA polymerase (ThermoFisher Scientific) was generally used in polymerase chain reactions and  
616 essential cloning steps were verified by sequencing. Fungal genomic DNA was prepared  
617 following the protocol of Kolar *et al.* (91) and Southern analyses were carried out as described  
618 (92, 93), using the Amersham ECL Direct Labeling and Detection System<sup>®</sup> (GE Healthcare). Fungal  
619 RNA was isolated using TRIzol reagent (ThermoFisher Scientific) and Qiagen plant RNA extraction  
620 kit. Retrotranscription was performed using SuperScript III First-Strand Synthesis (ThermoFisher  
621 Scientific). RT-PCR on both gDNA and cDNA was performed using the SYBR<sup>®</sup> Green JumpStart  
622 (Sigma) in a 7500 Fast Real Time PCR cycler from Applied Biosystems.

#### 623 *Microscopy*

624 10<sup>3</sup> *A. fumigatus* resting or 8 h germinated conidia were inoculated in 200 µL of medium (+/-  
625 Dox) in 8 well imaging chambers (ibidi) and incubated at 37°C. Microscopy images were taken  
626 on a Nikon Eclipse TE2000-E, using a CFI Plan Apochromat Lambda 20X/0.75 objective and  
627 captured with a Hamamatsu Orca-ER CCD camera (Hamamatsu Photonics) and manipulated  
628 using NIS-Elements 4.0 (Nikon). For extensively grown mycelia a stereomicroscope Leica MZFL-  
629 III was used, with a Q-imaging Retinga 6000 camera, and manipulated using Metamorph v7760.  
630 Confocal imaging was performed using a Leica TCS SP8x inverted confocal microscope equipped  
631 with a 40X/0.85 objective. Nuclei were stained with DAPI (Life Technologies Ltd) as described

632 previously (94). GFP was excited at 458 nm with an Argon laser at 20% power. DAPI was excited  
633 at 405 nm with an LED diode at 20%.

#### 634 *Metabolome analyses*

635 *A. fumigatus* wild-type and *meth\_tetOFF* strains were incubated in MM for 16 h before the -Dox  
636 samples were taken (8 replicates of 11 mL each). Then, 5 µg/mL Dox and 5 mM methionine (to  
637 prevent metabolic adaptation due to met auxotrophy) were added as appropriate and the  
638 cultures incubated for 6 h, after which the +Dox samples were taken (8 × 11 mL). The samples  
639 were immediately quenched with 2× volumes of 60% methanol at -48°C. After centrifugation at  
640 4800 *g* for 10 min at -8°C, metabolites were extracted in 1 mL 80% methanol at -48°C by three  
641 cycles of N<sub>2</sub> liquid snap freezing, thawing and vortexing. Supernatant was cleared by  
642 centrifugation at -9 °C, 14,500 *g* for 5 min. Quality control (QC) samples were prepared by  
643 combining 100 µL from each sample. Samples were aliquoted (300 µL), followed by the addition  
644 of 100 µL of the internal standard solution (0.2 mg/mL succinic-*d*<sub>4</sub> acid, and 0.2 mg/mL glycine-  
645 *d*<sub>5</sub>) and vortex mix for 15 s. All samples were lyophilised by speed vacuum concentration at room  
646 temperature overnight (HETO VR MAXI vacuum centrifuge attached to a Thermo Svart RVT 4104  
647 refrigerated vapour trap; Thermo Life Sciences, Basingstoke, U.K.). A two-step derivatization  
648 protocol of methoxyamination followed by trimethylsilylation was employed (95).

649 GC-MS analysis was conducted on a 7890B GC coupled to a 5975 series MSD quadrupole  
650 mass spectrometer and equipped with a 7693 autosampler (Agilent, Technologies, UK). The  
651 sample (1 µL) was injected onto a VF5-MS column (30 m x 0.25 mm x 0.25 µm; Agilent  
652 Technologies) with an inlet temperature of 280 °C and a split ratio of 20:1. Helium was used as  
653 the carrier gas with a flow rate of 1 mL/min. The chromatography was programmed to begin at  
654 70 °C with a hold time of 4 min, followed by an increase to 300 °C at a rate of 14 °C/min and a  
655 final hold time of 4 min before returning to 70 °C. The total run time for the analysis was 24.43  
656 min. The MS was equipped with an electron impact ion source using 70 eV ionisation and a fixed  
657 emission of 35 µA. The mass spectrum was collected for the range 50-550 *m/z* with a scan speed  
658 of 3,125 (*N*=1). Samples were analysed in a randomised order with the injection of a pooled  
659 biological quality control sample after every 6th sample injection.

660 For data analysis, the GC-MS raw files were converted to mzXML and subsequently imported  
661 to R. The R package “*erah*” was employed to de-convolve the GC-MS files. Chromatographic  
662 peaks and mass spectra were cross-referenced with the Golm library for putative identification  
663 purposes, and followed the metabolomics standards initiative (MSI) guidelines for metabolite  
664 identification (96). The peak intensities were normalised according to the IS (succinic-*d*<sub>4</sub> acid)

665 before being log<sub>10</sub>-scaled for further statistical analysis. All pre-processed data were investigated  
666 by employing principal component analysis (PCA) (97).

667 The raw data of this metabolome analysis has been deposited in the MetaboLights database  
668 (98), under the reference MTBLS1636 ([www.ebi.ac.uk/metabolights/MTBLS1636](http://www.ebi.ac.uk/metabolights/MTBLS1636))

#### 669 *ATP Quantitation*

670 *A. fumigatus* was grown as in the metabolome analysis. However, where the effect of SAM was  
671 investigated spores were inoculated into MM-N + 1mg/mL aac and 0.5mM SAM was also added  
672 at the time of Dox addition. ATP levels were determined using the BacTiter-Glo™ Assay  
673 (Promega) following the manufacturer's instructions and a TriStar LB 941 Microplate Reader  
674 (Berthold).

#### 675 *Isolation and detection of SAM*

676 *A. fumigatus* was grown exactly in the same conditions as described for the metabolome  
677 analysis. Harvested mycelia were snap-frozen in liquid N<sub>2</sub> and stored at -70 °C before SAM  
678 isolation. SAM extraction was carried out according to Owens *et al* (99). Briefly, frozen mycelia  
679 were ground in liquid N<sub>2</sub> and 0.1 M HCl (250 µL) was added to ground mycelia (100 mg). Samples  
680 were stored on ice for 1 h, with sample vortexing at regular intervals. Samples were centrifuged  
681 at 13,000 *g* for 10 min (4 °C) to remove cell debris and supernatants were collected.  
682 Concentration of protein in supernatants was determined using a Biorad Bradford protein assay  
683 relative to a bovine serum albumin (BSA) standard curve. Clarified supernatants were adjusted  
684 to 15 % (w/v) trichloroacetic acid to remove protein. After 20 min incubation on ice,  
685 centrifugation was repeated and clarified supernatants were diluted with 0.1 % (v/v) formic acid.  
686 Samples were injected onto a Hypersil Gold aQ C18 column with polar endcapping on a Dionex  
687 UltiMate 3000 nanoRSLC with a Thermo Q-Exactive mass spectrometer. Samples were loaded in  
688 100 % Solvent A (0.1 % (v/v) formic acid in water) followed by a gradient to 20 % B (Solvent B:  
689 0.1 % (v/v) formic acid in acetonitrile) over 4 min. Resolution set to 70000 for MS, with MS/MS  
690 scans collected using a Top3 method. SAM standard (Sigma) was used to determine retention  
691 time and to confirm MS/MS fragmentation pattern for identification. Extracted ion  
692 chromatograms were generated at m/z 399-400 and the peak area of SAM was measured.  
693 Measurements were taken from three biological and two technical replicates per sample,  
694 normalized to the protein concentration in the extracts from each replicate. SAM levels are  
695 expressed as a percentage relative to the parental strain in the absence of Dox.

#### 696 *Nuclei isolation and Western Blot*

697 Protoplasts were generated as in *A. fumigatus* transformations and nuclei isolated were isolated  
698 by sucrose gradient fractionation as previously described by Sperling and Grunstein (100).  
699 Nuclear localisation of GFP-tagged target proteins was confirmed by Western-blot. Aliquots of  
700 nuclei were boiled for 5 minutes in loading buffer (0.2 M Tris-HCl, 0.4 M DTT, 8% SDS, trace  
701 bromophenol blue) and separated on a 12% (w/v) SDS-PAGE gel. The proteins were transferred  
702 to a Polyvinylidene difluoride (PVDF) membrane using the Trans-Blot® Turbo™ Transfer System  
703 (Bio-Rad). Detection of GFP was carried out with a rabbit polyclonal anti-GFP antiserum (Bio-  
704 Rad) and anti-rabbit IgG HRP-linked antibody (Cell Signalling Technology). SuperSignal West Pico  
705 PLUS Chemiluminescent Substrate (Thermo Scientific) and the ChemiDoc XRS+ Imaging System  
706 (Biorad) were used to visualise immunoreactive bands. Ponceau S staining was performed to  
707 normalize the Western-blot signal to the protein loading.

#### 708 *Mitochondria imaging*

709 Approximately 200 *A. fumigatus* spores were seeded onto Ibidi 8-well slides in minimal medium  
710 containing 0, 1, 10, 100 and 1000 µg/ml Dox and incubated at 37 °C for 16 hours. The culture  
711 medium was then replaced with minimal medium containing the same Dox concentrations plus  
712 10 µM Rhodamine 123 dye and further incubated for 1-2 hours at 37 °C prior to live-cell confocal  
713 imaging. High-resolution confocal fluorescence imaging was performed at 37 °C on a Leica SP8x  
714 using a 63x/1.3NA oil immersion lens, whereby Rhodamine 123 fluorescence was excited with a  
715 white light laser (5%) tuned to 508 nm and the emission collected on HyD detectors set to 513-  
716 600 nm. Representative single plane images of each condition were background-subtracted  
717 (rolling ball 20 pixel radius) in Fiji (101) and montaged using FigureJ (102).

#### 718 *Biomass measurement*

719 Conidia were inoculated into MM-S, supplemented with either methionine or sulfate, and  
720 incubated at 37°C 180 rpm for 12, 16 or 24 h. After this initial incubation, 3 mL samples were  
721 taken in triplicate from the cultures, filtered through tared Miracloth, dried at 60°C for 16 h and  
722 their biomass measured. In treated conditions Dox was added to a final concentration of 1  
723 µg/mL and the culture allowed to grow for a further 24 h at 37°C 180 rpm. 5 mL samples were  
724 taken in triplicate and their biomass measured as above.

#### 725 *Galleria mellonella* infections

726 Sixth-stage instar larval *G. mellonella* moths (15 to 25 mm in length) were ordered from the Live  
727 Foods Company (Sheffield, United Kingdom). Infections were performed according to Kavanagh  
728 and Fallon (103). Randomly selected groups of 15 larvae were injected in the last left proleg with

729 10  $\mu$ L of a suspension of  $5 \times 10^4$  conidia/mL in PBS, using Braun Omnican 50-U 100 0.5- mL insulin  
730 syringes with integrated needles. Dox was administered according to the treatment shown in  
731 Fig. S9A, alternating injections in the last right and left prolegs. In each experiment an untouched  
732 and a saline injected control were included, to verify that mortality was not due to the health  
733 status of the larvae or the injection method. Three independent experiments were carried out.  
734 The presented survival curves display the pooled data, which was analysed with the Log-Rank  
735 test.

#### 736 *Ethics Statement*

737 All mouse experiments were performed under United Kingdom Home Office project license  
738 PDF8402B7 and approved by the University of Manchester Ethics Committee and by the  
739 Biological Services Facility at the Faculty of Biology, Medicine and Health, University of  
740 Manchester.

#### 741 *Leukopenic murine model of invasive pulmonary aspergillosis and calculation of fungal burden.*

742 Outbred CD1 male mice (22– 26 g) were purchased from Charles Rivers and left to rest for at  
743 least 1 week before the experiment. Mice were allowed access *ad libitum* to water and food  
744 throughout the experiment. Mice were immunosuppressed with 150 mg/kg of  
745 cyclophosphamide on days -3 and -1 and with 250 mg/kg cortisone acetate on day -1. On day 0  
746 mice were anesthetized with isoflurane and intranasally infected with a dose of  $10^5$  conidia (40  
747  $\mu$ L of a freshly harvested spore solution of  $2.5 \times 10^6$  conidia/mL). Dox was administered  
748 according to the treatment shown in Fig. S9B. Dox containing food was purchased from Envigo  
749 (Safe-diet U8200 Version 0115 A03 0.625 g/kg Doxycycline Hyclate pellets). At the selected time-  
750 point (72 h after infection for fungal burden) mice were sacrificed by a lethal injection of  
751 pentobarbital, the lungs harvested and immediately frozen.

752 Frozen lungs were lyophilised for 48 h in a CoolSafe ScanVac freeze drier connected to a  
753 VacuuBrand pump and subsequently ground in the presence of liquid nitrogen. DNA was  
754 isolated from the powder using the DNeasy Blood & Tissue Kit (Qiagen). DNA concentration and  
755 quality were measured using a NanoDrop 2000 (ThermoFisher Scientific). To detect the fungal  
756 burden, 500 ng of DNA extracted from each infected lung were subjected to qPCR. Primers used  
757 to amplify the *A. fumigatus*  $\beta$ -tubulin gene (AFUA\_7G00250) were forward, 5'-  
758 ACTTCCGCAATGGACGTTAC-3', and reverse, 5'- GGATGTTGTTGGGAATCCAC-3'. Those designed  
759 to amplify the murine actin locus (NM\_007393) were forward, 5'-CGAGCACAGCTTCTTTGCAG-3'  
760 and reverse, 5'-CCCATGGTGTCCGTTCTGA-3'. Standard curves were calculated using different  
761 concentrations of fungal and murine gDNA pure template. Negative controls containing no

762 template DNA were subjected to the same procedure to exclude or detect any possible  
763 contamination. Three technical replicates were prepared for each lung sample. qPCRs were  
764 performed using the 7500 Fast Real-Time PCR system (Thermo Fisher Scientific) with the  
765 following thermal cycling parameters: 94 °C for 2 min and 40 cycles of 94°C for 15 s and 59°C for  
766 1 min. The fungal burden was calculated by normalising the number of fungal genome  
767 equivalents (i.e. number of copies of the tubulin gene) to the murine genome equivalents in the  
768 sample (i.e number of copies of the actin gene) (104). Two independent experiments were  
769 carried out ( $n=9$ , 5 mice in the first and 4 mice in the second experiment). Burdens for each  
770 strain were compared using a Mann Whitney test.

#### 771 *Molecular homology models and virtual screening*

772 The full-length sequence for AFUA\_4G07360, the cobalamin-independent methionine synthase  
773 MetH from *A. fumigatus* (AfMetH) was obtained from FungiDB (<https://fungidb.org/fungidb>)  
774 (105). This sequence together with the structure of the *C. albicans* orthologue (CaMetH) (PDB  
775 ID: 4L65, DOI: 10.1016/j.jmb.2014.02.006) were used to create the molecular homology model  
776 in Modeller (version 9.23) (106) with the basic option mode. The AfMetH model was then used  
777 for virtual screening with the semi-automated pipeline VSpice (107). For comparison we also  
778 performed virtual screening with the structure of the human methionine synthase (hMS)  
779 containing the folate and homocysteine binding domains (PDB ID: 4CCZ). Docking was done  
780 using the Maybridge Ro3 1000 fragment library with AutoDock Vina (108). Results were  
781 inspected graphically using PyMol (v1.8.0.3 Enhanced for Mac OS X (Schrödinger)). All images  
782 were produced with PyMol.

783

784

#### 785 **ACKNOWLEDGEMENTS**

786 We acknowledge the use of the Phenotyping Center at Manchester (PCAM) for the use of their  
787 microscopes and advanced image analysis workstations. We are grateful to Prof Sven  
788 Krappmann for critical reading of the manuscript and his constant support and guidance. We  
789 also are indebted to Prof Robert Cramer for his insightful feedback on the manuscript and  
790 personal support. We would like to thank all members of MFIG for constant help and  
791 encouragement.

792 JA was supported by a MRC Career Development Award (MR/N008707/1). JS was supported by  
793 a BSAC scholarship (bsac-2016-0049). BPT was supported by a MRC Doctoral Training  
794 Partnership PhD studentship. Q-Exact mass spectrometer and nanoLC instrumentation were



795 funded by a competitive infrastructure award from Science Foundation Ireland (SFI)  
796 (12/RI/2346(3)).

#### 797 **AUTHOR CONTRIBUTION**

798 JS performed the majority of experiments, analysed and interpreted most of the data and  
799 participated in the design of the project. MS helped with the acquisition and analysis of most of  
800 the experiments. BT run the structural-based virtual screening. RAO measured SAM levels in  
801 mycelia. HMA performed the metabolomic experiment, analysed and with RG interpreted the  
802 data. RFG assisted with the mouse models of infection. DT performed the microscopy of *A.*  
803 *fumigatus* mitochondria and supported the other microscopy experiments. RT helped with the  
804 execution of qPCRs. KH helped to set up the GC-MS instrument. SD designed the MS/MS analysis  
805 of SAM. RG designed the metabolome analysis and interpreted the data. LT designed the virtual  
806 screening analysis and interpreted the data. EB participated in the design and conception of the  
807 project. JA conceived and designed the project and analysed most of the data.

#### 808 **COMPETING INTERESTS**

809 The authors declare no competing interests.

#### 810 **DATA AVAILABILITY**

811 The raw data that support the findings of this study are available upon reasonable request to  
812 the authors. The raw data of metabolome analysis has been deposited in the MetaboLights  
813 database <sup>85</sup>, under the reference MTBLS1636 ([www.ebi.ac.uk/metabolights/MTBLS1636](http://www.ebi.ac.uk/metabolights/MTBLS1636)).

814

815

816

817

818

819

820

821

822

823

824     **REFERENCES**

- 825     1.     Fisher MC, Hawkins NJ, Sanglard D, Gurr SJ. 2018. Worldwide emergence of resistance  
826           to antifungal drugs challenges human health and food security. *Science* 360:739-742.
- 827     2.     Bongomin F, Gago S, Oladele RO, Denning DW. 2017. Global and Multi-National  
828           Prevalence of Fungal Diseases-Estimate Precision. *J Fungi (Basel)* 3.
- 829     3.     Bitar D, Lortholary O, Le Strat Y, Nicolau J, Coignard B, Tattevin P, Che D, Dromer F.  
830           2014. Population-based analysis of invasive fungal infections, France, 2001-2010.  
831           *Emerg Infect Dis* 20:1149-55.
- 832     4.     Brown GD, Denning DW, Gow NA, Levitz SM, Netea MG, White TC. 2012. Hidden  
833           killers: human fungal infections. *Sci Transl Med* 4:165rv13.
- 834     5.     Nyazika TK, Hagen F, Machiridza T, Kutepa M, Masanganise F, Hendrickx M, Boekhout  
835           T, Magombei-Majinjiwa T, Siziba N, Chin'ombe N, Mateveke K, Meis JF, Robertson VJ.  
836           2016. *Cryptococcus neoformans* population diversity and clinical outcomes of HIV-  
837           associated cryptococcal meningitis patients in Zimbabwe. *J Med Microbiol* 65:1281-  
838           1288.
- 839     6.     Patterson TF, Thompson GR, 3rd, Denning DW, Fishman JA, Hadley S, Herbrecht R,  
840           Kontoyiannis DP, Marr KA, Morrison VA, Nguyen MH, Segal BH, Steinbach WJ, Stevens  
841           DA, Walsh TJ, Wingard JR, Young JA, Bennett JE. 2016. Executive Summary: Practice  
842           Guidelines for the Diagnosis and Management of Aspergillosis: 2016 Update by the  
843           Infectious Diseases Society of America. *Clin Infect Dis* 63:433-42.
- 844     7.     Pound MW, Townsend ML, Dimondi V, Wilson D, Drew RH. 2011. Overview of  
845           treatment options for invasive fungal infections. *Med Mycol* 49:561-80.
- 846     8.     Ghannoum MA, Rice LB. 1999. Antifungal agents: mode of action, mechanisms of  
847           resistance, and correlation of these mechanisms with bacterial resistance. *Clin*  
848           *Microbiol Rev* 12:501-17.
- 849     9.     Verweij PE, Chowdhary A, Melchers WJ, Meis JF. 2016. Azole Resistance in *Aspergillus*  
850           *fumigatus*: Can We Retain the Clinical Use of Mold-Active Antifungal Azoles? *Clin Infect*  
851           *Dis* 62:362-8.
- 852     10.    Amich J, Krappmann S. 2012. Deciphering metabolic traits of the fungal pathogen  
853           *Aspergillus fumigatus*: redundancy vs. essentiality. *Frontiers in Microbiology Fungi and*  
854           *Their Interactions*.
- 855     11.    Kaltdorf M, Srivastava M, Gupta SK, Liang C, Binder J, Dietl AM, Meir Z, Haas H,  
856           Oshero N, Krappmann S, Dandekar T. 2016. Systematic Identification of Anti-Fungal  
857           Drug Targets by a Metabolic Network Approach. *Front Mol Biosci* 3:22.
- 858     12.    Oliver JD, Sibley GEM, Beckmann N, Dobb KS, Slater MJ, McEntee L, du Pre S,  
859           Livermore J, Bromley MJ, Wiederhold NP, Hope WW, Kennedy AJ, Law D, Birch M.  
860           2016. F901318 represents a novel class of antifungal drug that inhibits dihydroorotate  
861           dehydrogenase. *Proc Natl Acad Sci U S A* 113:12809-12814.
- 862     13.    Evans JC, Huddler DP, Hilgers MT, Romanchuk G, Matthews RG, Ludwig ML. 2004.  
863           Structures of the N-terminal modules imply large domain motions during catalysis by  
864           methionine synthase. *Proceedings of the National Academy of Sciences of the United*  
865           *States of America* 101:3729-3736.
- 866     14.    Peariso K, Zhou ZHS, Smith AE, Matthews RG, Penner-Hahn JE. 2001. Characterization  
867           of the zinc sites in cobalamin-independent and cobalamin-dependent methionine  
868           synthase using zinc and selenium X-ray absorption spectroscopy. *Biochemistry* 40:987-  
869           993.
- 870     15.    Gonzalez JC, Banerjee RV, Huang S, Sumner JS, Matthews RG. 1992. Comparison of  
871           cobalamin-independent and cobalamin-dependent methionine synthases from  
872           *Escherichia coli*: two solutions to the same chemical problem. *Biochemistry* 31:6045-  
873           56.

- 874 16. Matthews RG, Smith AE, Zhou ZHS, Taurog RE, Bandarian V, Evans JC, Ludwig M. 2003.  
875 Cobalamin-dependent and cobalamin-independent methionine synthases: Are there  
876 two solutions to the same chemical problem? *Helvetica Chimica Acta* 86:3939-3954.
- 877 17. Amich J, Dumig M, O'Keefe G, Binder J, Doyle S, Beilhack A, Krappmann S. 2016.  
878 Exploration of Sulfur Assimilation of *Aspergillus fumigatus* Reveals Biosynthesis of  
879 Sulfur-Containing Amino Acids as a Virulence Determinant. *Infect Immun* 84:917-29.
- 880 18. Segal ES, Gritsenko V, Levitan A, Yadav B, Dror N, Steenwyk JL, Silberberg Y, Mielich K,  
881 Rokas A, Gow NAR, Kunze R, Sharan R, Berman J. 2018. Gene Essentiality Analyzed by  
882 In Vivo Transposon Mutagenesis and Machine Learning in a Stable Haploid Isolate of  
883 *Candida albicans*. *MBio* 9.
- 884 19. Suliman HS, Appling DR, Robertus JD. 2007. The gene for cobalamin-independent  
885 methionine synthase is essential in *Candida albicans*: a potential antifungal target.  
886 *Arch Biochem Biophys* 467:218-26.
- 887 20. Pascon RC, Ganous TM, Kingsbury JM, Cox GM, McCusker JH. 2004. *Cryptococcus*  
888 *neoformans* methionine synthase: expression analysis and requirement for virulence.  
889 *Microbiology* 150:3013-23.
- 890 21. Li W, Cowley A, Uludag M, Gur T, McWilliam H, Squizzato S, Park YM, Buso N, Lopez R.  
891 2015. The EMBL-EBI bioinformatics web and programmatic tools framework. *Nucleic*  
892 *Acids Res* 43:W580-4.
- 893 22. McWilliam H, Li W, Uludag M, Squizzato S, Park YM, Buso N, Cowley AP, Lopez R. 2013.  
894 Analysis Tool Web Services from the EMBL-EBI. *Nucleic Acids Res* 41:W597-600.
- 895 23. Miwa GT. 2010. The Drug Discovery Process p1-14. *In* Lu C, Li AP (ed), *Enzyme*  
896 *Inhibition in Drug Discovery and Development: The Good and the Bad*  
897 doi:10.1002/9780470538951.
- 898 24. Cook D, Brown D, Alexander R, March R, Morgan P, Satterthwaite G, Pangalos MN.  
899 2014. Lessons learned from the fate of AstraZeneca's drug pipeline: a five-dimensional  
900 framework. *Nature Reviews Drug Discovery* 13:419-431.
- 901 25. Wanka F, Cairns T, Boecker S, Berens C, Happel A, Zheng X, Sun J, Krappmann S, Meyer  
902 V. 2016. Tet-on, or Tet-off, that is the question: Advanced conditional gene expression  
903 in *Aspergillus*. *Fungal Genet Biol* 89:72-83.
- 904 26. Scott J, Sueiro-Olivares M, Ahmed W, Heddergott C, Zhao C, Thomas R, Bromley M,  
905 Latge JP, Krappmann S, Fowler S, Bignell E, Amich J. 2019. *Pseudomonas aeruginosa*-  
906 Derived Volatile Sulfur Compounds Promote Distal *Aspergillus fumigatus* Growth and a  
907 Synergistic Pathogen-Pathogen Interaction That Increases Pathogenicity in Co-  
908 infection. *Front Microbiol* 10:2311.
- 909 27. Lucock M. 2000. Folic acid: nutritional biochemistry, molecular biology, and role in  
910 disease processes. *Mol Genet Metab* 71:121-38.
- 911 28. Tzin V, Galili G. 2010. The Biosynthetic Pathways for Shikimate and Aromatic Amino  
912 Acids in *Arabidopsis thaliana*. *Arabidopsis Book* 8:e0132.
- 913 29. Deakova Z, Durackova Z, Armstrong DW, Lehotay J. 2015. Two-dimensional high  
914 performance liquid chromatography for determination of homocysteine, methionine  
915 and cysteine enantiomers in human serum. *J Chromatogr A* 1408:118-24.
- 916 30. Elshorbagy AK, Jernerren F, Samocha-Bonet D, Refsum H, Heilbronn LK. 2016. Serum S-  
917 adenosylmethionine, but not methionine, increases in response to overfeeding in  
918 humans. *Nutr Diabetes* 6:e192.
- 919 31. Jochim A, Shi T, Belikova D, Schwarz S, Peschel A, Heilbronner S. 2019. Methionine  
920 Limitation Impairs Pathogen Expansion and Biofilm Formation Capacity. *Appl Environ*  
921 *Microbiol* 85.
- 922 32. Ubhi D, Kago G, Monzingo AF, Robertus JD. 2014. Structural analysis of a fungal  
923 methionine synthase with substrates and inhibitors. *J Mol Biol* 426:1839-47.

- 924 33. Sahu U, Rajendra VKH, Kapnoor SS, Bhagavat R, Chandra N, Rangarajan PN. 2017.  
925 Methionine synthase is localized to the nucleus in *Pichia pastoris* and *Candida albicans*  
926 and to the cytoplasm in *Saccharomyces cerevisiae*. J Biol Chem 292:14730-14746.
- 927 34. Fujita Y, Ukena E, Iefuji H, Giga-Hama Y, Takegawa K. 2006. Homocysteine  
928 accumulation causes a defect in purine biosynthesis: further characterization of  
929 *Schizosaccharomyces pombe* methionine auxotrophs. Microbiology 152:397-404.
- 930 35. Gems D, Johnstone IL, Clutterbuck AJ. 1991. An autonomously replicating plasmid  
931 transforms *Aspergillus nidulans* at high frequency. Gene 98:61-7.
- 932 36. Aleksenko AY, Clutterbuck AJ. 1995. Recombinational stability of replicating plasmids  
933 in *Aspergillus nidulans* during transformation, vegetative growth and sexual  
934 reproduction. Curr Genet 28:87-93.
- 935 37. Paul S, Klutts JS, Moye-Rowley WS. 2012. Analysis of promoter function in *Aspergillus*  
936 *fumigatus*. Eukaryot Cell 11:1167-77.
- 937 38. Christopher SA, Melnyk S, James SJ, Kruger WD. 2002. S-adenosylhomocysteine, but  
938 not homocysteine, is toxic to yeast lacking cystathionine beta-synthase. Mol Genet  
939 Metab 75:335-43.
- 940 39. Perna AF, Ingrosso D, Lombardi C, Acanfora F, Satta E, Cesare CM, Violetti E, Romano  
941 MM, De Santo NG. 2003. Possible mechanisms of homocysteine toxicity. Kidney Int  
942 Suppl doi:10.1046/j.1523-1755.63.s84.33.x:S137-40.
- 943 40. Bretes E, Zimny J. 2013. Homocysteine thiolactone affects protein ubiquitination in  
944 yeast. Acta Biochim Pol 60:485-8.
- 945 41. Jakubowski H. 2006. Pathophysiological consequences of homocysteine excess. J Nutr  
946 136:1741S-1749S.
- 947 42. Lopez-Ibanez J, Pazos F, Chagoyen M. 2016. MBROLE 2.0-functional enrichment of  
948 chemical compounds. Nucleic Acids Research 44:W201-W204.
- 949 43. Chong J, Soufan O, Li C, Caraus I, Li SZ, Bourque G, Wishart DS, Xia JG. 2018.  
950 MetaboAnalyst 4.0: towards more transparent and integrative metabolomics analysis.  
951 Nucleic Acids Research 46:W486-W494.
- 952 44. Xia JG, Psychogios N, Young N, Wishart DS. 2009. MetaboAnalyst: a web server for  
953 metabolomic data analysis and interpretation. Nucleic Acids Research 37:W652-W660.
- 954 45. Fendt SM, Sauer U. 2010. Transcriptional regulation of respiration in yeast  
955 metabolizing differently repressive carbon substrates. BMC Syst Biol 4:12.
- 956 46. Akita O, Nishimori C, Shimamoto T, Fujii T, Iefuji H. 2000. Transport of pyruvate in  
957 *Saccharomyces cerevisiae* and cloning of the gene encoded pyruvate permease. Biosci  
958 Biotechnol Biochem 64:980-4.
- 959 47. Forte GM, Davie E, Lie S, Franz-Wachtel M, Ovens AJ, Wang T, Oakhill JS, Macek B,  
960 Hagan IM, Petersen J. 2019. Import of extracellular ATP in yeast and man modulates  
961 AMPK and TORC1 signalling. J Cell Sci 132.
- 962 48. Hu W, Sillaots S, Lemieux S, Davison J, Kauffman S, Breton A, Linteau A, Xin C, Bowman  
963 J, Becker J, Jiang B, Roemer T. 2007. Essential gene identification and drug target  
964 prioritization in *Aspergillus fumigatus*. PLoS Pathog 3:e24.
- 965 49. Beattie SR, Mark KMK, Thammahong A, Ries LNA, Dhingra S, Caffrey-Carr AK, Cheng C,  
966 Black CC, Bowyer P, Bromley MJ, Obar JJ, Goldman GH, Cramer RA. 2017. Filamentous  
967 fungal carbon catabolite repression supports metabolic plasticity and stress responses  
968 essential for disease progression. PLoS Pathog 13:e1006340.
- 969 50. Cramer RA. 2016. *In vivo* veritas: *Aspergillus fumigatus* proliferation and pathogenesis-  
970 conditionally speaking. Virulence 7:7-10.
- 971 51. Kowalski CH, Kerkaert JD, Liu KW, Bond MC, Hartmann R, Nadell CD, Stajich JE, Cramer  
972 RA. 2019. Fungal biofilm morphology impacts hypoxia fitness and disease progression.  
973 Nat Microbiol 4:2430-2441.
- 974 52. Gorman MW, Feigl EO, Buffington CW. 2007. Human plasma ATP concentration. Clin  
975 Chem 53:318-25.

- 976 53. Ito S, Furuya K, Sokabe M, Hasegawa Y. 2016. Cellular ATP release in the lung and  
977 airway. *Aims Biophysics* 3:571-584.
- 978 54. Mortaz E, Braber S, Nazary M, Givi ME, Nijkamp FP, Folkerts G. 2009. ATP in the  
979 pathogenesis of lung emphysema. *Eur J Pharmacol* 619:92-6.
- 980 55. Riteau N, Gasse P, Fauconnier L, Gombault A, Couegnat M, Fick L, Kanellopoulos J,  
981 Quesniaux VFJ, Marchand-Adam S, Crestani B, Ryffel B, Couillin I. 2010. Extracellular  
982 ATP Is a Danger Signal Activating P2X(7) Receptor in Lung Inflammation and Fibrosis.  
983 *American Journal of Respiratory and Critical Care Medicine* 182:774-783.
- 984 56. Walvekar AS, Srinivasan R, Gupta R, Laxman S. 2018. Methionine coordinates a  
985 hierarchically organized anabolic program enabling proliferation. *Mol Biol Cell*  
986 29:3183-3200.
- 987 57. De Virgilio C, Loewith R. 2006. The TOR signalling network from yeast to man. *Int J*  
988 *Biochem Cell Biol* 38:1476-81.
- 989 58. Loewith R, Hall MN. 2011. Target of rapamycin (TOR) in nutrient signaling and growth  
990 control. *Genetics* 189:1177-201.
- 991 59. Saxton RA, Sabatini DM. 2017. mTOR Signaling in Growth, Metabolism, and Disease.  
992 *Cell* 168:960-976.
- 993 60. Thiebold AL, Lorenz NI, Foltyn M, Engel AL, Dive I, Urban H, Heller S, Bruns I, Hofmann  
994 U, Droese S, Harter PN, Mittelbronn M, Steinbach JP, Ronellenfitsch MW. 2017.  
995 Mammalian target of rapamycin complex 1 activation sensitizes human glioma cells to  
996 hypoxia-induced cell death. *Brain* 140:2623-2638.
- 997 61. Tsouko E, Khan AS, White MA, Han JJ, Shi Y, Merchant FA, Sharpe MA, Xin L, Frigo DE.  
998 2014. Regulation of the pentose phosphate pathway by an androgen receptor-mTOR-  
999 mediated mechanism and its role in prostate cancer cell growth. *Oncogenesis* 3:e103.
- 1000 62. Baldin C, Valiante V, Kruger T, Schafferer L, Haas H, Kniemeyer O, Brakhage AA. 2015.  
1001 Comparative proteomics of a tor inducible *Aspergillus fumigatus* mutant reveals  
1002 involvement of the Tor kinase in iron regulation. *Proteomics* 15:2230-43.
- 1003 63. Caza M, Kronstad JW. 2019. The cAMP/Protein Kinase a Pathway Regulates Virulence  
1004 and Adaptation to Host Conditions in *Cryptococcus neoformans*. *Front Cell Infect*  
1005 *Microbiol* 9:212.
- 1006 64. Grosse C, Heinekamp T, Kniemeyer O, Gehrke A, Brakhage AA. 2008. Protein kinase A  
1007 regulates growth, sporulation, and pigment formation in *Aspergillus fumigatus*. *Appl*  
1008 *Environ Microbiol* 74:4923-33.
- 1009 65. Gerke J, Bayram O, Braus GH. 2012. Fungal S-adenosylmethionine synthetase and the  
1010 control of development and secondary metabolism in *Aspergillus nidulans*. *Fungal*  
1011 *Genet Biol* 49:443-54.
- 1012 66. Moullan N, Mouchiroud L, Wang X, Ryu D, Williams EG, Mottis A, Jovaisaite V,  
1013 Frochaux MV, Quiros PM, Deplancke B, Houtkooper RH, Auwerx J. 2015. Tetracyclines  
1014 Disturb Mitochondrial Function across Eukaryotic Models: A Call for Caution in  
1015 Biomedical Research. *Cell Rep* 10:1681-1691.
- 1016 67. Samant R, Ahler E, Sullivan WJ, Cass A, Braas D, York AG, Bensinger SJ, Graeber TG,  
1017 Christofk HR. 2013. Doxycycline Alters Metabolism and Proliferation of Human Cell  
1018 Lines. *PLoS ONE* 8.
- 1019 68. Sasse A, Hamer SN, Amich J, Binder J, Krappmann S. 2015. Mutant characterization and  
1020 in vivo conditional repression identify aromatic amino acid biosynthesis to be essential  
1021 for *Aspergillus fumigatus* virulence. *Virulence* 7:56-62.
- 1022 69. Binder J, Shadkhan Y, Oshero N, Krappmann S. 2020. The Essential Thioredoxin  
1023 Reductase of the Human Pathogenic Mold *Aspergillus fumigatus* Is a Promising  
1024 Antifungal Target. *Frontiers in Microbiology* 11.
- 1025 70. Miceli MH, Bernardo SM, Lee SA. 2009. In vitro analyses of the combination of high-  
1026 dose doxycycline and antifungal agents against *Candida albicans* biofilms. *International*  
1027 *Journal of Antimicrobial Agents* 34:326-332.

- 1028 71. Chen T, Wagner AS, Tams RN, Eyer JE, Kauffman SJ, Gann ER, Fernandez EJ, Reynolds  
1029 TB, Heitman J. 2019. Lrg1 Regulates  $\beta$  (1,3)-Glucan Masking in *Candida albicans*  
1030 through the Cek1 MAP Kinase Pathway. *mBio* 10.
- 1031 72. Stewart JIP, Fava VM, Kerkaert JD, Subramanian AS, Gravelat FN, Lehoux M, Howell PL,  
1032 Cramer RA, Sheppard DC. 2020. Reducing *Aspergillus fumigatus* Virulence through  
1033 Targeted Dysregulation of the Conidiation Pathway. *mBio* 11.
- 1034 73. Fiori A, Van Dijck P. 2012. Potent Synergistic Effect of Doxycycline with Fluconazole  
1035 against *Candida albicans* Is Mediated by Interference with Iron Homeostasis.  
1036 *Antimicrobial Agents and Chemotherapy* 56:3785-3796.
- 1037 74. Oliver BG, Silver PM, Marie C, Hoot SJ, Leyde SE, White TC. 2008. Tetracycline alters  
1038 drug susceptibility in *Candida albicans* and other pathogenic fungi. *Microbiology*  
1039 154:960-970.
- 1040 75. Wishart JA, Hayes A, Wardleworth L, Zhang N, Oliver SG. 2005. Doxycycline, the drug  
1041 used to control the tet-regulatable promoter system, has no effect on global gene  
1042 expression in *Saccharomyces cerevisiae*. *Yeast* 22:565-569.
- 1043 76. Xie JL, Bohovych I, Wong EOY, Lambert J-P, Gingras A-C, Khalimonchuk O, Cowen LE,  
1044 Leach MD. 2017. Ydj1 governs fungal morphogenesis and stress response, and  
1045 facilitates mitochondrial protein import via Mas1 and Mas2. *Microbial Cell* 4:342-361.
- 1046 77. Bauer I, Misslinger M, Shadkhan Y, Dietl AM, Petzer V, Orasch T, Abt B, Graessle S,  
1047 Oshero N, Haas H. 2019. The Lysine Deacetylase RpdA Is Essential for Virulence in  
1048 *Aspergillus fumigatus*. *Front Microbiol* 10:2773.
- 1049 78. Grenier D, Huot MP, Mayrand D. 2000. Iron-chelating activity of tetracyclines and its  
1050 impact on the susceptibility of *Actinobacillus actinomycetemcomitans* to these  
1051 antibiotics. *Antimicrob Agents Chemother* 44:763-6.
- 1052 79. Peng Y, Zhang H, Xu M, Tan MW. 2018. A Tet-Off gene expression system for validation  
1053 of antifungal drug targets in a murine invasive pulmonary aspergillosis model. *Sci Rep*  
1054 8:443.
- 1055 80. Ferrer JL, Ravanel S, Robert M, Dumas R. 2004. Crystal structures of cobalamin-  
1056 independent methionine synthase complexed with zinc, homocysteine, and  
1057 methyltetrahydrofolate. *J Biol Chem* 279:44235-8.
- 1058 81. Warnock DW, Johnson EM, Burke J, Prachartam R. 1989. Effect of methotrexate alone  
1059 and in combination with antifungal drugs on the growth of *Candida albicans*. *J*  
1060 *Antimicrob Chemother* 23:837-47.
- 1061 82. Yang J, Gao L, Yu P, Kosgey JC, Jia L, Fang Y, Xiong J, Zhang F. 2019. In vitro synergy of  
1062 azole antifungals and methotrexate against *Candida albicans*. *Life Sci* 235:116827.
- 1063 83. Fan CC, Vitols KS, Huennekens FM. 1980. Inhibition of dihydrofolate reductase by  
1064 methotrexate: a new look at an old problem. *Adv Enzyme Regul* 18:41-52.
- 1065 84. Woodcock DM, Crowther PJ, Doherty J, Jefferson S, DeCruz E, Noyer-Weidner M, Smith  
1066 SS, Michael MZ, Graham MW. 1989. Quantitative evaluation of *Escherichia coli* host  
1067 strains for tolerance to cytosine methylation in plasmid and phage recombinants.  
1068 *Nucleic Acids Res* 17:3469-78.
- 1069 85. Amich J, Schaffner L, Haas H, Krappmann S. 2013. Regulation of sulphur assimilation is  
1070 essential for virulence and affects iron homeostasis of the human-pathogenic mould  
1071 *Aspergillus fumigatus*. *PLoS Pathog* 9:e1003573.
- 1072 86. Wood WB. 1966. Host specificity of DNA produced by *Escherichia coli*: bacterial  
1073 mutations affecting the restriction and modification of DNA. *J Mol Biol* 16:118-33.
- 1074 87. da Silva Ferreira ME, Kress MR, Savoldi M, Goldman MH, Hartl A, Heinekamp T,  
1075 Brakhage AA, Goldman GH. 2006. The akuB(KU80) mutant deficient for  
1076 nonhomologous end joining is a powerful tool for analyzing pathogenicity in  
1077 *Aspergillus fumigatus*. *Eukaryot Cell* 5:207-11.

- 1078 88. Szewczyk E, Nayak T, Oakley CE, Edgerton H, Xiong Y, Taheri-Talesh N, Osmani SA,  
1079 Oakley BR. 2006. Fusion PCR and gene targeting in *Aspergillus nidulans*. Nat Protoc  
1080 1:3111-20.
- 1081 89. Kafer E. 1977. Meiotic and mitotic recombination in *Aspergillus* and its chromosomal  
1082 aberrations. Adv Genet 19:33-131.
- 1083 90. Sambrook J, Fritsch EF, Maniatis T. 1989. Molecular Cloning: A Laboratory Manual, NY.
- 1084 91. Kolar M, Punt PJ, van den Hondel CA, Schwab H. 1988. Transformation of *Penicillium*  
1085 *chrysogenum* using dominant selection markers and expression of an *Escherichia coli*  
1086 *lacZ* fusion gene. Gene 62:127-34.
- 1087 92. Southern E. 2006. Southern blotting. Nat Protoc 1:518-25.
- 1088 93. Southern EM. 1975. Detection of specific sequences among DNA fragments separated  
1089 by gel electrophoresis. J Mol Biol 98:503-17.
- 1090 94. Reverberi M, Punelli M, Smith CA, Zjalic S, Scarpari M, Scala V, Cardinali G, Aspate N,  
1091 Pinzari F, Payne GA, Fabbri AA, Fanelli C. 2012. How peroxisomes affect aflatoxin  
1092 biosynthesis in *Aspergillus flavus*. PLoS One 7:e48097.
- 1093 95. Wedge DC, Allwood JW, Dunn W, Vaughan AA, Simpson K, Brown M, Priest L, Blackhall  
1094 FH, Whetton AD, Dive C, Goodacre R. 2011. Is Serum or Plasma More Appropriate for  
1095 Intersubject Comparisons in Metabolomic Studies? An Assessment in Patients with  
1096 Small-Cell Lung Cancer. Analytical Chemistry 83:6689-6697.
- 1097 96. Sumner LW, Amberg A, Barrett D, Beale MH, Beger R, Daykin CA, Fan TWM, Fiehn O,  
1098 Goodacre R, Griffin JL, Hankemeier T, Hardy N, Harnly J, Higashi R, Kopka J, Lane AN,  
1099 Lindon JC, Marriott P, Nicholls AW, Reily MD, Thaden JJ, Viant MR. 2007. Proposed  
1100 minimum reporting standards for chemical analysis. Metabolomics 3:211-221.
- 1101 97. Gromski PS, Muhamadali H, Ellis DI, Xu Y, Correa E, Turner ML, Goodacre R. 2015. A  
1102 tutorial review: Metabolomics and partial least squares-discriminant analysis - a  
1103 marriage of convenience or a shotgun wedding. Analytica Chimica Acta 879:10-23.
- 1104 98. Haug K, Cochrane K, Nainala VC, Williams M, Chang J, Jayaseelan KV, O'Donovan C.  
1105 2020. MetaboLights: a resource evolving in response to the needs of its scientific  
1106 community. Nucleic Acids Res 48:D440-D444.
- 1107 99. Owens RA, O'Keefe G, Smith EB, Dolan SK, Hammel S, Sheridan KJ, Fitzpatrick DA,  
1108 Keane TM, Jones GW, Doyle S. 2015. Interplay between Gliotoxin Resistance,  
1109 Secretion, and the Methyl/Methionine Cycle in *Aspergillus fumigatus*. Eukaryot Cell  
1110 14:941-57.
- 1111 100. Sperling AS, Grunstein M. 2009. Histone H3 N-terminus regulates higher order  
1112 structure of yeast heterochromatin. Proc Natl Acad Sci U S A 106:13153-9.
- 1113 101. Schindelin J, Arganda-Carreras I, Frise E, Kaynig V, Longair M, Pietzsch T, Preibisch S,  
1114 Rueden C, Saalfeld S, Schmid B, Tinevez JY, White DJ, Hartenstein V, Eliceiri K,  
1115 Tomancak P, Cardona A. 2012. Fiji: an open-source platform for biological-image  
1116 analysis. Nature Methods 9:676-682.
- 1117 102. Mutterer J, Zinck E. 2013. Quick-and-clean article figures with FigureJ. Journal of  
1118 Microscopy 252:89-91.
- 1119 103. Kavanagh K, Fallon JP. 2010. *Galleria mellonella* larvae as models for studying fungal  
1120 virulence. Fungal Biol Rev 24:79-83.
- 1121 104. Gago S, Buitrago MJ, Clemons KV, Cuenca-Estrella M, Mirels LF, Stevens DA. 2014.  
1122 Development and validation of a quantitative real-time PCR assay for the early  
1123 diagnosis of coccidioidomycosis. Diagn Microbiol Infect Dis 79:214-21.
- 1124 105. Stajich JE, Harris T, Brunk BP, Brestelli J, Fischer S, Harb OS, Kissinger JC, Li W, Nayak V,  
1125 Pinney DF, Stoeckert CJ, Jr., Roos DS. 2012. FungiDB: an integrated functional  
1126 genomics database for fungi. Nucleic Acids Res 40:D675-81.
- 1127 106. Fiser A, Sali A. 2003. MODELLER: Generation and refinement of homology-based  
1128 protein structure models. Macromolecular Crystallography, Pt D 374:461-491.

- 1129 107. Alvarez-Carretero S, Pavlopoulou N, Adams J, Gilsean J, Tabernero L. 2018. VSpice, an  
1130 Integrated Resource for Virtual Screening and Hit Selection: Applications to Protein  
1131 Tyrosine Phosphatase Inhibition. *Molecules* 23.  
1132 108. Trott O, Olson AJ. 2010. Software News and Update AutoDock Vina: Improving the  
1133 Speed and Accuracy of Docking with a New Scoring Function, Efficient Optimization,  
1134 and Multithreading. *Journal of Computational Chemistry* 31:455-461.

1135

1136

1137

1138

1139

1140

1141

1142

1143

1144

1145

1146

1147

1148

1149

1150

1151

1152

1153

1154

1155

1156

1157



1158 **FIGURE CAPTIONS**

1159 **Figure 1. Methionine synthase (MetH) enzymatic activity is essential for *A. fumigatus* viability.**

1160 **A)** Schematic representation of the trans-sulfuration pathway and its intersection with the one  
1161 carbon metabolic route. **B)** Both strains, a  $\Delta metF$  mutant (which blocks the one carbon  
1162 metabolism route) and a  $\Delta metG\Delta cysD$  mutant (which blocks the trans-sulfuration pathway)  
1163 could grow in the presence of methionine. In contrast, the *methH\_tetOFF* strain (*H\_OFF*) could  
1164 not grow in restrictive conditions (+Dox) even if methionine was supplemented. The phenotypic  
1165 analysis was repeated in three independent experiments. Representative plates are shown. **C)**  
1166 A second copy of the *methH* gene under the control of its own promoter was introduced in the  
1167 innocuous *Ku70* locus of the *H\_OFF* background strain. Two point-mutated versions of the gene  
1168 were introduced, one that causes a D→A substitution in amino acid 616 and another one that  
1169 causes a Y→A substitution in amino acid 662. In non-restrictive conditions all strains were able  
1170 to grow as the parental *H\_OFF* strain. In the presence of Dox and absence of met, the Y662A  
1171 protein was able to trigger significant growth, suggesting that its enzymatic activity is impaired  
1172 but not blocked. In the presence of Met the Y662A strain grew as well in restrictive as in non-  
1173 restrictive conditions, suggesting that partial enzymatic activity is sufficient to cover the  
1174 essential function of MetH. In restrictive conditions and absence of methionine, the D616A  
1175 strain was not able to grow, indicating that enzymatic activity is blocked in this mutated protein.  
1176 The D616A was also not able to grow in the presence of Dox and met, indicating that enzymatic  
1177 activity is required for the essential function of MetH. The phenotypic analysis was repeated in  
1178 three independent experiments. Representative plates are shown.

1179

1180 **Figure 2. Shortage of important downstream metabolites, but not toxic accumulation of**  
1181 **homocysteine, partially accounts for MetH essentiality.**

1182 **A)** Supplementation of the growth media with a variety of downstream metabolites (Fig. 1A)  
1183 showed that purines (adenine A and guanine G, 3 mM) could slightly reconstitute growth of the  
1184 *H\_OFF* strain in restrictive conditions. Further supplementation of amino acids improves growth,  
1185 but not to the wild-type levels. Folic acid (5 mM) could also reconstitute growth when amino  
1186 acids are the only N-source. **B)** Overexpression of genes that could detoxify a potential  
1187 accumulation of homocysteine did not reconstitute growth in the absence of MetH activity.  
1188 Further addition of adenine did not improve growth. The phenotypic analyses were repeated in  
1189 three independent experiments. Representative plates are shown.

1190

1191 **Figure 3. Lack of methionine synthase activity causes a decrease in cell energetics.**

1192 **A)** Normalized concentrations of metabolites in fungal mycelia ( $n=8$ ). Adenosine levels were  
1193 decreased in *H\_OFF*+Dox compared with *wt*+Dox, which agrees with its capacity to partially  
1194 reconstitute growth. Several metabolites of the glycolysis and TCA pathways were reduced in  
1195 *H\_OFF*+Dox compared with *wt*+Dox, suggesting low energetic levels. **B)** The levels of ATP  
1196 significantly decreased in the *H\_OFF* strain upon Dox addition, whilst they did not vary  
1197 significantly in the *wt* strain. Each point represents a biological replicate, which was assayed with  
1198 three technical replicates. Data was analysed using one sample *t*-test to a hypothetical value of  
1199 100 (i.e. no change in ratio of ATP). Graph displays the mean and standard deviation. **C)** Pyruvate  
1200 as the sole carbon source could reconstitute growth of the *H\_OFF* strain in restrictive conditions  
1201 to wild-type levels. For both strains, growth was limited and slightly improved in the presence  
1202 of amino acids. ATP could fully reconstitute growth of *H\_OFF* when amino acids were the sole  
1203 N-source. The phenotypic analyses were repeated in three independent experiments.  
1204 Representative plates are shown. **D)** RT-PCR calculation of the fold-change in genetic expression  
1205 of *metF* and *G6PD* with respect to their expression in wild-type without Dox. Each point  
1206 represents a biological replicate which was analysed with three technical replicates. Data was  
1207 analysed using one sample *t*-test to a hypothetical value of 1 (i.e. no change in expression).  
1208 Graphs display the mean and standard deviation. **E)** Schematic representation of the metabolic  
1209 imbalance started with MetH repression (1). Lack of the enzymatic activity caused a shortage of  
1210 5,10-methylene-THF and consequently of purine rings (2). This was sensed as a shortage of  
1211 nucleotides that the cell attempted to compensate through an unknown mechanism, seemingly  
1212 TOR and PKA independent (3), that activated glucose flow through the Pentose Phosphate  
1213 Pathway (PPP) (4). That caused a reduction of glycolysis and TCA cycles, which in turn decreased  
1214 ATP levels (5). ATP usage for *S*-adenosylmethionine (SAM) synthesis was maintained, which  
1215 caused a drop in cell energy that resulted in growth arrest (6). Genes/pathways/compounds  
1216 expected to be reduced are highlighted in green and those increased in magenta.

1217

1218 **Figure 4. External S-adenosylmethionine (SAM) reconstitutes ATP levels and growth.**

1219 **A)** Addition of SAM to the medium reconstituted growth of the *H\_OFF* strain in restrictive  
1220 conditions. The phenotypic analysis was repeated in two independent experiments.  
1221 Representative plates are shown. **B)** Levels of SAM did not significantly decrease upon Dox  
1222 administration (5  $\mu\text{g/mL}$ ) in wild-type or *H\_OFF* strains. Graphs depict mean and SD of three  
1223 biological and two technical replicates. Data were analysed using one-way ANOVA with

1224 Bonferroni post-tests adjustment. **C)** Presence of SAM in the medium (0.5 mM) prevented the  
1225 decrease in ATP levels observed in the *H\_OFF* strain upon Dox addition. In fact, ATP levels were  
1226 increased compared to the minus Dox condition. Graphs depict mean and SD of two biological  
1227 and four technical replicates. **D)** Expression of MetH-GFP in the *H\_OFF* background showed that  
1228 the protein localised both in cytoplasm and nucleus. Singular channels are shown in greyscale.  
1229 In composite image magenta=DAPI and green=GFP (Bar=10  $\mu$ m).

1230

1231 **Figure 5. Repression of *methH* transcription causes inhibition of growth *in vitro*.**

1232 **A)** Addition of 1  $\mu$ g/mL Dox to 12 and 16 h grown mycelia strongly reduced fungal biomass,  
1233 measured 24 h later. This was more pronounced in media without methionine. The effect was  
1234 lost when Dox was added 24 h after inoculation. For comparison, fungal biomass of mycelia  
1235 harvested at the time of Dox addition (12, 16 and 24 h post-inoculation) is shown. Three  
1236 independent experiments were performed, using 3 technical replicates for each. **B)** Microscopic  
1237 images of 8 h germinated spores treated with 10  $\mu$ g/mL Dox. Images were taken 16 h after Dox  
1238 addition (wide-field microscopy) and again 24 h later (stereomicroscopy). Dox addition halts  
1239 growth of *H\_OFF* strain in a sustained manner. **C)** Time-lapse microscopy of *H\_OFF* growth upon  
1240 Dox addition. Dox was added to 8 h grown conidia, which caused growth inhibition that was  
1241 obvious after  $\sim$ 4 h. Growth was virtually halted for as long as Dox was present. **D)**  $\sim$ 6 h after Dox  
1242 withdrawal, *H\_OFF* growth resumed, showing that the effect was fungistatic.

1243

1244 **Figure 6. Downregulation of *methH* *in vivo* in established infections shows a beneficial effect**  
1245 **comparable to the target of azoles.**

1246 **A)** Administration of a Dox regimen (Fig. S9A) to *Galleria mellonella* infected with either the  
1247 *H\_OFF* strain or the *51A\_OFF* control strain showed a beneficial effect in survival. For both  
1248 strains, starting regimen at the time of infection triggered a significant improvement in survival  
1249 (50% VS 17.2% for *51A\_OFF*,  $P=0.0036$ , and 41.45% VS 6.67% for *H\_OFF*,  $P=0.022$ ). Dox regimen  
1250 6 h after infection also triggered a significant improvement in survival for both strains (42.8% VS  
1251 17.2% for *51A\_OFF*,  $P=0.0007$ , and 32.26% VS 6.67% for *H\_OFF*,  $P=0.0324$ ). The curves show the  
1252 pooled data from 3 independent experiments. Curves were compared using the Log-Rank test.  
1253 **B)** Leukopenic mice were infected with *51A\_OFF* or *H\_OFF* and a Dox regimen (Fig. S9B)  
1254 administered 16 h after infection. Upon Dox treatment, fungal burden in the lungs was  
1255 significantly reduced for both strains ( $P=0.0279$  for *51A\_OFF* and  $P=0.0019$  for *H\_OFF*). Two

1256 independent experiment were carried out. Each point in the graphs represents one mouse (n=9).  
1257 Burdens for each strain were compared using a Mann Whitney test.

1258

1259 **Figure 7. Virtual-screening of fungal and human methionine synthases reveals different**  
1260 **druggability of the proteins.**

1261 **A)** The structures of the crystallized *C. albicans* and the predicted *A. fumigatus* methionine  
1262 synthases are highly similar. **B)** In contrast, the structure of the human enzyme is very different,  
1263 having the 5-methyl-tetrahydrofolate and homocysteine binding sites separated. **C)** Detail of the  
1264 active site of fungal methionine synthases, with the methionine, folate and zinc displayed. **D)**  
1265 Tetrahydrofolate binding site of the human protein. **E)** Virtual screening on the *A. fumigatus*  
1266 protein found four ligand binding clusters in the structure, two of which (C1, C2) match the  
1267 binding position of the 5-methyl-tetrahydrofolate and the methionine. **F)** In the human enzyme  
1268 two clusters were found, one (C1) that overlaps with the tetrahydrofolate binding site and  
1269 (another C2) in a nearby pocket.

1270

1271

1272

1273

1274

1275

1276

1277

1278

1279

1280

1281

1282

1283

1284

1285 **SUPPLEMENTARY FIGURES**

1286 **Figure S1.**

1287 **A)** Addition of 1  $\mu\text{g}/\text{mL}$  Dox to a 16 h growing mycelia quickly downregulated transcription of  
1288 *metH*. **B)** The growth of two *metH\_tetOFF* strains in two different backgrounds was prevented  
1289 in the presence of as little as 0.5  $\mu\text{g}/\text{mL}$  Dox, even in the presence of methionine. The phenotypic  
1290 analysis was repeated in three independent experiments. Representative plates are shown. **C)**  
1291 An *A. fumigatus*  $\Delta\text{metG}\Delta\text{cysD}$  mutant (methionine auxotroph) was completely avirulent in a  
1292 leukopenic murine model of invasive pulmonary aspergillosis. **D)** A strain expressing a C-  
1293 terminus-GFP-tagged MetH-D616 protein from the pJA49 overexpression plasmid (Fig. S2) in the  
1294 *H\_OFF* background strain showed fluorescence in -Dox conditions (did not grow in +Dox  
1295 conditions, Fig. S5), proving that the point mutated MetH-D616 protein is stable.

1296 **Figure S2.**

1297 **A)** Schematic representation of the pJA49 plasmid for episomal overexpression of genes in *A.*  
1298 *fumigatus*. It carries the *A. nidulans* AMA1 autologous replicating sequence and the hygromycin  
1299 B resistance gene (*hygrB*) as a selection marker. A unique *StuI* restriction site allows introduction  
1300 of any PCR amplified ORF in frame under the control of the *A. fumigatus* strong promoter *hspA*  
1301 and the *A. nidulans* *trpC* terminator. **B)** Schematic representation of the genes overexpressed  
1302 (in green) to eliminate potential accumulation of toxic homocysteine and derivatives (in red). **C)**  
1303 Fold change in expression level of *mecA* and *sahL* measured by RT-PCR. Both genes are highly  
1304 overexpressed from plasmid pJA49. **D)** Expression level of *blhA* determined by retrotranscription  
1305 and PCR (fold change cannot be calculated as this gene is not expressed in *A. fumigatus*).

1306 **Figure S3.**

1307 Relevance of the nitrogen source for the capacity of different metabolites to reconstitute growth  
1308 of the *H\_OFF* strain in restrictive conditions. Amino acids alone were not able to reconstitute  
1309 growth. Folic acid could partially, and ATP and SAM completely reconstituted growth when  
1310 amino acids were the only N-source, suggesting that they are only taken up when there is a high  
1311 variety of permeases in the cell membrane. Pyruvate could reconstitute growth to wild-type  
1312 level in the absence of glucose and independently of the in presence of amino acids, although  
1313 growth improved when they were added.

1314 **Figure S4.**

1315 **A)** Principal component analysis (PCA) scores plot of the GC-MS metabolome analysis. The wild-  
1316 type and *H\_OFF* strains clusters were close before addition of Dox and became clearly separated

1317 upon 6 h incubation in the presence of Dox. **B)** The content of several amino acids and sugars  
1318 were reduced in the H\_OFF+Dox sample compared with the developmentally matched wt+Dox  
1319 sample. **C)** Neither low concentrations of rapamycin (to partially inhibit TOR) nor of H89 (to  
1320 partially inhibit PKA) were able to reconstitute growth of the *H\_OFF* strain in restrictive  
1321 conditions. This suggests that these regulatory pathways are not responsible for the deleterious  
1322 switch in metabolism that causes a drop in cellular ATP.

1323 **Figure S5.**

1324 **A)** Expression of MetH-GFP wild type and MetH<sup>R742A</sup>-GFP reconstituted growth of the *H\_OFF*  
1325 strain in restrictive conditions, demonstrating that the proteins are active. As expected, the  
1326 inactive protein MetH<sup>D616A</sup>-GFP did not trigger growth. **B)** Western-blot of MetH. Strains  
1327 expressing MetH-GFP wild type and MetH<sup>R742A</sup>-GFP were grown in the presence of Dox, nuclei  
1328 isolated from the mycelia (as described in material and methods), proteins purified and blotted  
1329 with an anti-GFP antibody. The MetH<sup>R742A</sup>-GFP protein could be detected in nuclei, at similar  
1330 levels as the wild-type MetH-GFP.

1331 **Figure S6.**

1332 Doxycycline can perturb *A. fumigatus* hyphal mitochondrial morphology at high concentrations.  
1333 *A. fumigatus* hyphae were stained with 10  $\mu$ M Rhodamine 123 after overnight incubation in **A)**  
1334 0  $\mu$ g/ml, **B)** 1000  $\mu$ g/ml, **C)** 1  $\mu$ g/ml, **D)** 10  $\mu$ g/ml and **E)** 100  $\mu$ g/ml Doxycycline. Representative  
1335 single plane confocal fluorescence images are displayed in A-E. Notice the granulation in B (1000  
1336  $\mu$ g/ml and variable response in E (100  $\mu$ g/ml), whereas C (1  $\mu$ g/ml) and D (10  $\mu$ g/ml) display  
1337 normal mitochondrial morphology . Scale bars = 10  $\mu$ m.

1338 **Figure S7.**

1339 **A)** Measurement of fungal growth by Optical Density (OD) showed that addition of 1  $\mu$ g/mL Dox  
1340 12 or 16 h after inoculation significantly reduced fungal growth at 24 and 36 h post-incubation.  
1341 **B)** Microscopy analysis of the effect of the addition of 2 concentrations of Dox to resting or 8 h  
1342 germinated conidia of the *H\_OFF* strain. In the absence of methionine growth is immediately  
1343 halted in a sustained manner. In the presence of methionine conidia can germinate and  
1344 germlings elongate the growing tube before growth stops. However, once arrested, growth is  
1345 halted in a sustained manner. Microimages were taken with a wide-field microscope at 16 h  
1346 post-inoculation and with a stereomicroscope 40 h after inoculation (to be able to capture the  
1347 huge mass of fungal growth in the control conditions).

1348 **Figure S8.**

1349 **A)** Colony formation of the strain *cyp51A\_tetOFFΔcyp51B* (*51A\_OFF*) is completely prevented  
1350 with as little as 0.1 µg/mL on an agar plate. Phenotypic analysis was repeated in two  
1351 independent experiments. **B)** Microscopy analysis of the effect of the addition of 2  
1352 concentrations of Dox to resting or 8 h germinated conidia of the *51A\_OFF* strain. In both cases  
1353 growth is immediately blocked. We could observe bursting germlings with high doses of Dox  
1354 (red arrow).

1355 **Figure S9.**

1356 **A)** Dox regime applied to *Galleria mellonella*. A maximum of 5 doses (50 mg/kg) were applied,  
1357 commencing either at the time of infection or 6 h later. **B)** Dox regimen administered to mice.  
1358 Treatment started 16 h after infection with a subcutaneous (SC) Dox injection (50 mg/kg) and  
1359 change to Dox food. Treatment was maintained with SC injections every 12 h after the infection  
1360 time-point. Dox concentration in the lungs was measured in a preliminary experiment with  
1361 uninfected mice. Lungs were harvested 4 h after the beginning of treatment, 2 h after the third  
1362 injection (on day 2) and 9 h after the 5<sup>th</sup> (on day 3, last injection). The concentrations were  
1363 determined to range from 0.9 to 2.2 µg/mL, sufficient to downregulate gene expression  
1364 according to the results *in vitro*.

1365 **Video S1**

1366 Time-lapse of growth of the *H\_OFF* strain upon Dox addition and withdrawal.

1367 **Video S2**

1368 Time-lapse of growth of the *wild-type* strains upon Dox addition.

Fig. 1

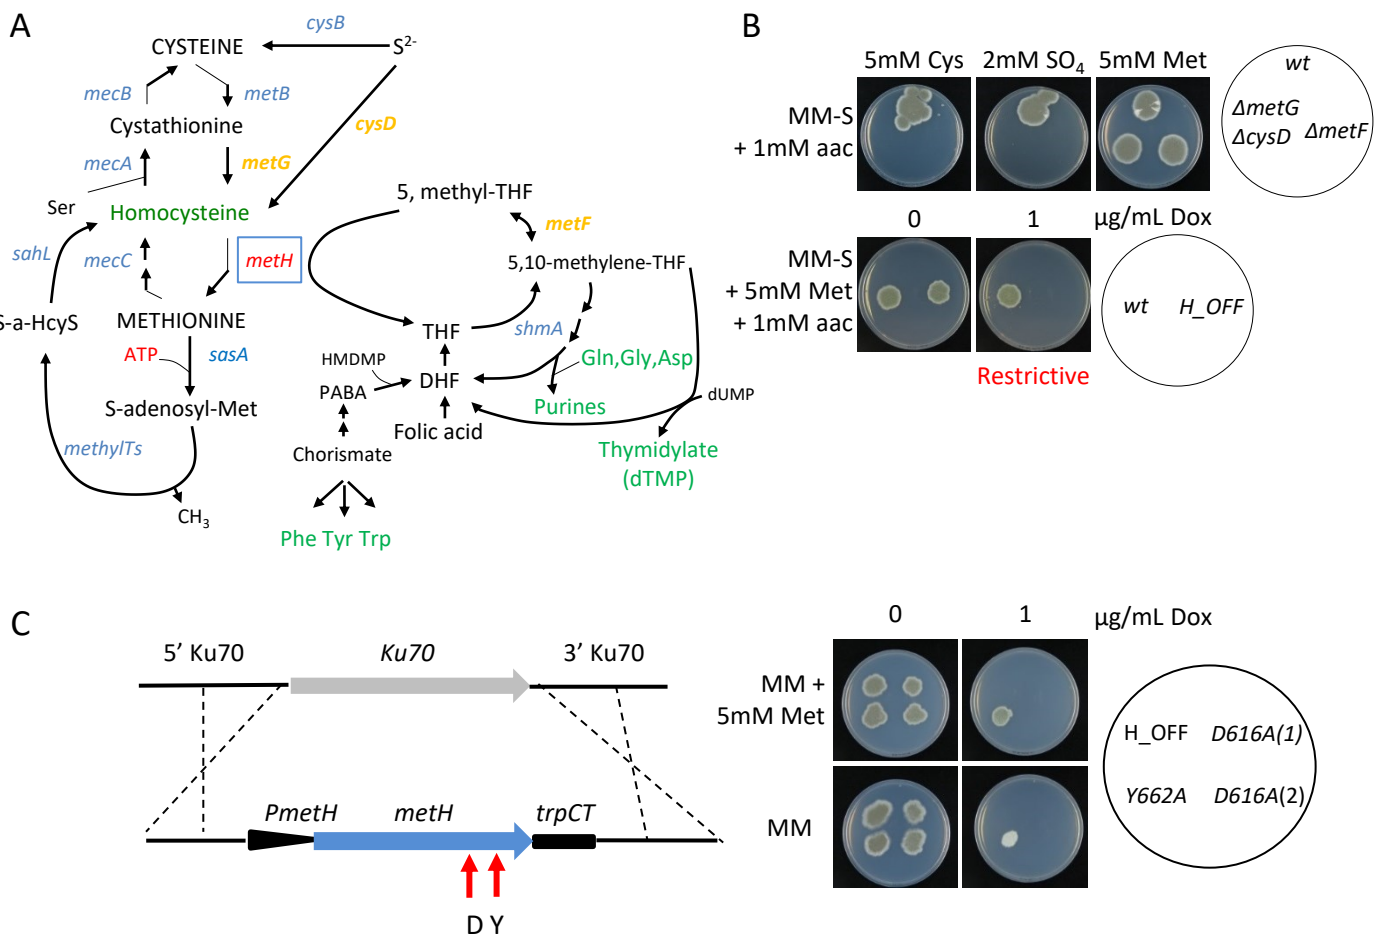



Fig. 2

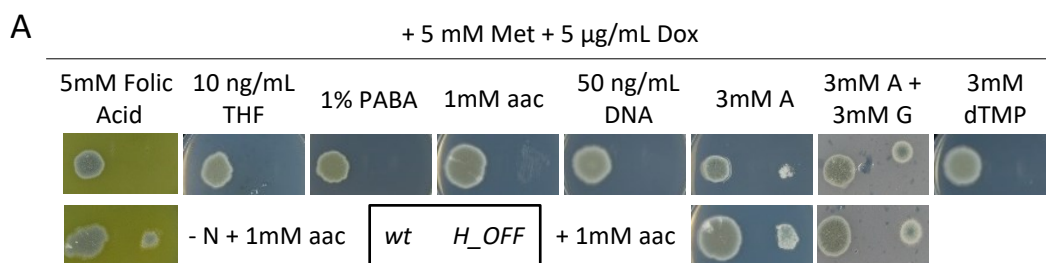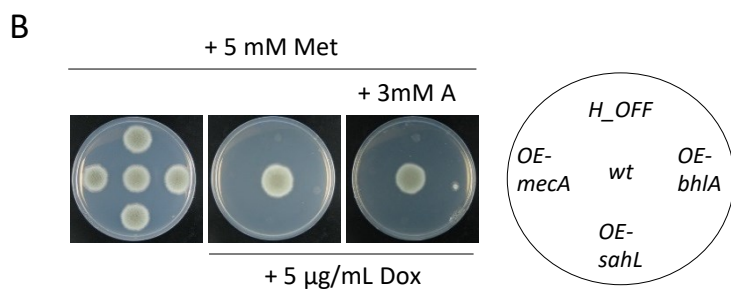

**Fig. 3**

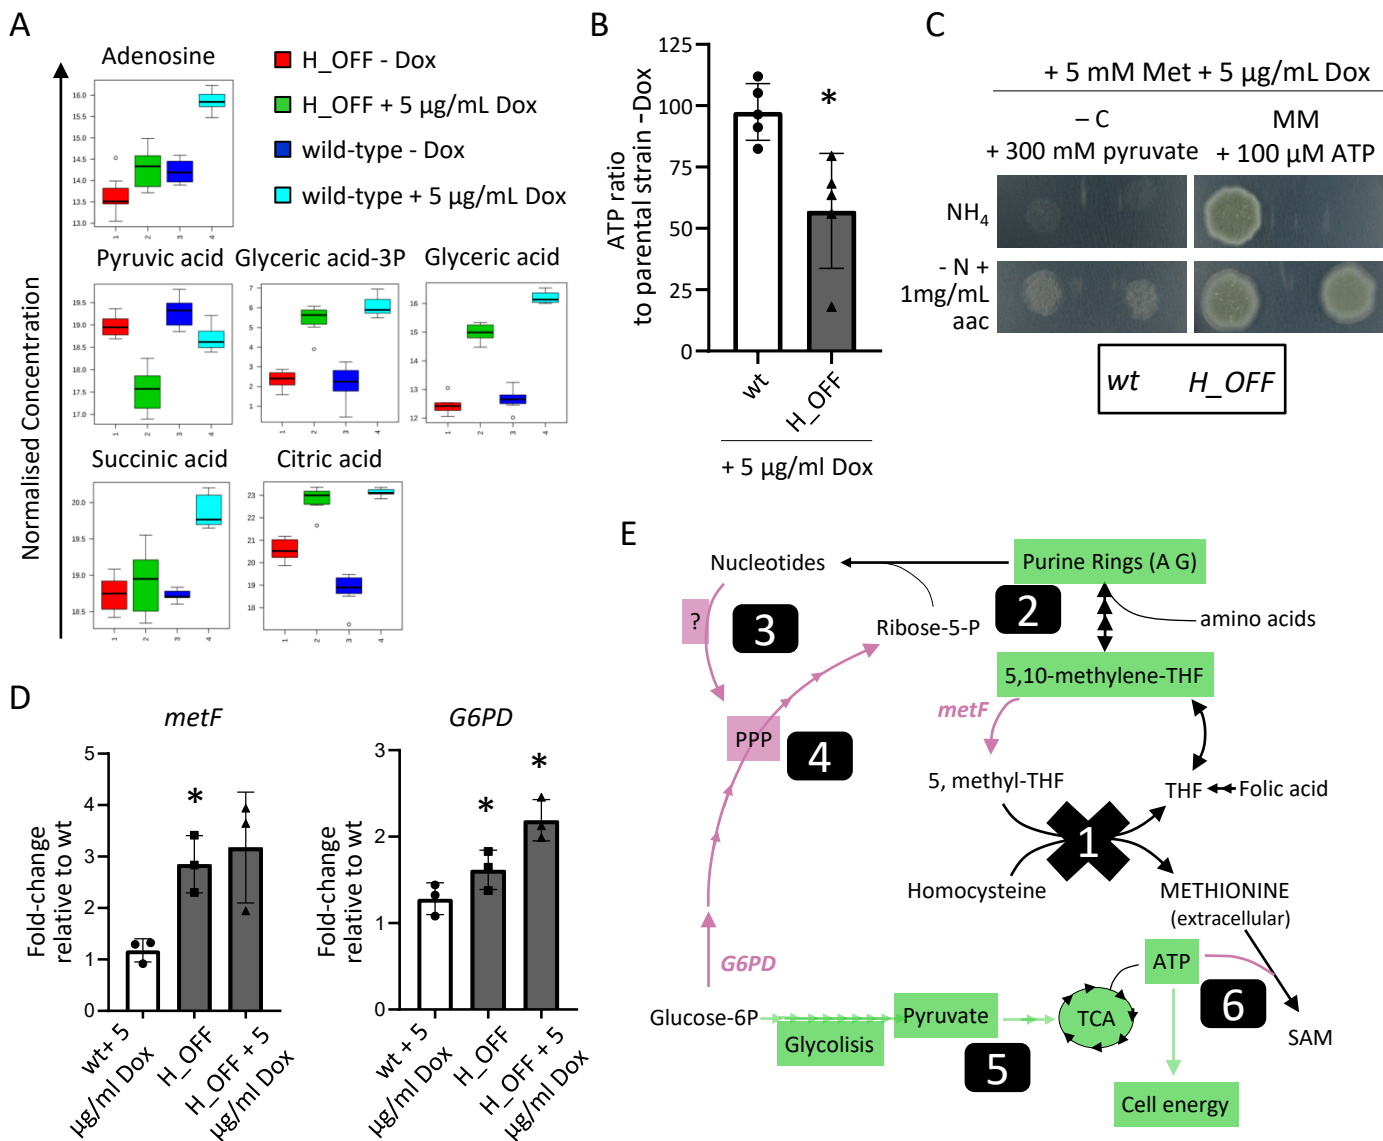

Fig. 4

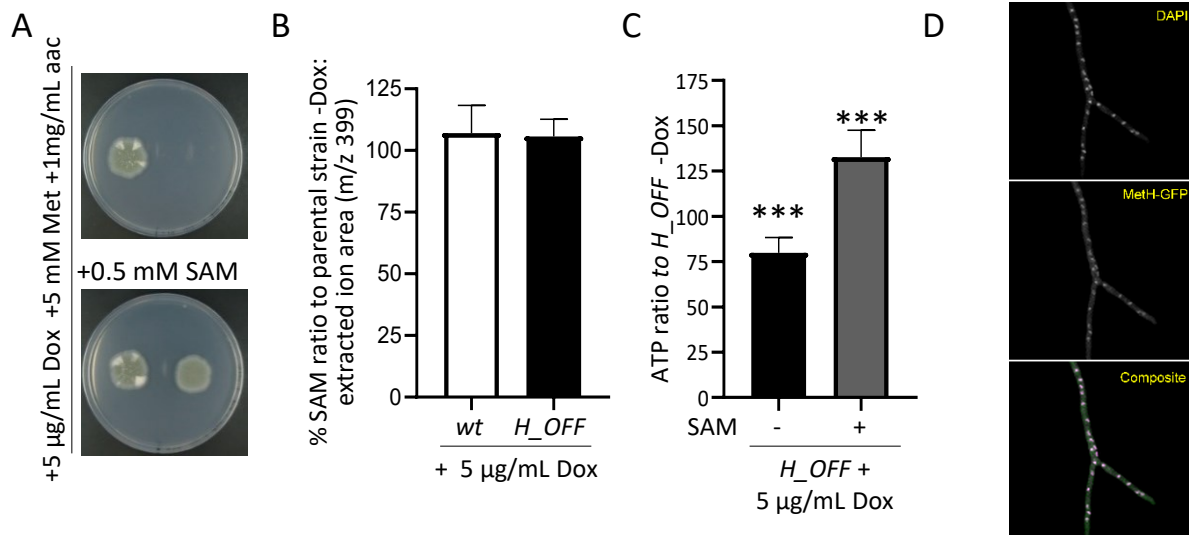

**Fig. 5**

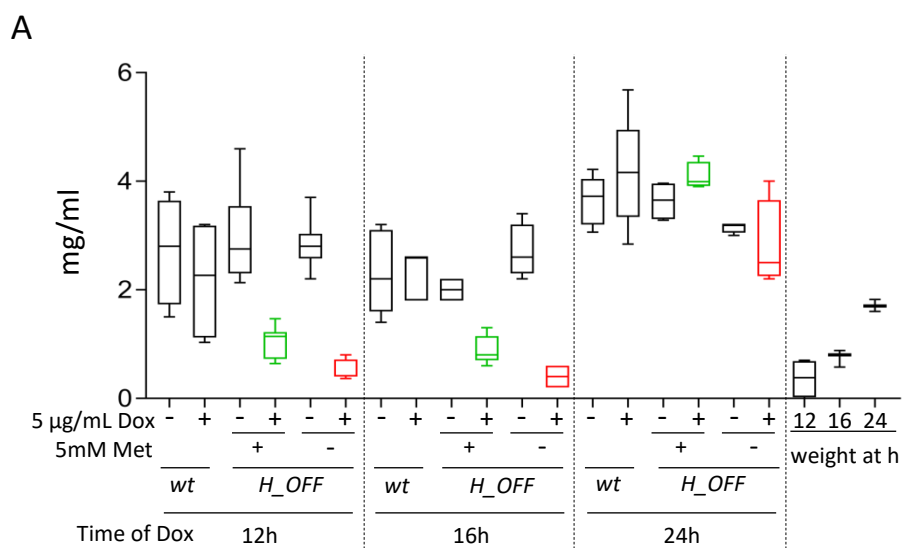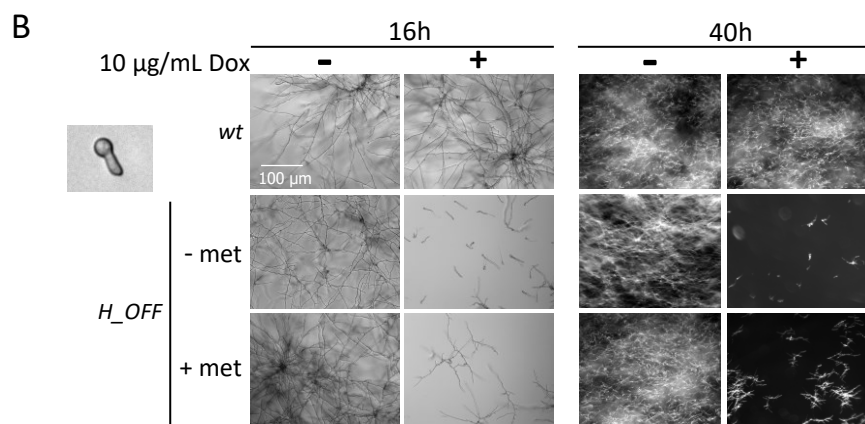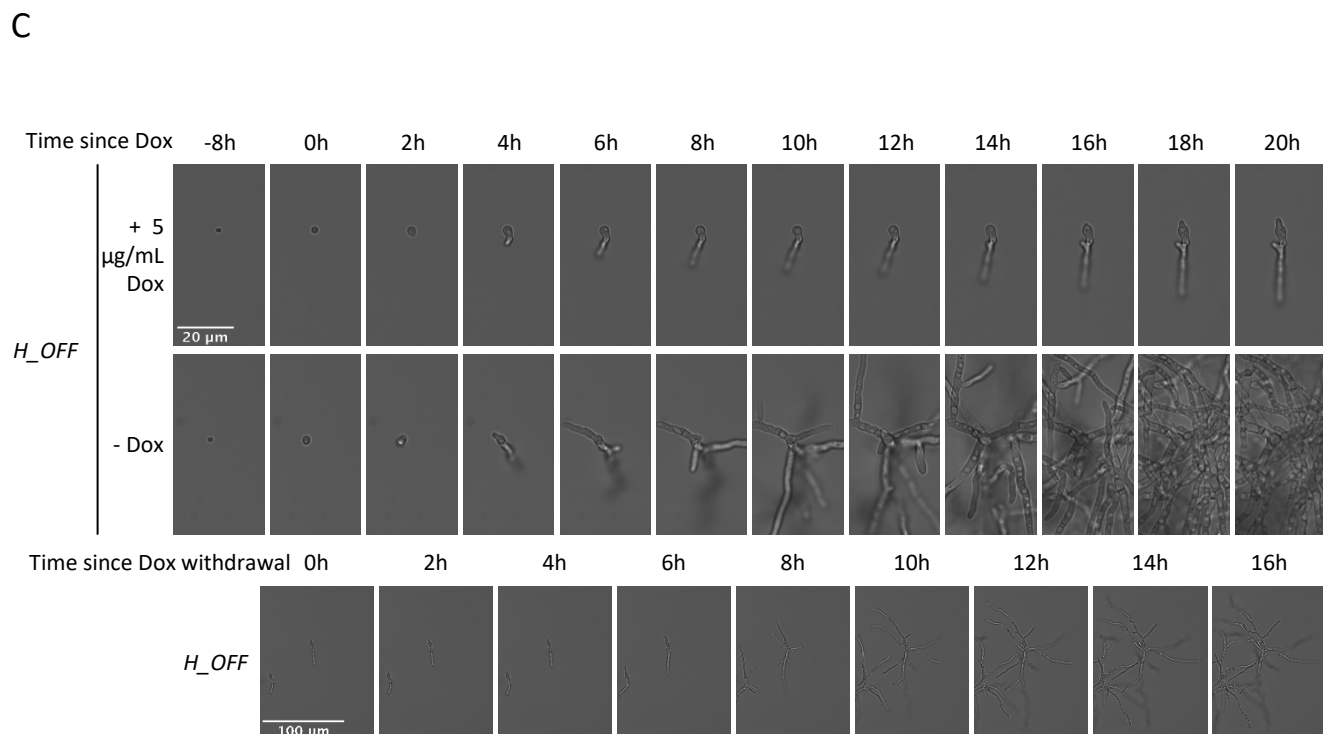

Fig. 6

A

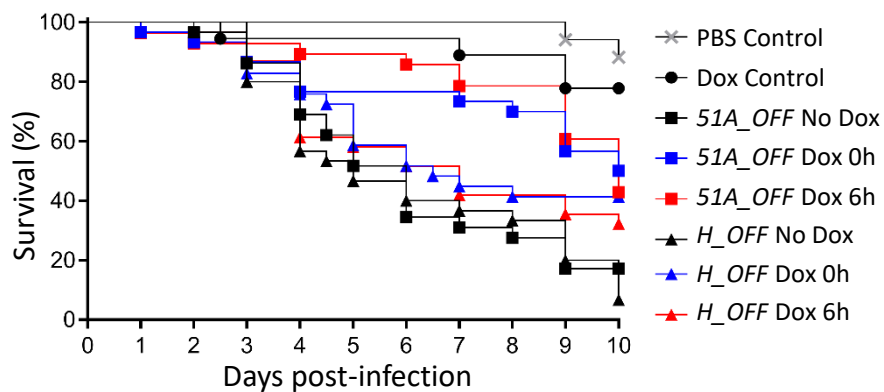

B

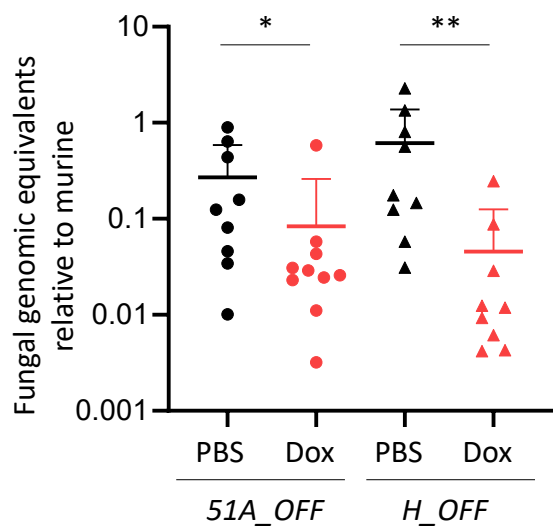

Fig. 7

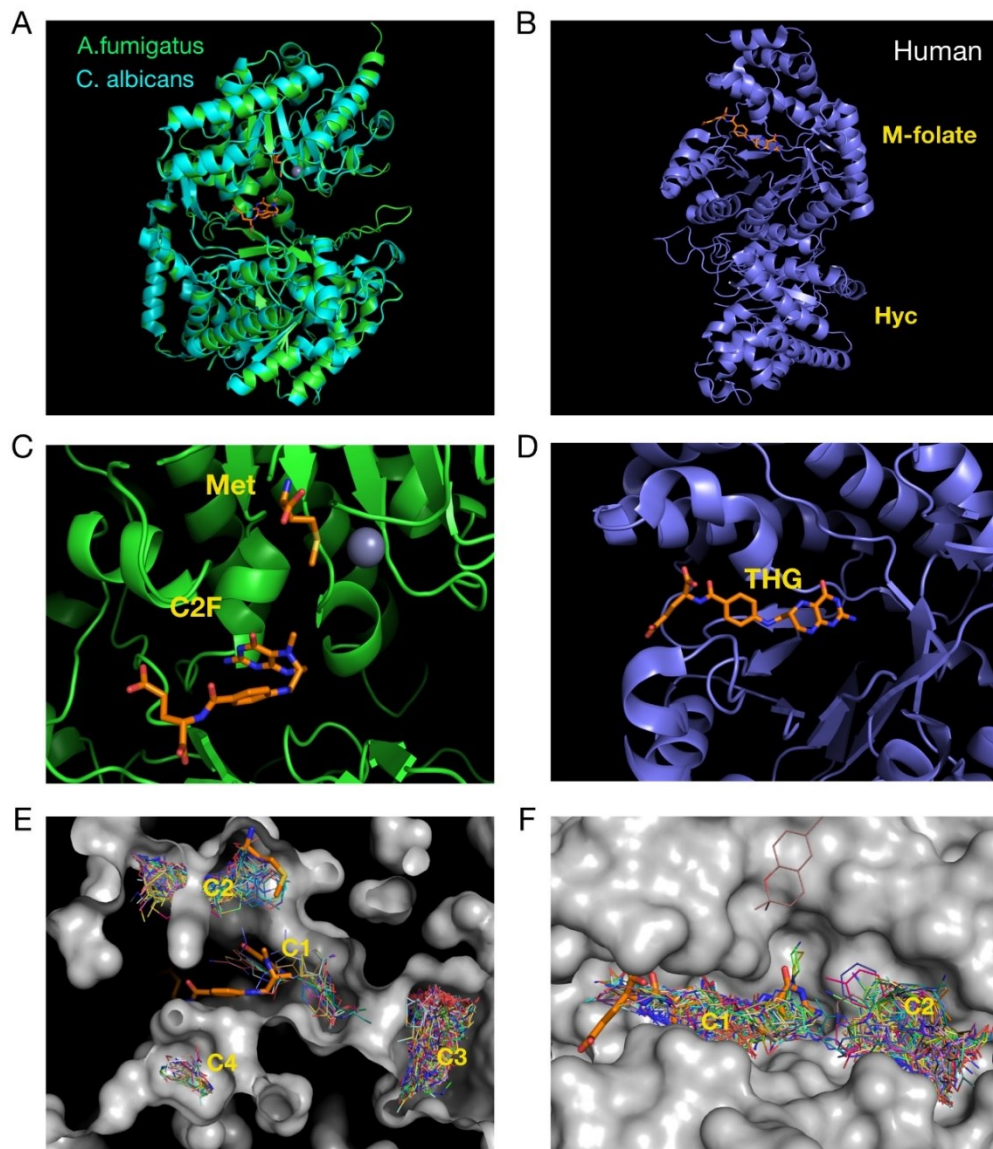

Source: https://www.biorxiv.org/content/10.1101/2020.06.04.131862v3.full.pdf
